# Supplementary material
Source: Royal Society of Chemistry journal article supplement (doi:10.1039/d6qi00913a)
Supplement: d6qi00913a1.pdf [file d6qi00913a1.pdf]

Supplementary Information (SI) for Inorganic Chemistry Frontiers.

This journal is © the Partner Organisations 2026

## Supporting Information

### **1D Anionic Dysprosium(III) Coordination Polymers with Photoactive Protonated 4-Styrylpyridinium Counter-Ions: Photoinduced Modulation of Magnetic Behavior *via* Synergistic Dual Photoresponses**

Shi-Kun Yan,<sup>†a</sup> Yu-Hang Wang,<sup>†a</sup> Yan-Rui Zhao,<sup>a</sup> Jin Zhang,<sup>a</sup> Qi-Yue Xin,<sup>a</sup> Ya-Hui Wang,<sup>a</sup> Guang-Zhi Zhou,<sup>a</sup> Ai-Huan Sun,<sup>\*b</sup> Ji-Xiang Hu,<sup>\*a, c</sup> Guo-Ming Wang<sup>\*a</sup>

<sup>a</sup>*Department College of Chemistry and Chemical Engineering, Qingdao University, Shandong, 266071, China*

<sup>b</sup>*Department College of Chemistry and Chemical Engineering, Taishan University, Taian, 271000, China*

<sup>c</sup>*State Key Laboratory of Fine Chemicals, Dalian University of Technology, Dalian 116024, China*

## Contents

**Fig. S1** The asymmetric unit of compound **1-Dy**.

**Fig. S2** The asymmetric unit of compound **2-Dy**.

**Fig. S3** The asymmetric unit of compound **3-Dy**.

**Fig. S4** The packing mode of **1-Dy** with H-bonds is shown as dashed lines.

**Fig. S5** The packing mode of **2-Dy** with H-bonds is shown as dashed lines.

**Fig. S6** The packing mode of **3-Dy** with H-bonds is shown as dashed lines.

**Fig. S7** The  $\pi$ - $\pi$  stacking interaction between ligands in **1-Dy**.

**Fig. S8** The  $\pi$ - $\pi$  stacking interaction between ligands in **2-Dy**.

**Fig. S9** The  $\pi$ - $\pi$  stacking interaction between ligands in **3-Dy**.

**Fig. S10** PXRD patterns of simulated, experimental complexes **1-Dy**, **1-Y**, and **1-Gd**.

**Fig. S11** PXRD patterns of simulated, experimental complexes **2-Dy**, **2-Y**, and **2-Gd**.

**Fig. S12** PXRD patterns of simulated, experimental complexes **3-Dy**, **3-Y**, and **3-Gd**.

**Fig. S13** Solid-state EPR spectra of **1-Dy** before and after light irradiation recorded at room temperature at a frequency of 9.54 GHz.

**Fig. S14** Solid-state EPR spectra of **2-Dy** before and after light irradiation recorded at room temperature at a frequency of 9.54 GHz.

**Fig. S15** Solid-state EPR spectra of **3-Dy** before and after light irradiation and after heating recorded at room temperature at a frequency of 9.54 GHz.

**Fig. S16** Solid-state EPR spectra of **1-Y** before and after light irradiation recorded at room temperature at a frequency of 9.54 GHz.

**Fig. S17** Solid-state EPR spectra of **2-Y** before and after light irradiation recorded at room temperature at a frequency of 9.54 GHz.

**Fig. S18** Solid-state EPR spectra of **3-Y** before and after light irradiation recorded at room temperature at a frequency of 9.54 GHz.

**Fig. S19** Solid-state EPR spectra of **1-Gd** before and after light irradiation recorded at room temperature at a frequency of 9.54 GHz.

**Fig. S20** Solid-state EPR spectra of **2-Gd** before and after light irradiation recorded at room temperature at a frequency of 9.54 GHz.

**Fig. S21** Solid-state EPR spectra of **3-Gd** before and after light irradiation recorded at room temperature at a frequency of 9.54 GHz.

**Fig. S22** Solid-state UV-vis absorption spectra of **1-Gd** at different irradiation time.

**Fig. S23** Solid-state UV-vis absorption spectra of **2-Gd** at different irradiation time.

**Fig. S24** Solid-state UV–vis absorption spectra of **3-Gd** at different irradiation time.

**Fig. S25**  $^1\text{H}$  NMR (400 MHz,  $\text{DMSO-}d_6$ , room temperature) spectra before and after irradiation of Me-4-arylethene.

**Fig. S26**  $^1\text{H}$  NMR (400 MHz,  $\text{DMSO-}d_6$ , room temperature) spectra before and after irradiation of H-4-arylethene.

**Fig. S27**  $^1\text{H}$  NMR (400 MHz,  $\text{DMSO-}d_6$ , room temperature) spectra before and after irradiation of Cl-4-arylethene.

**Fig. S28**  $^1\text{H}$  NMR (400 MHz,  $\text{DMSO-}d_6$ , room temperature) spectra before and after irradiation of **1-Dy**.

**Fig. S29**  $^1\text{H}$  NMR (400 MHz,  $\text{DMSO-}d_6$ , room temperature) spectra before and after irradiation of **2-Dy**.

**Fig. S30**  $^1\text{H}$  NMR (400 MHz,  $\text{DMSO-}d_6$ , room temperature) spectra before and after irradiation of **3-Dy**.

**Fig. S31**  $^1\text{H}$  NMR (400 MHz,  $\text{DMSO-}d_6$ , room temperature) spectra before and after irradiation of **1-Y**.

**Fig. S32**  $^{13}\text{C}$  NMR (400 MHz,  $\text{DMSO-}d_6$ , room temperature) spectra before and after irradiation of **1-Y**.

**Fig. S33**  $^1\text{H}$  NMR (400 MHz,  $\text{DMSO-}d_6$ , room temperature) spectra before and after irradiation of **2-Y**.

**Fig. S34**  $^{13}\text{C}$  NMR (400 MHz,  $\text{DMSO-}d_6$ , room temperature) spectra before and after irradiation of **2-Y**.

**Fig. S35**  $^1\text{H}$  NMR (400 MHz,  $\text{DMSO-}d_6$ , room temperature) spectra before and after irradiation of **3-Y**.

**Fig. S36**  $^{13}\text{C}$  NMR (400 MHz,  $\text{DMSO-}d_6$ , room temperature) spectra before and after irradiation of **3-Y**.

**Fig. S37** Room-temperature IR spectra of the irradiated samples with different substituents in the Dy series recorded using a diamond ATR probe.

**Fig. S38** Room-temperature IR spectra of **1-Dy** and the corresponding irradiated sample **1\*-Dy** recorded using a diamond ATR probe.

**Fig. S39** Room-temperature IR spectra of **2-Dy** and the corresponding irradiated sample **2\*-Dy** recorded using a diamond ATR probe.

**Fig. S40** Room-temperature IR spectra of **3-Dy** and the corresponding irradiated sample **3\*-Dy** recorded using a diamond ATR probe.

**Fig. S41** Room-temperature IR spectra of the irradiated samples with different

substituents in the Y series recorded using a diamond ATR probe.

**Fig. S42** Room-temperature IR spectra of **1-Y** and the corresponding irradiated sample **1\*-Y** recorded using a diamond ATR probe.

**Fig. S43** Room-temperature IR spectra of **2-Y** and the corresponding irradiated sample **2\*-Y** recorded using a diamond ATR probe.

**Fig. S44** Room-temperature IR spectra of **3-Y** and the corresponding irradiated sample **3\*-Y** recorded using a diamond ATR probe.

**Fig. S45** Room-temperature IR spectra of the irradiated samples with different substituents in the Gd series recorded using a diamond ATR probe.

**Fig. S46** Room-temperature IR spectra of **1-Gd** and the corresponding irradiated sample **1\*-Gd** recorded using a diamond ATR probe.

**Fig. S47** Room-temperature IR spectra of **2-Gd** and the corresponding irradiated sample **2\*-Gd** recorded using a diamond ATR probe.

**Fig. S48** Room-temperature IR spectra of **3-Gd** and the corresponding irradiated sample **3\*-Gd** recorded using a diamond ATR probe.

**Fig. S49** Time-dependent fluorescence intensity spectra of compound **1-Dy**.

**Fig. S50** Time-dependent fluorescence intensity spectra of compound **2-Dy**.

**Fig. S51** Time-dependent fluorescence intensity spectra of compound **3-Dy**.

**Fig. S52** Isothermal magnetization curves before and after irradiation at 2 K for **1-Dy**.

**Fig. S53** Isothermal magnetization curves before and after irradiation at 2 K for **2-Dy**.

**Fig. S54** Isothermal magnetization curves before and after irradiation at 2 K for **3-Dy**.

**Fig. S55** Temperature dependence of the  $\chi'$  and  $\chi''$  components of the ac magnetic susceptibility for **1-Dy** measured at various ac frequencies under zero dc field (a) and under the optimal dc field (b).

**Fig. S56** The frequency dependent  $\chi'$  and  $\chi''$  signals of **1-Dy** measured under 0 Oe dc and 5 Oe ac fields (a) and under 1200 Oe dc and 5 Oe ac fields (b).

**Fig. S57** Temperature dependence of the  $\chi'$  and  $\chi''$  components of the ac magnetic susceptibility for **1\*-Dy** measured at various ac frequencies under zero dc field (a) and under the optimal dc field (b).

**Fig. S58** The frequency dependent  $\chi'$  and  $\chi''$  signals of **1\*-Dy** measured under 0 Oe dc and 5 Oe ac fields (a) and under 1200 Oe dc and 5 Oe ac fields (b).

**Fig. S59** Temperature dependence of the  $\chi'$  and  $\chi''$  components of the ac magnetic

susceptibility for **2-Dy** measured at various ac frequencies under zero dc field (a) and under the optimal dc field (b).

**Fig. S60** The frequency dependent  $\chi'$  and  $\chi''$  signals of **2-Dy** measured under 0 Oe dc and 5 Oe ac fields (a) and under 1200 Oe dc and 5 Oe ac fields (b).

**Fig. S61** Temperature dependence of the  $\chi'$  and  $\chi''$  components of the ac magnetic susceptibility for **2\*-Dy** measured at various ac frequencies under zero dc field (a) and under the optimal dc field (b).

**Fig. S62** The frequency dependent  $\chi'$  and  $\chi''$  signals of **2\*-Dy** measured under 0 Oe dc and 5 Oe ac fields (a) and under 1200 Oe dc and 5 Oe ac fields (b).

**Fig. S63** Temperature dependence of the  $\chi'$  and  $\chi''$  components of the ac magnetic susceptibility for **3-Dy** measured at various ac frequencies under zero dc field (a) and under the optimal dc field (b).

**Fig. S64** The frequency dependent  $\chi'$  and  $\chi''$  signals of **3-Dy** measured under 0 Oe dc and 5 Oe ac fields (a) and under 1200 Oe dc and 5 Oe ac fields (b).

**Fig. S65** Temperature dependence of the  $\chi'$  and  $\chi''$  components of the ac magnetic susceptibility for **3\*-Dy** measured at various ac frequencies under zero dc field (a) and under the optimal dc field (b).

**Fig. S66** The frequency dependent  $\chi'$  and  $\chi''$  signals of **3\*-Dy** measured under 0 Oe dc and 5 Oe ac fields (a). The frequency dependent  $\chi'$  and  $\chi''$  signals of **3\*-Dy** measured under a 2600 Oe dc field and a 5 Oe ac field in the 7.6–9.1 K temperature range (b).

**Fig. S67** Field dependence of the  $\chi''$  component of ac susceptibility components after irradiation with  $\omega = 100$  Hz at 2 K of **2\*-Dy**.

**Fig. S68** Field dependence of the  $\chi''$  component of ac susceptibility components after irradiation with  $\omega = 1000$  Hz at 2 K of **3\*-Dy**.

**Fig. S69** Arrhenius plots for the magnetic relaxation process after irradiation based on the peak values of  $\chi''$  in the temperature-dependent ac susceptibility data of **2\*-Dy**. The red full line corresponds to a linear fit.

**Table S1.** Crystallographic data for **1-Dy**, **2-Dy**, and **3-Dy**.

**Table S2.** Selected bond lengths (Å) and angles (°) for **1-Dy** at 150 K.

**Table S3.** Selected bond lengths (Å) and angles (°) for **2-Dy** at 150 K.

**Table S4.** Selected bond lengths (Å) and angles (°) for **3-Dy** at 100 K.

**Table S5.** Continuous Shape Measure (CShM) analyses of geometries for **1-Dy** and by SHAPE 2.0 Software.

**Table S6.** Continuous Shape Measure (CShM) analyses of geometries for **2-Dy** and by SHAPE 2.0 Software.

**Table S7.** Continuous Shape Measure (CShM) analyses of geometries for **3-Dy** and by SHAPE 2.0 Software.

**Table S8.** Details of Hydrogen Bond Interactions in **1-Dy** at 150 K.

**Table S9.** Details of Hydrogen Bond Interactions in **2-Dy** at 150 K.

**Table S10.** Details of Hydrogen Bond Interactions in **3-Dy** at 150 K.

**Table S11** The Cole-Cole fitting parameters of **3\*-Dy** from 7.6 K to 9.1 K based on the generalized Debye law.

## Measurements:

Elemental analyses (for C, H, and N) were performed on a Perkin-Elmer 240C analyzer (Perkin-Elmer, USA). The thermogravimetric (TG) analyses were performed under a N<sub>2</sub> atmosphere on a Rigaku standard TG-DTA (differential thermal analysis) analyzer. IR curves for all compounds were measured on a FT-IR spectrometer (MAGNA-560 (Nicolet)) at room temperature with KBr pellets. The time-dependent luminescence spectra were performed on a Hitachi F-4700 Fluorescence spectrometer. The UV-Vis spectrometer was recorded on a Puxi Tu-1901 spectrophotometer using BaSO<sub>4</sub> as a reference. The room temperature EPR spectroscopy was recorded on a CIQTEK EPR200-Plus with continuous-wave X band frequency. <sup>1</sup>H NMR spectra were recorded on a JNM-ECZ600R/S1 400 MHz spectrometer in DMSO-*d*<sub>6</sub> at room temperature. The magnetic susceptibility measurements of the samples were recorded on a Quantum Design MPMS magnetometer. All data were corrected for diamagnetic contributions from the eicosane and core diamagnetism estimated using Pascal's constants. Powder X-ray diffraction (PXRD) spectra were performed through Rigaku standard MiniFlex600 and HyPix diffractometers. Simulation of the PXRD curve was carried out by the single-crystal data and diffraction-crystal module of the Mercury (Hg) program. A high-power UVLED spot lamp source (HEIGHT-LED, HTLD-4II) (365 nm) were equipped to prepare the photo-responsive experiments.

## Experimental

### Synthesis of Me-4-arylethene

In a 100-mL flask, triethyl phosphite (15 mmol) and 4-methylbenzyl chloride (15 mmol) were combined and stirred under reflux for 4 hours. After cooling the reaction mixture to room temperature without isolating the intermediate 4-methylbenzyl triethyl phosphite, pyridine-4-carbaldehyde (12 mmol) and tetrahydrofuran (THF, 20 mL) were added sequentially. Sodium hydride (NaH, 45 mmol) was then introduced gradually under ice-water cooling. The resulting mixture was heated under reflux for 1 hour. Upon completion, the reaction was cooled to room temperature and poured into a beaker containing 100 mL of ice-water under vigorous stirring. Solid precipitates formed immediately, which were collected by filtration and subsequently recrystallized from anhydrous ethanol. White solid. 58% yield. <sup>1</sup>H NMR (400 MHz, DMSO-*d*<sub>6</sub>) δ 8.53 (d, 2H), 7.56-7.49 (m, 4H), 7.23-7.11 (m, 4H), 2.32 (s, 3H).

### Synthesis of H-4-arylethene

In a 100 mL flask, triethyl phosphite (15 mmol) and benzyl chloride (15 mmol) were mixed and stirred under reflux for 4 hours. After cooling the reaction mixture to room temperature without isolating the intermediate benzyl triethyl phosphite, pyridine-4-carbaldehyde (12 mmol) and tetrahydrofuran (THF, 20 mL) were added successively. Sodium hydride (NaH, 45 mmol) was then added slowly under ice-water cooling. The resulting mixture was heated under reflux for 1 hour. After completion, the reaction was cooled to room temperature and poured into a beaker containing 100 mL of ice-water under vigorous stirring. Solid precipitates formed immediately, which were collected by filtration and recrystallized from anhydrous ethanol. White solid. 66% yield.  $^1\text{H NMR}$  (400 MHz,  $\text{DMSO-}d_6$ )  $\delta$  8.54 (t, 2H), 7.67 (t, 2H), 7.57 (t, 3H), 7.42 (t, 2H), 7.34 (t, 1H), 7.27 (d, 2H).

#### **Synthesis of Cl-4-arylethene**

In a 100 mL flask, triethyl phosphite (15 mmol) and 4-chlorobenzyl chloride (15 mmol) were mixed and stirred under reflux for 4 hours. After cooling the reaction mixture to room temperature without isolating the intermediate 4-chlorobenzyl triethyl phosphite, pyridine-4-carbaldehyde (12 mmol) and tetrahydrofuran (THF, 20 mL) were added successively. Sodium hydride (NaH, 45 mmol) was then added slowly under ice-water cooling. The resulting mixture was heated under reflux for 1 hour. Upon completion, the reaction was cooled to room temperature and poured into a beaker containing 100 mL of ice-water under vigorous stirring. A solid precipitated immediately, which was collected by filtration and recrystallized from anhydrous ethanol. White solid. 45% yield.  $^1\text{H NMR}$  (400 MHz,  $\text{DMSO-}d_6$ ) 7.56-7.53 (m, 4H), 7.48-7.43 (m, 2H), 7.35 (d, 2H), 7.17 (t, 1H).

#### **(H-4-Me-4spy)[Dy(H<sub>2</sub>-HEDP)<sub>2</sub>] (1-Dy)**

(H-4-Me-4spy)[Dy(H<sub>2</sub>-HEDP)<sub>2</sub>] (**1-Dy**): Dy<sub>2</sub>O<sub>3</sub> (0.0423 g, 0.112 mmol), Me-4-spy (0.0285 g, 0.146 mmol), HEDP (0.0981 g, 0.438 mmol) were dissolved in the mixed solvents of CH<sub>3</sub>OH/H<sub>2</sub>O (2 mL / 2 mL). The mixture was placed in a 20 mL Teflon-lined glass vial, and heated at 90 °C for 4 days. The Crystals were obtained after slowly cooling the mixture for 24 h at room temperature. Yield: ca. 25% based on Dy<sub>2</sub>O<sub>3</sub>. Elemental analysis for **1-Dy** (%): calcd for C<sub>18</sub>H<sub>24</sub>NO<sub>14</sub>P<sub>4</sub>Dy (764.76): C, 28.24; H,

3.14; N, 1.83. Found: C, 28.22; H, 3.17; N, 1.82. IR of **1-Dy** (KBr pellets,  $\text{cm}^{-1}$ ): 1639(s), 1507(s), 1449(w), 1147(s), 1054(w), 978(s), 903(m), 814(s), 755(s), 721(m), 690(w), 640(s), 534(m), 448(m). **1\*-Dy** was obtained by Xe-lamp irradiation of compound **1-Dy** at room temperature for 60 min. For complex **1\*-Dy** (%): calcd for  $\text{C}_{18}\text{H}_{24}\text{NO}_{14}\text{P}_4\text{Dy}$  (764.76): C, 28.24; H, 3.14; N, 1.83. Found: C, 28.25; H, 3.13; N, 1.84. IR of **1\*-Dy** (KBr pellets,  $\text{cm}^{-1}$ ): 1621(w), 1508(s), 1445(w), 1147(s), 1055(w), 918(m), 646(s), 538(m), 448(m).

#### **(H-4-spy)[Dy(H<sub>2</sub>-HEDP)<sub>2</sub>] (2-Dy)**

(H-4-spy)[Dy(H<sub>2</sub>-HEDP)<sub>2</sub>] (**2-Dy**): Dy<sub>2</sub>O<sub>3</sub> (0.0423 g, 0.112 mmol), 4-spy (0.0265 g, 0.146 mmol), HEDP (0.0981 g, 0.438 mmol) were dissolved in the mixed solvents of CH<sub>3</sub>OH/H<sub>2</sub>O (2 mL / 2 mL). The mixture was placed in a 20 mL Teflon-lined glass vial, and heated at 90 °C for 4 days. The Crystals were obtained after slowly cooling the mixture for 24 h at room temperature. Yield: ca. 37% based on Dy<sub>2</sub>O<sub>3</sub>. Elemental analysis for **2-Dy** (%): calcd for  $\text{C}_{17}\text{H}_{24}\text{NO}_{14}\text{P}_4\text{Dy}$  (752.75): C, 27.10; H, 3.19; N, 1.86. Found: C, 27.13; H, 3.21; N, 1.83. IR of **2-Dy** (KBr pellets,  $\text{cm}^{-1}$ ): 1639(s), 1507(s), 1449(w), 1147(s), 1054(w), 978(s), 903(m), 814(s), 755(s), 721(m), 690(w), 640(s), 534(m). **2\*-Dy** was obtained by Xe-lamp irradiation of compound **2-Dy** at room temperature for 60 min. For complex **2\*-Dy** (%): calcd for  $\text{C}_{17}\text{H}_{24}\text{NO}_{14}\text{P}_4\text{Dy}$  (752.75): C, 27.10; H, 3.19; N, 1.86. Found: C, 27.11; H, 3.19; N, 1.84. IR of **2\*-Dy** (KBr pellets,  $\text{cm}^{-1}$ ): 1639(s), 1507(s), 1449(w), 1144(w), 1054(w), 903(m), 814(s), 732(m), 702(s), 640(s), 534(m).

#### **(H-4-Cl-4spy)[Dy(H<sub>2</sub>-HEDP)<sub>2</sub>] (3-Dy)**

(H-4-Cl-4spy)[Dy(H<sub>2</sub>-HEDP)<sub>2</sub>] (**3-Dy**): Dy<sub>2</sub>O<sub>3</sub> (0.0423 g, 0.112 mmol), Cl-4-spy (0.0316 g, 0.146 mmol), HEDP (0.0981 g, 0.438 mmol) were dissolved in the mixed solvents of CH<sub>3</sub>OH/H<sub>2</sub>O (2 mL / 2 mL). The mixture was placed in a 20 mL Teflon-lined glass vial, and heated at 90 °C for 4 days. The Crystals were obtained after slowly cooling the mixture for 24 h at room temperature. Yield: ca. 52% based on Dy<sub>2</sub>O<sub>3</sub>. Elemental analysis for **3-Dy** (%): calcd for  $\text{C}_{17}\text{H}_{24}\text{NO}_{14}\text{P}_4\text{DyCl}$  (788.20): C, 25.88; H, 3.04; N, 1.77. Found: C, 25.84; H, 3.08; N, 1.74. IR of **3-Dy** (KBr pellets,  $\text{cm}^{-1}$ ):

1623(s), 1507(s), 1444(w), 1146(w), 1060(w), 978(s), 911(m), 830(s), 644(m), 549(m). **3\*-Dy** was obtained by Xe-lamp irradiation of compound **3-Dy** at room temperature for 60 min. For complex **3\*-Dy** (%): calcd for  $C_{17}H_{24}NO_{14}P_4DyCl$  (788.20): C, 25.88; H, 3.04; N, 1.77. Found: C, 25.83; H, 3.04; N, 1.77. IR of **3\*-Dy** (KBr pellets,  $cm^{-1}$ ): 1635(s), 1494(w), 1150(w), 1054(w), 906(m), 810(s), 765(s), 691(m), 647(s), 593(s), 530(m), 454(m).

#### **(H-4-Me-4spy)[Y(H<sub>2</sub>-HEDP)<sub>2</sub>] (1-Y)**

(H-4-Me-4spy)[Y(H<sub>2</sub>-HEDP)<sub>2</sub>] (**1-Y**). The synthesis of compound **1-Y** was used by the same method as compound **1-Dy** but using  $Y_2O_3$  (0.045 g, 0.10 mmol). Yield: ca. 35% based on  $Y_2O_3$ . Elemental analysis for **1-Y** (%): calcd for  $C_{18}H_{24}NO_{14}P_4Y$  (691.17): C, 31.25; H, 3.47; N, 2.02. Found: C, 31.20; H, 3.50; N, 2.01. IR (KBr pellets,  $cm^{-1}$ ): 1628(s), 1592(s), 1508(s), 1236(w), 1150(w), 1054(w), 978(s), 918(m), 833(m), 645(m), 532(w), 486(w), 406(s). **1\*-Y** was obtained by Xe-lamp irradiation of compound **1-Y** at room temperature for 60 min. For complex **1\*-Y** (%): calcd for  $C_{18}H_{24}NO_{14}P_4Y$  (691.17): C, 31.25; H, 3.47; N, 2.02. Found: C, 31.20; H, 3.50; N, 2.01. IR (KBr pellets,  $cm^{-1}$ ): 1628(s), 1150(w), 1042(w), 987(s), 938(m), 828(m), 675(m), 549(w), 466(w).

#### **(H-4-spy)[Y(H<sub>2</sub>-HEDP)<sub>2</sub>] (2-Y)**

(H-4-spy)[Y(H<sub>2</sub>-HEDP)<sub>2</sub>] (**2-Y**). The synthesis of compound **2-Y** was used by the same method as compound **1-Dy** but using  $Y_2O_3$  (0.045 g, 0.10 mmol). Yield: ca. 41% based on  $Y_2O_3$ . Elemental analysis for **2-Y** (%): calcd for  $C_{17}H_{24}NO_{14}P_4Y$  (679.14): C, 30.04; H, 3.53; N, 2.06. Found: C, 30.03; H, 3.52; N, 2.07. IR (KBr pellets,  $cm^{-1}$ ): 1620(s), 1505(s), 1449(s), 1148(m), 1066(w), 972(m), 917(m), 814(s), 757(s), 644(s), 524(w), 483(s), 443(w). **2\*-Y** was obtained by Xe-lamp irradiation of compound **2-Y** at room temperature for 60 min. For complex **2\*-Y** (%): calcd for  $C_{17}H_{24}NO_{14}P_4Y$  (679.14): C, 30.04; H, 3.53; N, 2.06. Found: C, 30.05; H, 3.52; N, 2.05. IR (KBr pellets,  $cm^{-1}$ ): 1617(s), 1505(s), 1449(s), 1148(m), 1066(w), 917(m), 814(s), 757(m), 644(s), 524(w), 483(s), 447(w).

#### **(H-4-Cl-4spy)[Y(H<sub>2</sub>-HEDP)<sub>2</sub>] (3-Y)**

(H-4-Cl-4spy)[Y(H<sub>2</sub>-HEDP)<sub>2</sub>] (**3-Y**). The synthesis of compound **3-Y** was used by the same method as compound **1-Dy** but using Y<sub>2</sub>O<sub>3</sub> (0.045 g, 0.10 mmol). Yield: ca. 48% based on Y<sub>2</sub>O<sub>3</sub>. Elemental analysis for **3-Y** (%): calcd for C<sub>17</sub>H<sub>24</sub>NO<sub>14</sub>P<sub>4</sub>YCl (715.62): C, 28.51; H, 3.35; N, 1.96. Found: C, 28.54; H, 3.37; N, 1.98. IR (KBr pellets, cm<sup>-1</sup>): 1634(s), 1502(m), 1149(s), 1060(w), 982(m), 910(s), 810(s), 766(s), 733(s), 690(s), 643(s), 592(s), 540(w), 433(w). **3\*-Y** was obtained by Xe-lamp irradiation of compound **3-Y** at room temperature for 60 min. For complex **3\*-Y** (%): calcd for C<sub>17</sub>H<sub>24</sub>NO<sub>14</sub>P<sub>4</sub>YCl (715.62): C, 28.51; H, 3.35; N, 1.96. Found: C, 28.54; H, 3.37; N, 1.98. IR (KBr pellets, cm<sup>-1</sup>): 1634(s), 1502(m), 1149(m), 1044(w), 987(s), 934(s), 824(s), 666(m), 531(m), 432(w).

#### **(H-4-Me-4spy)[Gd(H<sub>2</sub>-HEDP)<sub>2</sub>] (1-Gd)**

(H-4-Me-4spy)[Gd(H<sub>2</sub>-HEDP)<sub>2</sub>] (**1-Gd**). The synthesis of compound **1-Gd** was used by the same method as compound **1-Dy** but using Gd<sub>2</sub>O<sub>3</sub> (0.045 g, 0.10 mmol). Yield: ca. 35% based on Gd<sub>2</sub>O<sub>3</sub>. Elemental analysis for **1-Gd** (%): calcd for C<sub>18</sub>H<sub>24</sub>NO<sub>14</sub>P<sub>4</sub>Gd (759.51): C, 28.44; H, 3.16; N, 1.84. Found: C, 28.42; H, 3.17; N, 1.82. IR (KBr pellets, cm<sup>-1</sup>): 1627(m), 1508(s), 1448(s), 1150(w), 1054(w), 978(s), 918(m), 833(m), 645(m), 541(w), 447(m). **1\*-Gd** was obtained by Xe-lamp irradiation of compound **1-Gd** at room temperature for 60 min. For complex **1\*-Gd** (%): calcd for C<sub>18</sub>H<sub>24</sub>NO<sub>14</sub>P<sub>4</sub>Gd (759.51): C, 28.44; H, 3.16; N, 1.84. Found: C, 28.42; H, 3.17; N, 1.82. IR (KBr pellets, cm<sup>-1</sup>): 1639(s), 1508(s), 1442(s), 1150(w), 1054(s), 910(s), 645(m), 549(s), 532(w), 452(s).

#### **(H-4-spy)[Gd(H<sub>2</sub>-HEDP)<sub>2</sub>] (2-Gd)**

(H-4-spy)[Gd(H<sub>2</sub>-HEDP)<sub>2</sub>] (**2-Gd**). The synthesis of compound **2-Gd** was used by the same method as compound **1-Dy** but using Gd<sub>2</sub>O<sub>3</sub> (0.045 g, 0.10 mmol). Yield: ca. 41% based on Gd<sub>2</sub>O<sub>3</sub>. Elemental analysis for **2-Gd** (%): calcd for C<sub>17</sub>H<sub>24</sub>NO<sub>14</sub>P<sub>4</sub>Gd (747.5): C, 27.29; H, 3.21; N, 1.87. Found: C, 27.31; H, 3.24; N, 1.88. IR (KBr pellets, cm<sup>-1</sup>): 1620(s), 1505(s), 1449(s), 1363(m), 1148(m), 1066(w), 972(m), 917(m), 814(s),

705(m), 651(s), 544(w), 449(m). **2\*-Gd** was obtained by Xe-lamp irradiation of compound **2-Gd** at room temperature for 60 min. For complex **2\*-Gd** (%): calcd for C<sub>17</sub>H<sub>24</sub>NO<sub>14</sub>P<sub>4</sub>Gd (747.5): C, 27.29; H, 3.21; N, 1.87. Found: C, 27.30; H, 3.24; N, 1.88. IR (KBr pellets, cm<sup>-1</sup>): 1635(s), 1505(s), 1449(s), 1363(m), 1141(m), 1066(w), 972(s), 917(m), 814(s), 705(m), 651(s), 544(w), 451(m).

### **(H-4-Cl-4spy)[Gd(H<sub>2</sub>-HEDP)<sub>2</sub>] (3-Gd)**

(H-4-Cl-4spy)[Gd(H<sub>2</sub>-HEDP)<sub>2</sub>] (**3-Gd**). The synthesis of compound **3-Gd** was used by the same method as compound **1-Dy** but using Gd<sub>2</sub>O<sub>3</sub> (0.045 g, 0.10 mmol). Yield: ca. 48% based on Gd<sub>2</sub>O<sub>3</sub>. Elemental analysis for **3-Gd** (%): calcd for C<sub>17</sub>H<sub>24</sub>NO<sub>14</sub>P<sub>4</sub>GdCl (783.96): C, 26.02; H, 3.06; N, 1.79. Found: C, 25.84; H, 3.08; N, 1.83. IR (KBr pellets, cm<sup>-1</sup>): 1641(s), 1491(m), 1142(s), 1060(w), 978(m), 910(w), 810(s), 737(m), 649(s), 543(m), 451(s), 433(m). **3\*-Gd** was obtained by Xe-lamp irradiation of compound **3-Gd** at room temperature for 60 min. For complex **3\*-Gd** (%): calcd for C<sub>17</sub>H<sub>24</sub>NO<sub>14</sub>P<sub>4</sub>GdCl (783.96): C, 26.02; H, 3.06; N, 1.79. Found: C, 25.84; H, 3.08; N, 1.83. IR (KBr pellets, cm<sup>-1</sup>): 1625(s), 1502(m), 1403(s), 1142(s), 1060(w), 974(m), 915(w), 810(s), 645(s), 543(m), 451(m), 433(m).

### **X-ray Crystallography**

The single-crystal XRD data of **1-Dy**, **2-Dy** and **3-Dy** were collected on a Rigaku XtaLAB Synergy R, DW system, HyPix diffractometer with Mo-K $\alpha$  radiation. The Olex2 software was used to solve the structures.<sup>[1]</sup> Detailed crystallographic data for complexes **1-Dy**, **2-Dy** and **3-Dy** was summarized in Tables S1, and the selected bond lengths and angles were listed in Table S2, S3 and S4. Full crystallographic data have been deposited with the CCDC-2523763 for **1-Dy**, 2528876 for **2-Dy** and 2523764 for **3-Dy**.

### **References**

1. O. V. Dolomanov; L. J. Bourhis; R. J. Gildea; J. A. K. Howard; H. Puschmann. OLEX2: a complete structure solution, refinement and analysis program. *J. Appl. Crystallogr.* **2009**, *42*, 339-341.

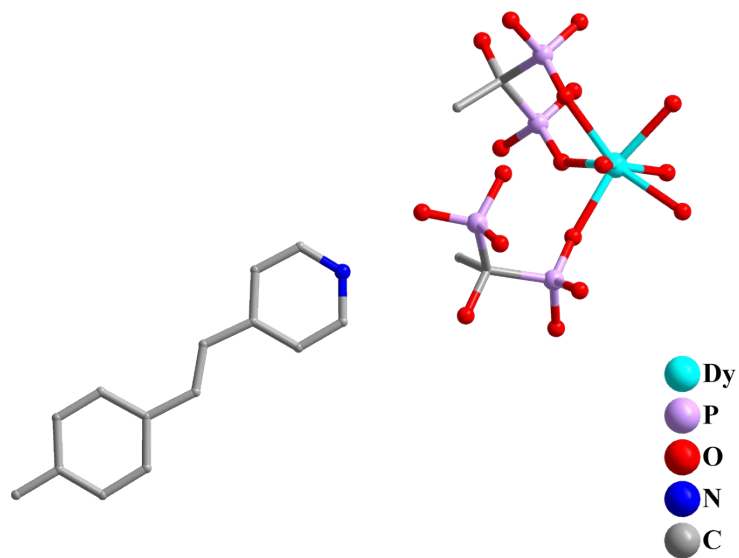

**Fig. S1** The asymmetric unit of compound 1-Dy.

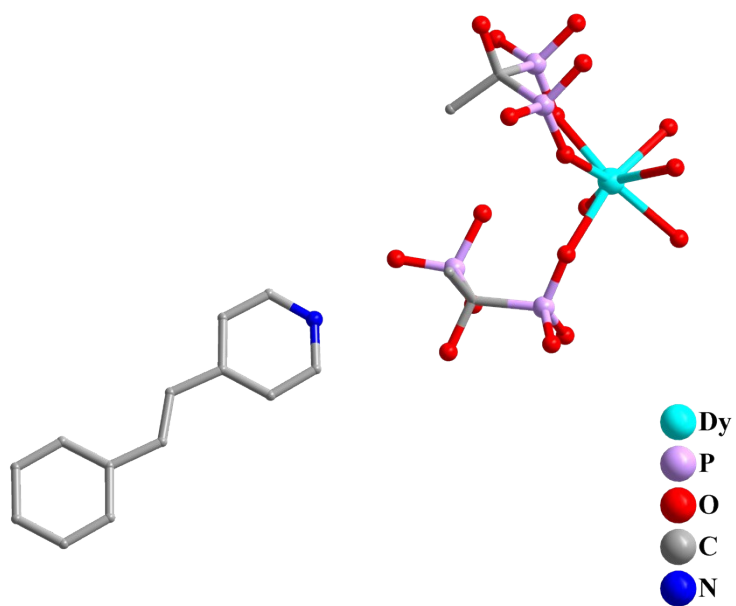

**Fig. S2** The asymmetric unit of compound 2-Dy.

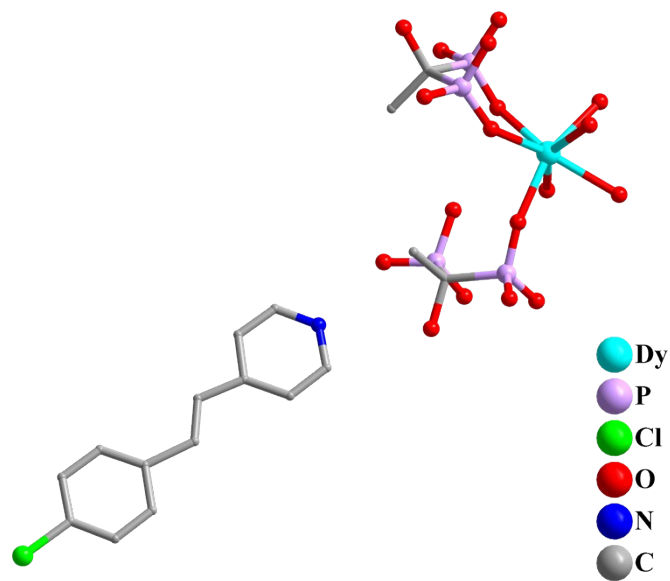

**Fig. S3** The asymmetric unit of compound **3-Dy**.

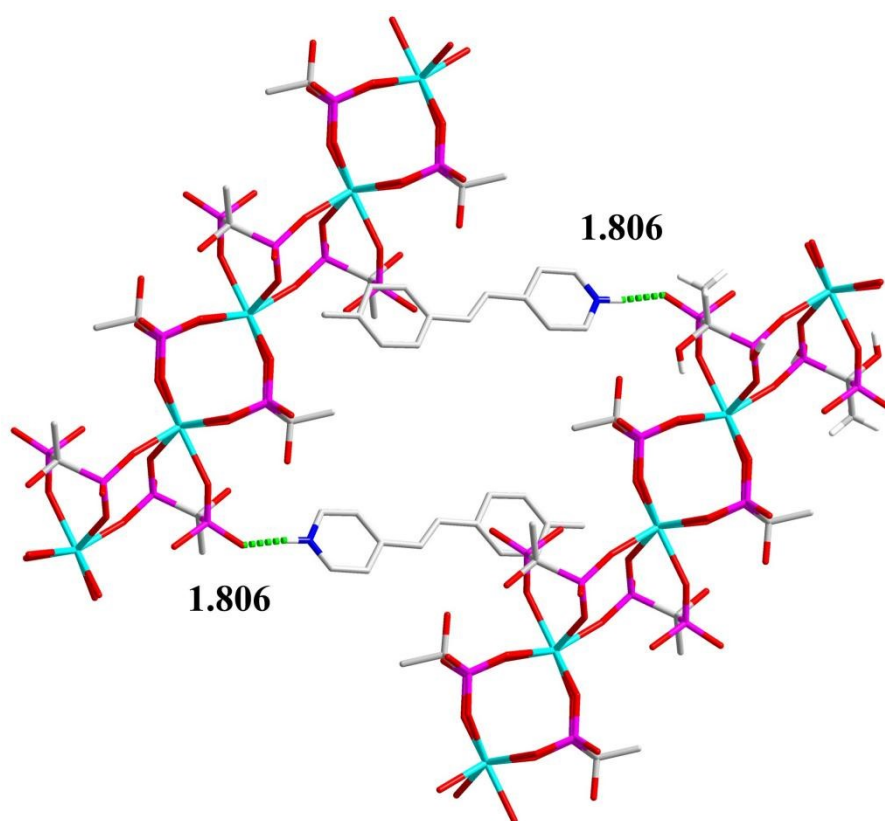

**Fig. S4** The packing mode of **1-Dy** with H-bonds is shown as dashed lines.

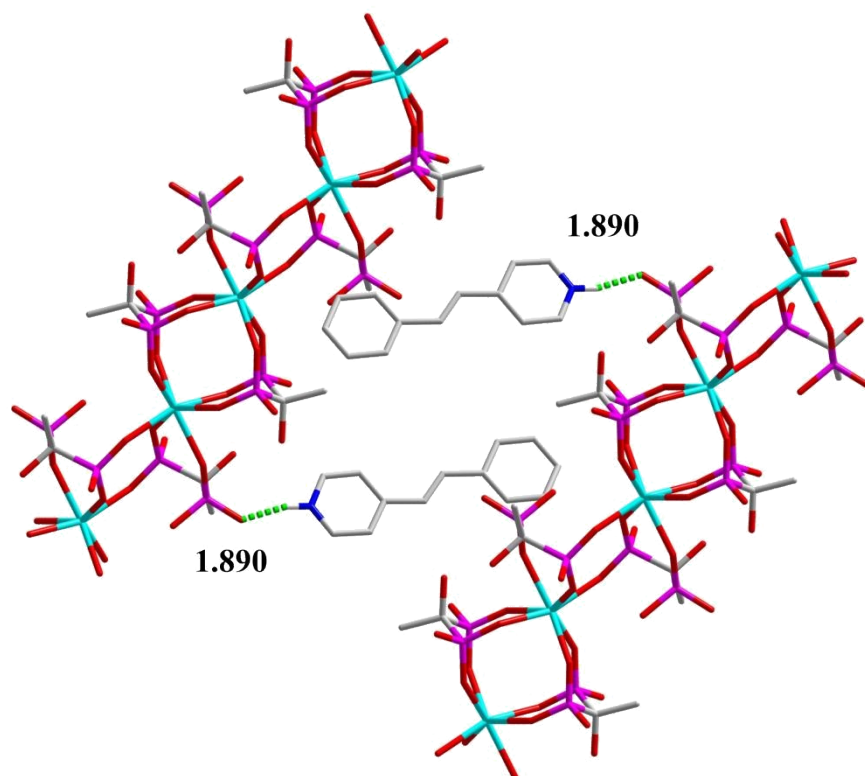

**Fig. S5** The packing mode of **2-Dy** with H-bonds is shown as dashed lines.

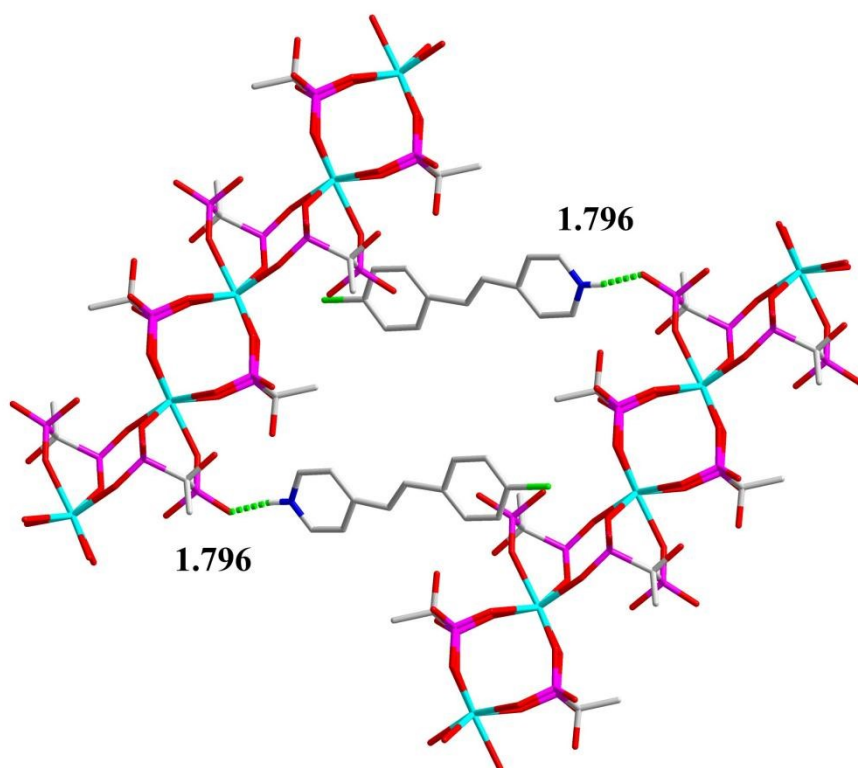

**Fig. S6** The packing mode of **3-Dy** with H-bonds is shown as dashed lines.

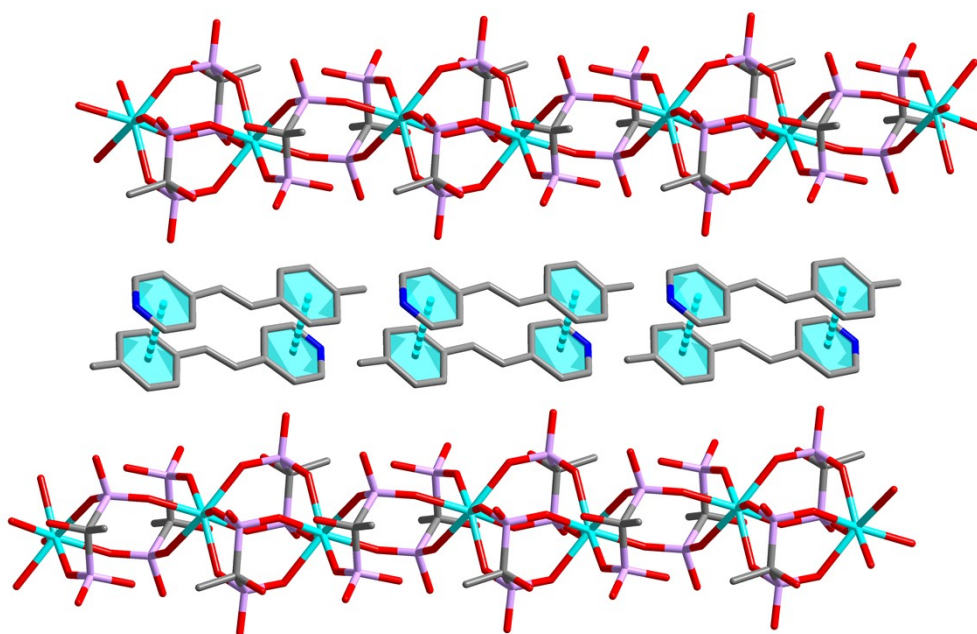

**Fig. S7** The  $\pi$ - $\pi$  stacking interaction between ligands in **1-Dy**.

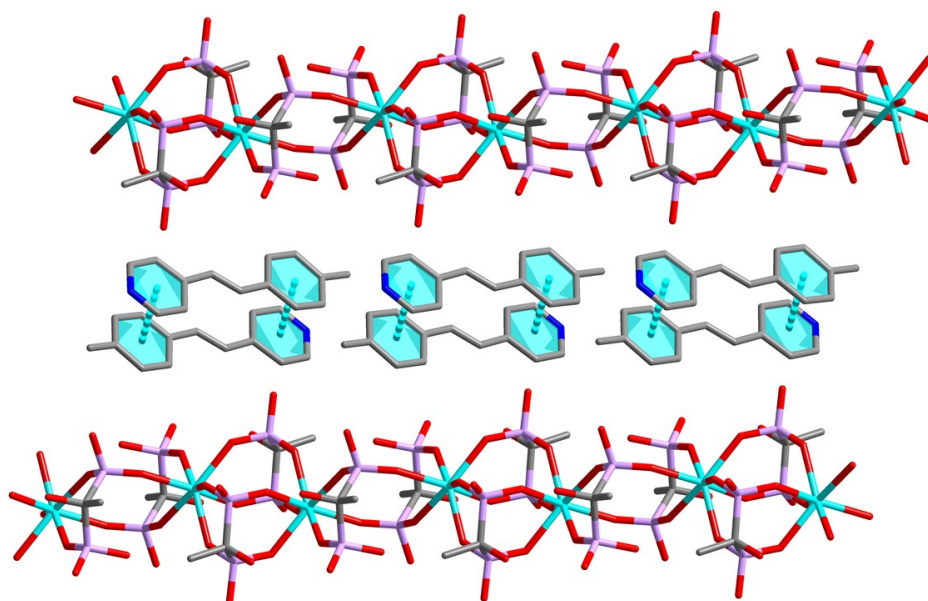

**Fig. S8** The  $\pi$ - $\pi$  stacking interaction between ligands in **2-Dy**.

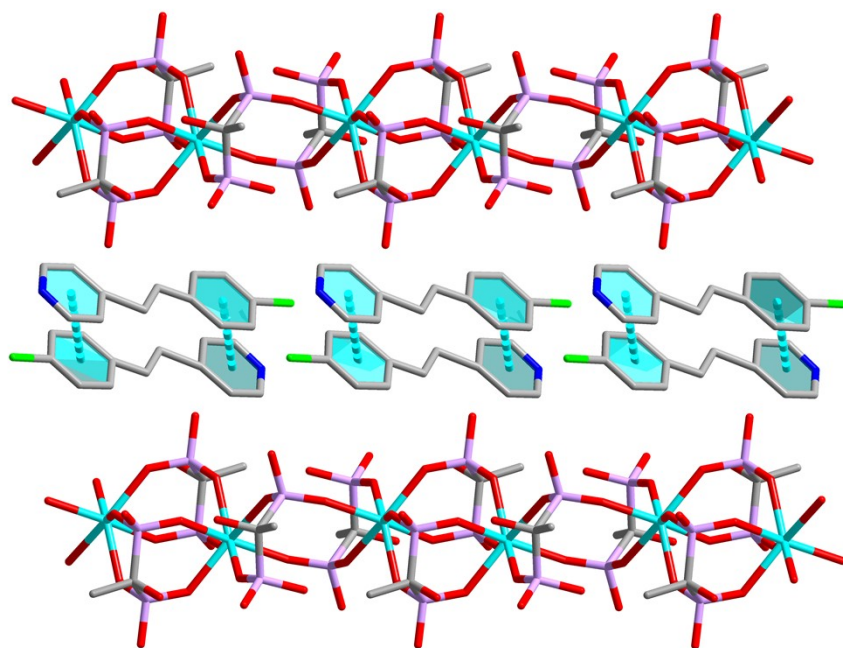

Fig. S9 The  $\pi$ - $\pi$  stacking interaction between ligands in 3-Dy.

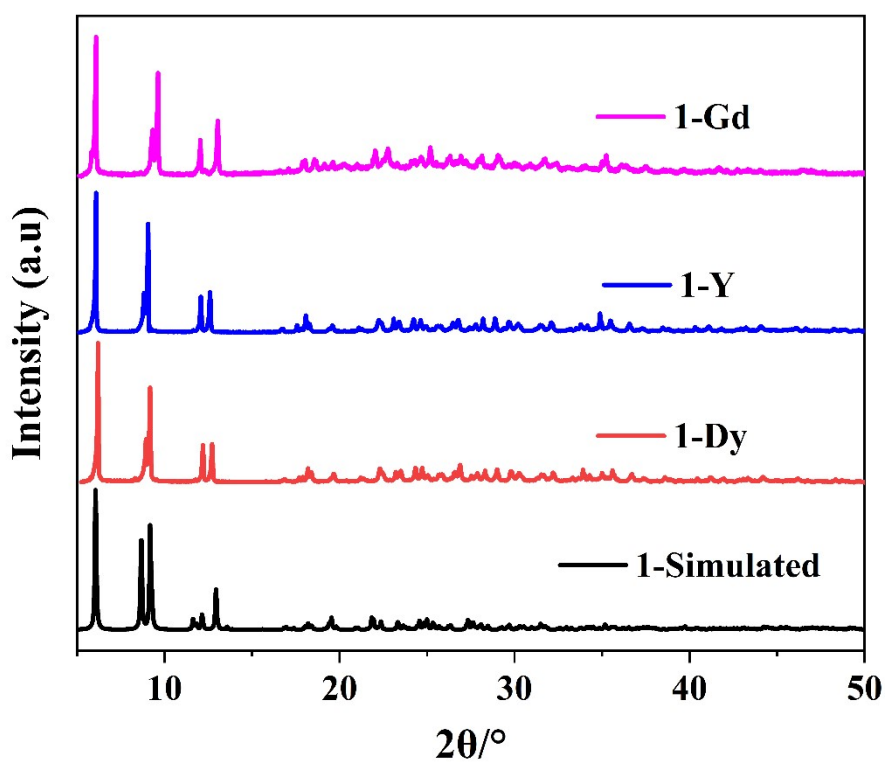

Fig. S10 PXRD patterns of simulated, experimental complexes 1-Dy, 1-Y, and 1-Gd.

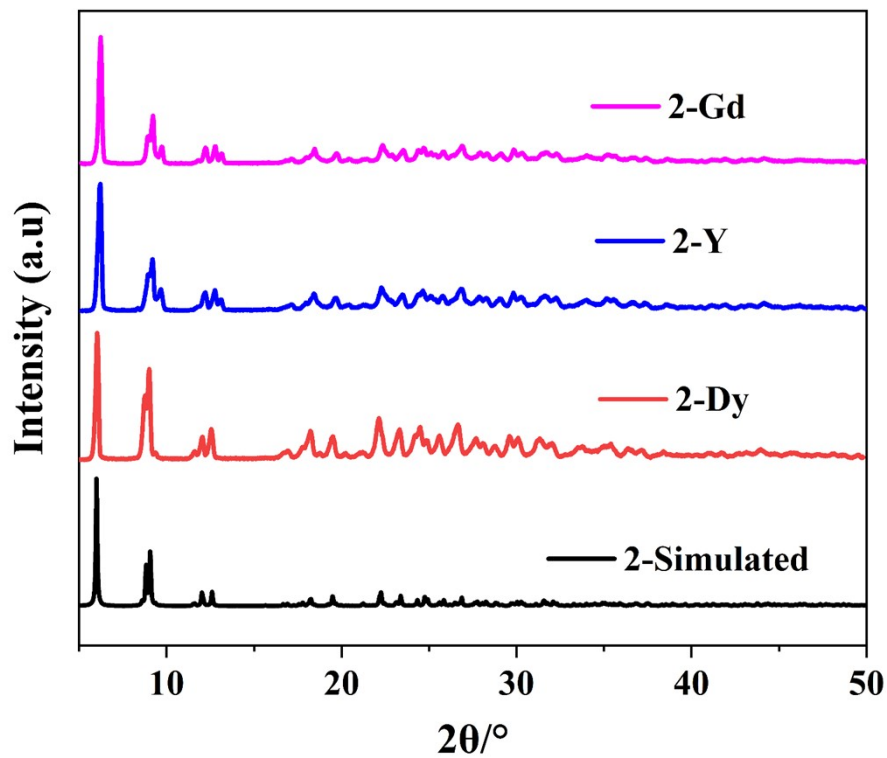

Fig. S11 PXR D patterns of simulated, experimental complexes 2-Dy, 2-Y, and 2-Gd.

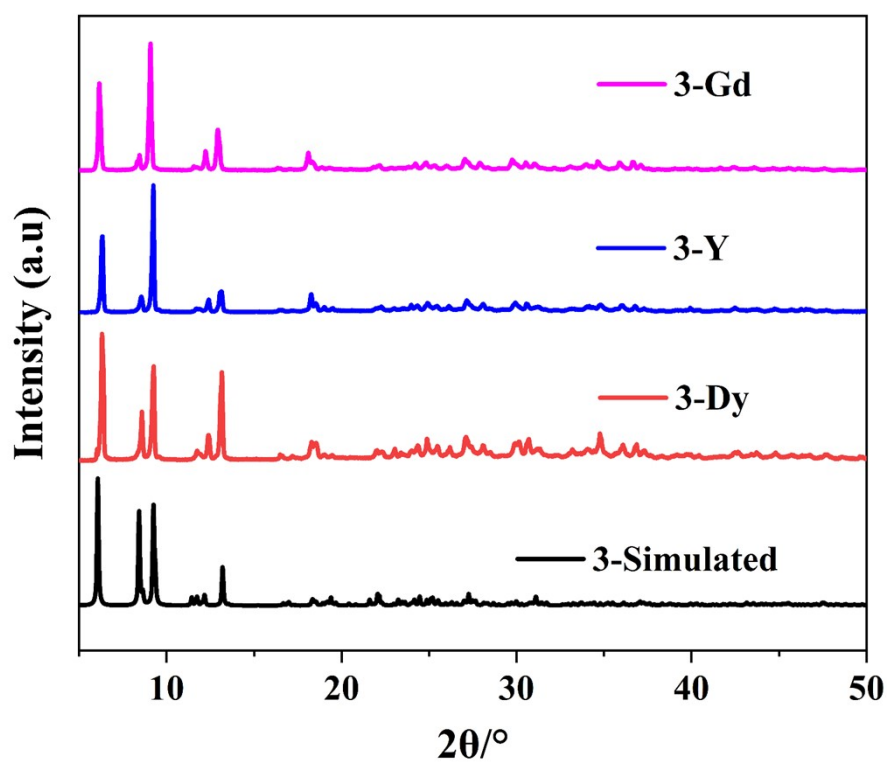

Fig. S12 PXR D patterns of simulated, experimental complexes 3-Dy, 3-Y, and 3-Gd.

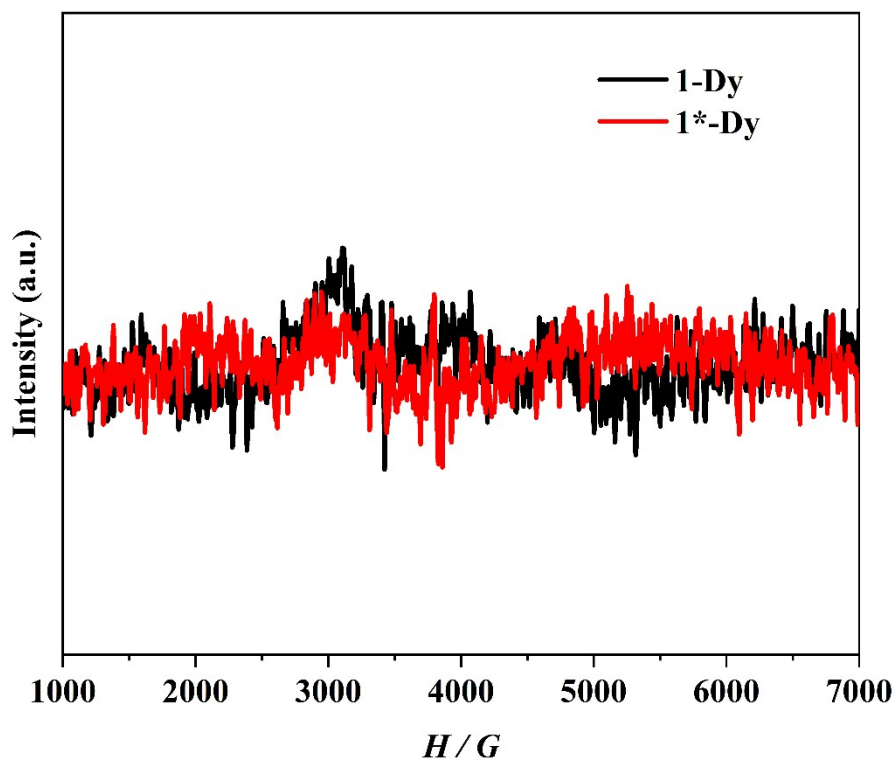

**Fig. S13** Solid-state EPR spectra of **1-Dy** before and after light irradiation recorded at room temperature at a frequency of 9.54 GHz.

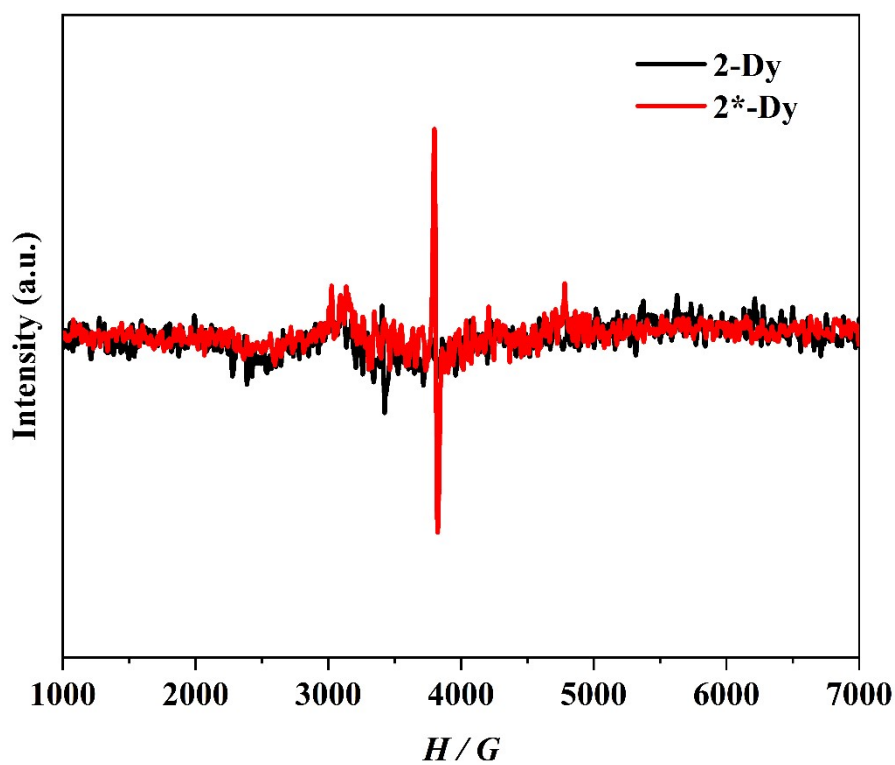

**Fig. S14** Solid-state EPR spectra of **2-Dy** before and after light irradiation recorded at room temperature at a frequency of 9.54 GHz.

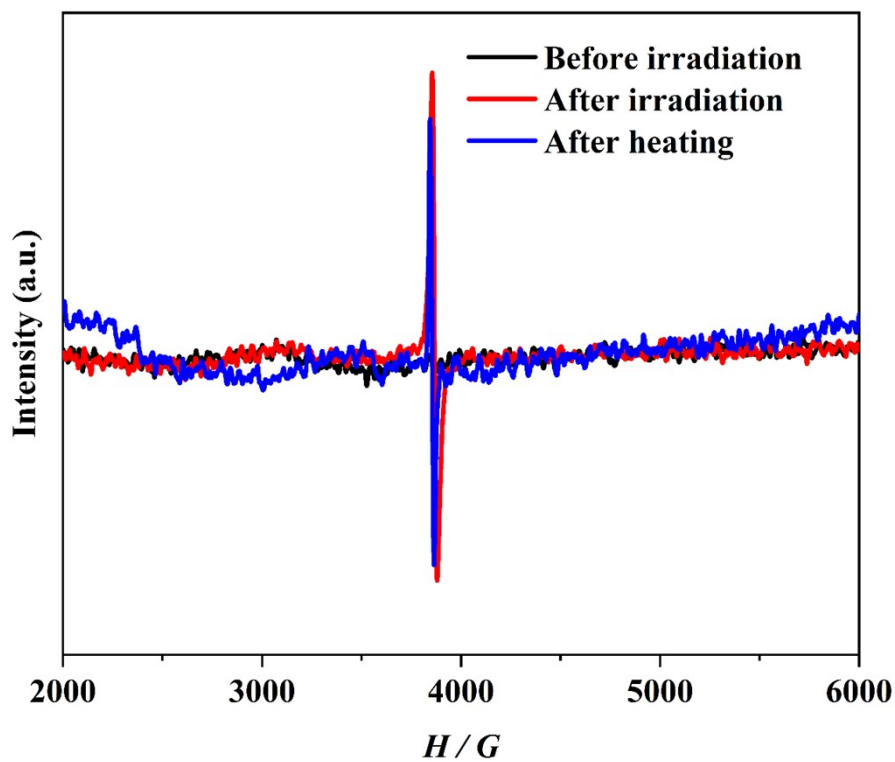

**Fig. S15** Solid-state EPR spectra of **3-Dy** before and after light irradiation and after heating recorded at room temperature at a frequency of 9.54 GHz.

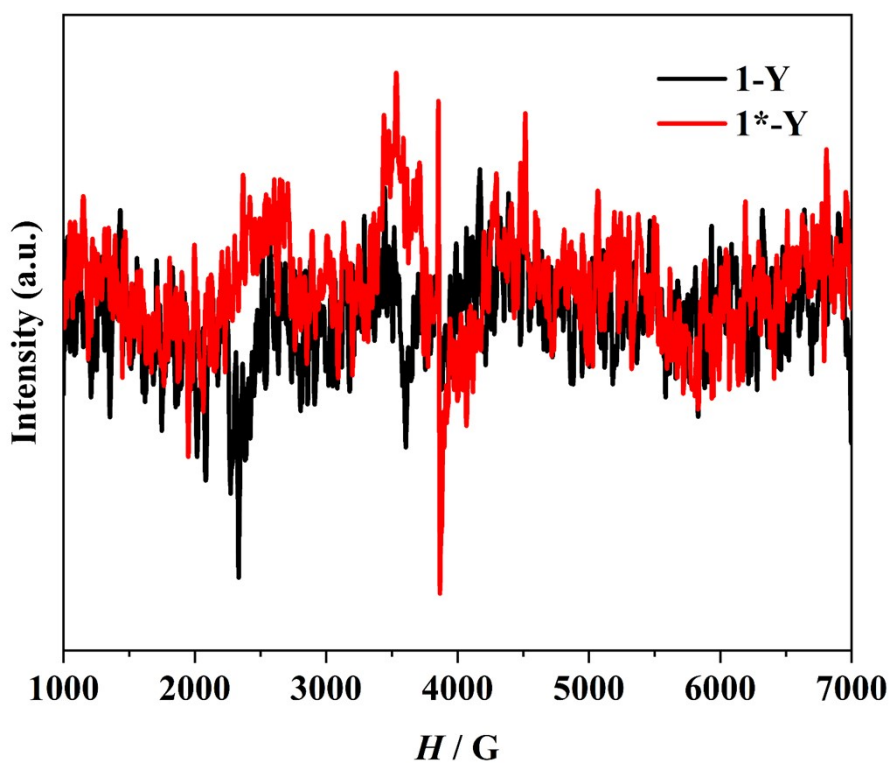

**Fig. S16** Solid-state EPR spectra of **1-Y** before and after light irradiation recorded at room temperature at a frequency of 9.54 GHz.

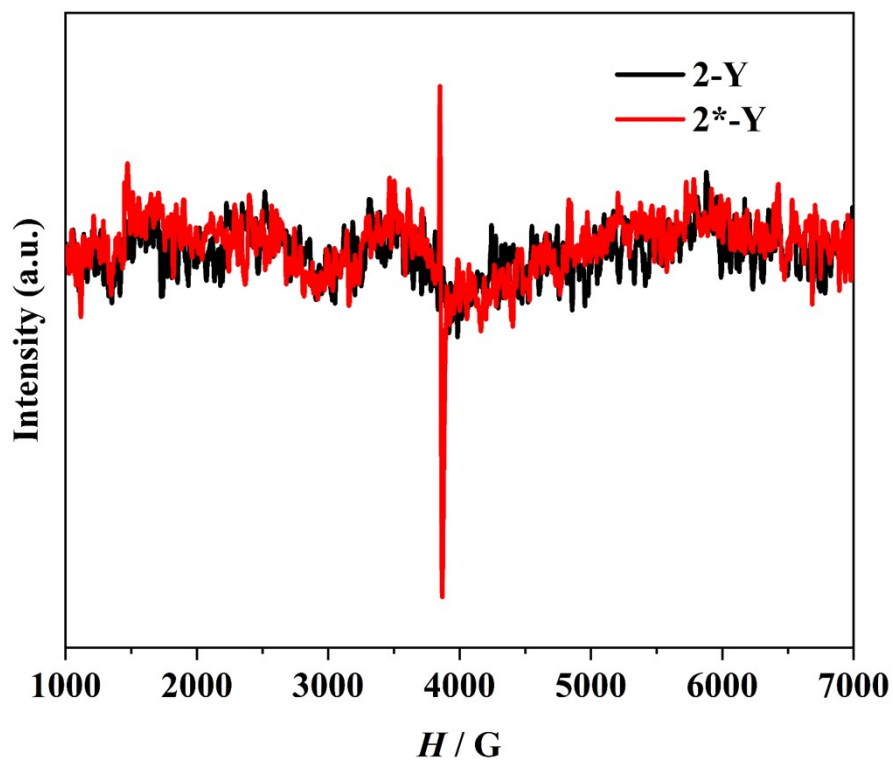

**Fig. S17** Solid-state EPR spectra of 2-Y before and after light irradiation recorded at room temperature at a frequency of 9.54 GHz.

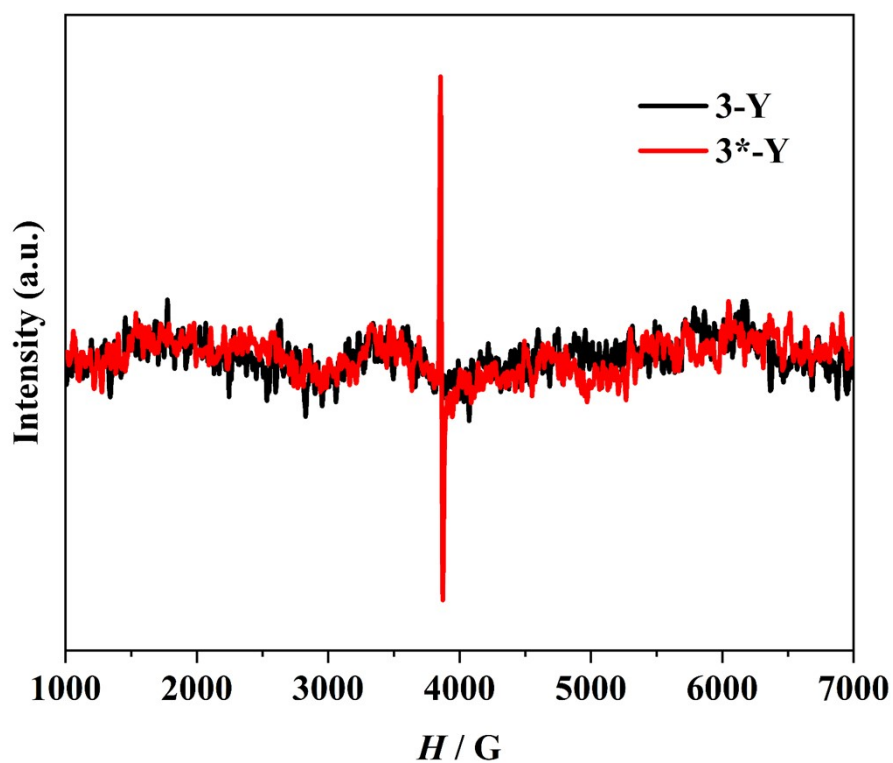

**Fig. S18** Solid-state EPR spectra of 3-Y before and after light irradiation recorded at room temperature at a frequency of 9.54 GHz.

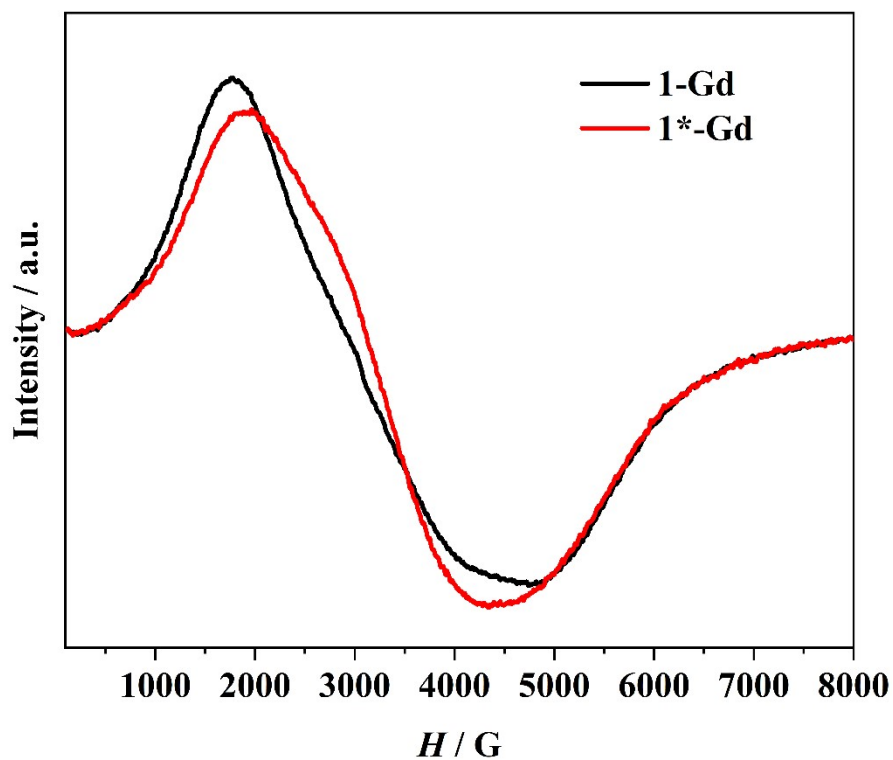

**Fig. S19** Solid-state EPR spectra of **1-Gd** before and after light irradiation recorded at room temperature at a frequency of 9.54 GHz.

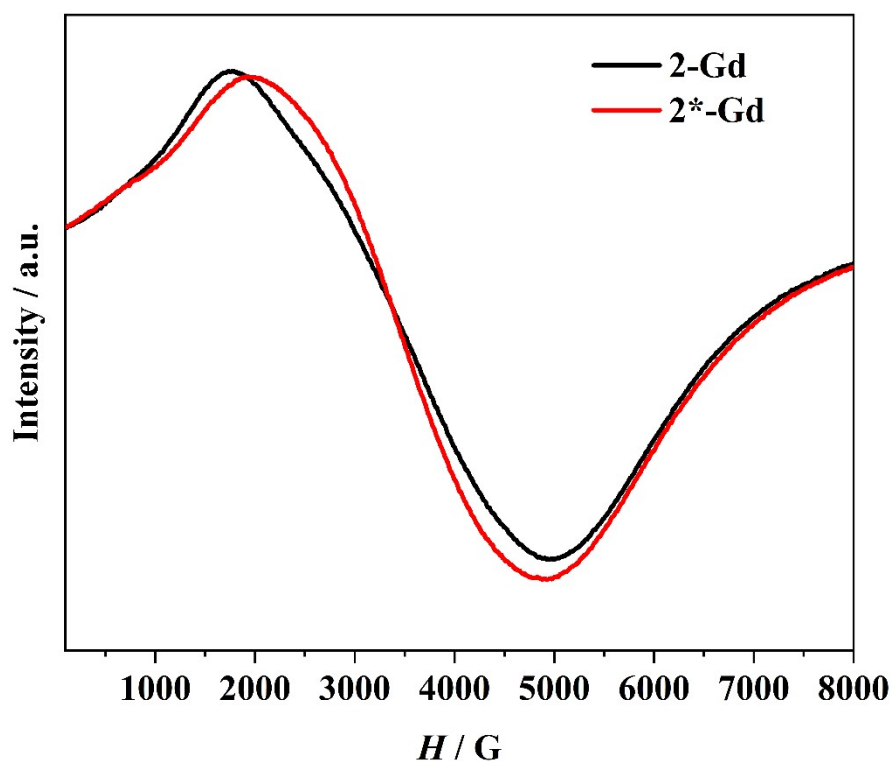

**Fig. S20** Solid-state EPR spectra of **2-Gd** before and after light irradiation recorded at room temperature at a frequency of 9.54 GHz.

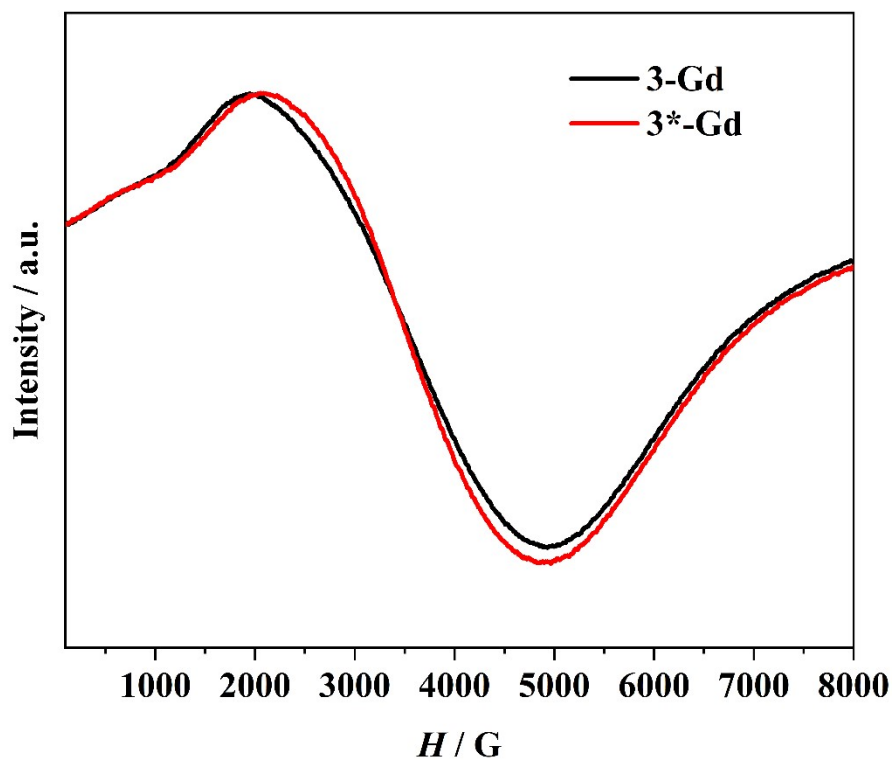

**Fig. S21** Solid-state EPR spectra of **3-Gd** before and after light irradiation recorded at room temperature at a frequency of 9.54 GHz.

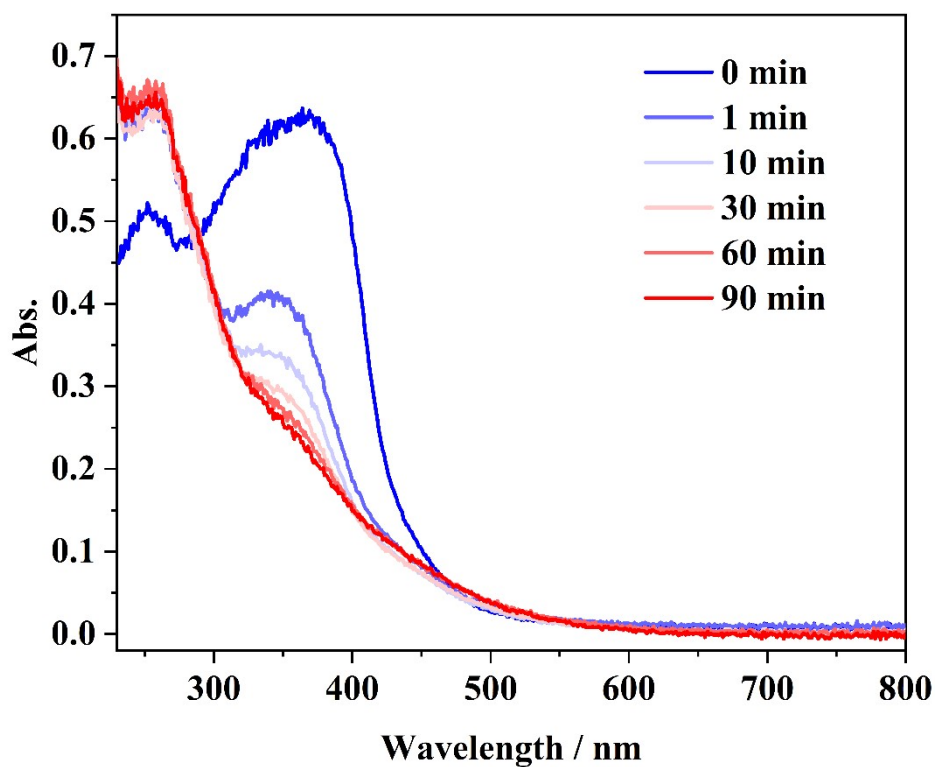

**Fig. S22** Solid-state UV-vis absorption spectra of **1-Gd** at different irradiation time.

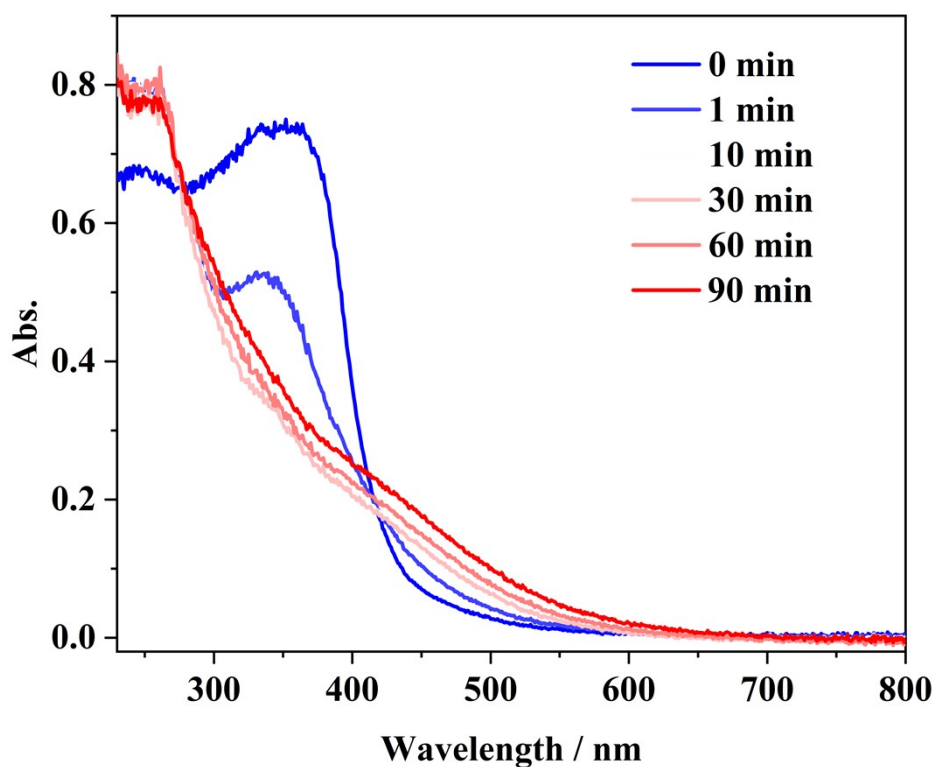

**Fig. S23** Solid-state UV-vis absorption spectra of 2-Gd at different irradiation time.

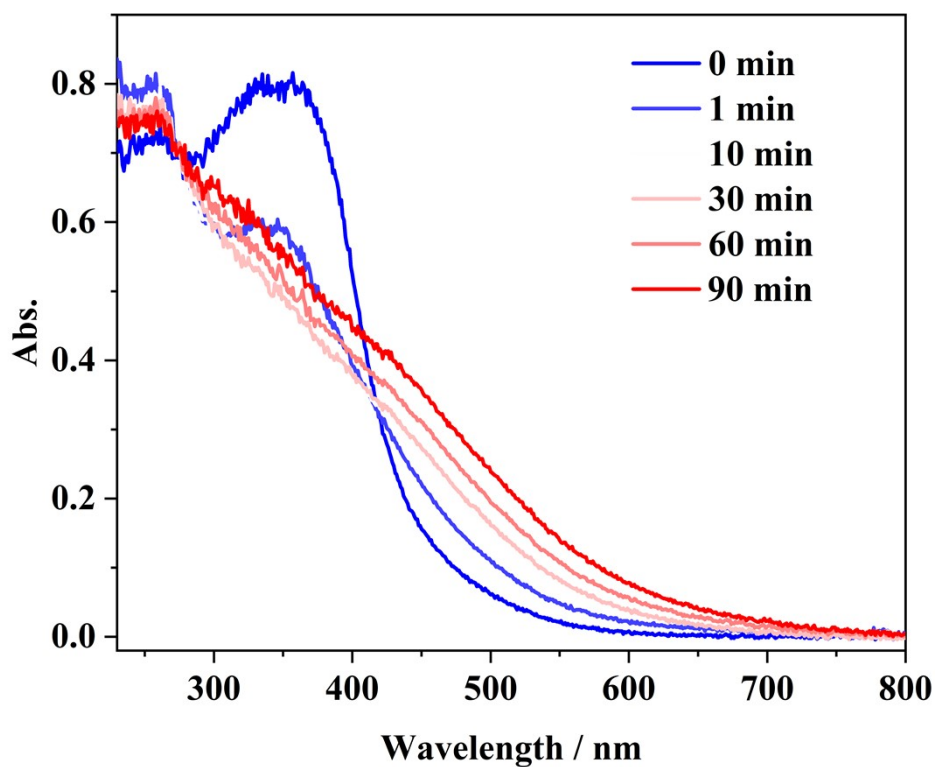

**Fig. S24** Solid-state UV-vis absorption spectra of 3-Gd at different irradiation time.

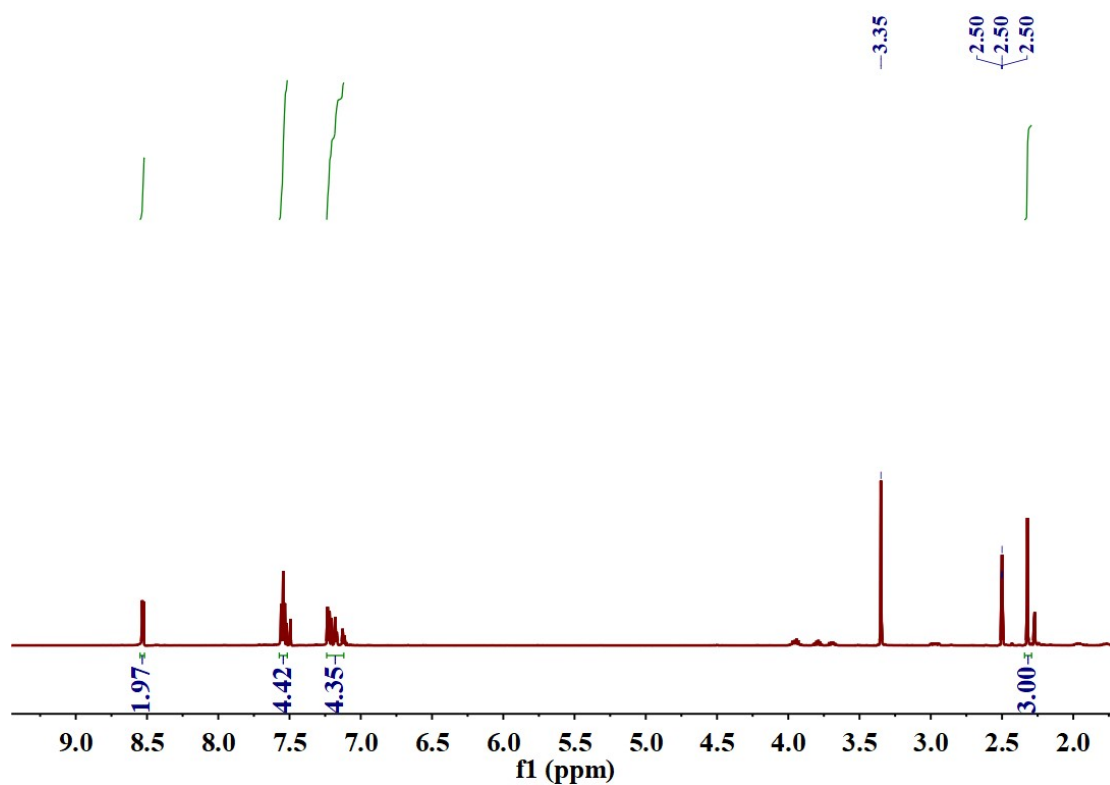

**Fig. S25** <sup>1</sup>H NMR (400 MHz, DMSO-*d*<sub>6</sub>, room temperature) spectra before and after irradiation of Me-4-arylethene.

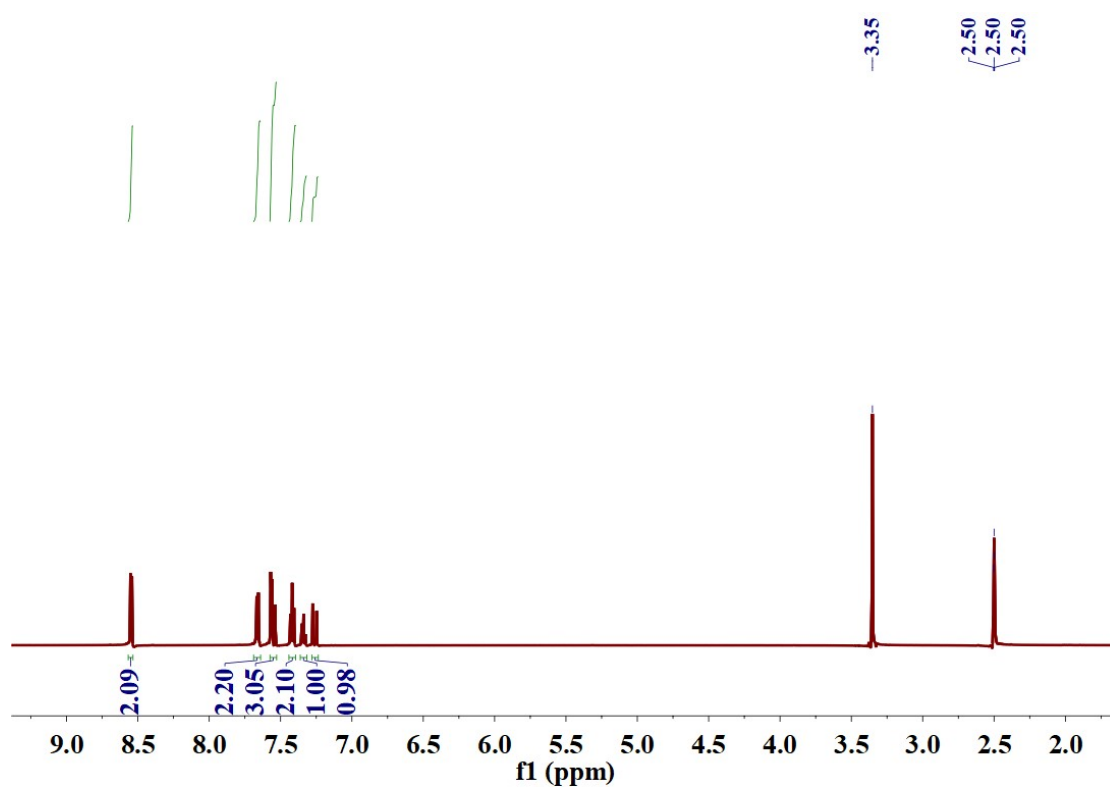

**Fig. S26** <sup>1</sup>H NMR (400 MHz, DMSO-*d*<sub>6</sub>, room temperature) spectra before and after irradiation of H-4-arylethene.

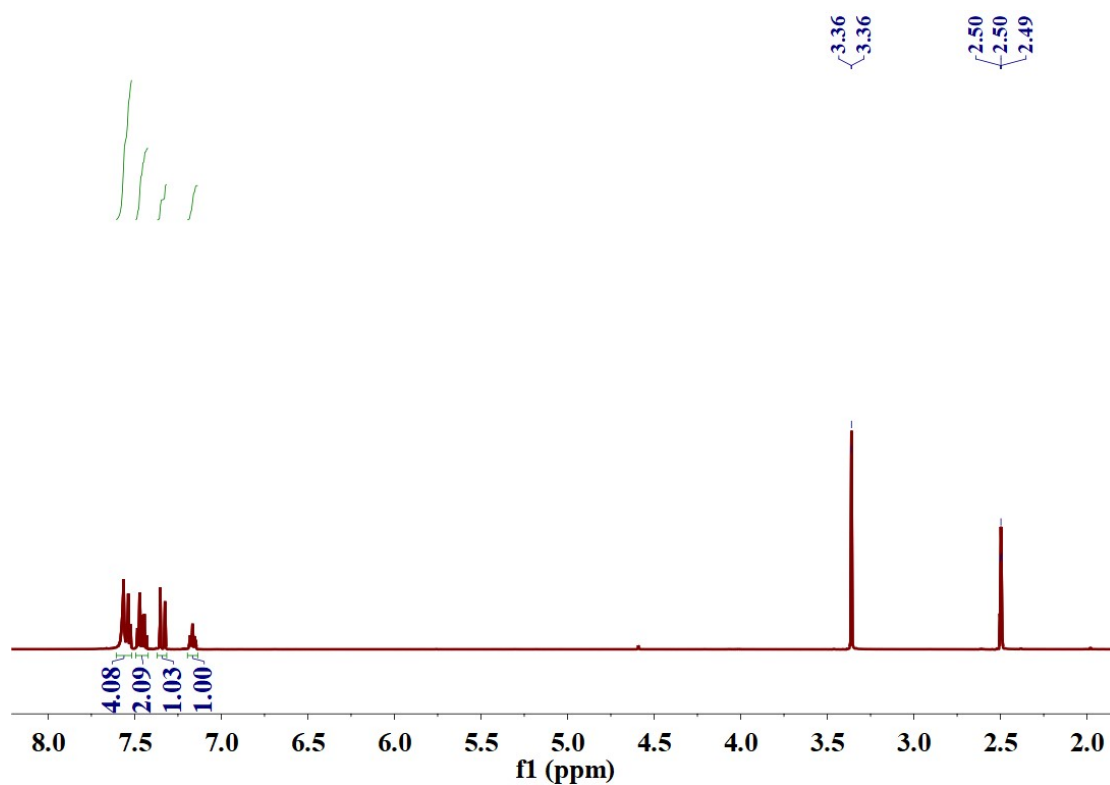

**Fig. S27**  $^1\text{H}$  NMR (400 MHz,  $\text{DMSO-}d_6$ , room temperature) spectra before and after irradiation of Cl-4-arylethene.

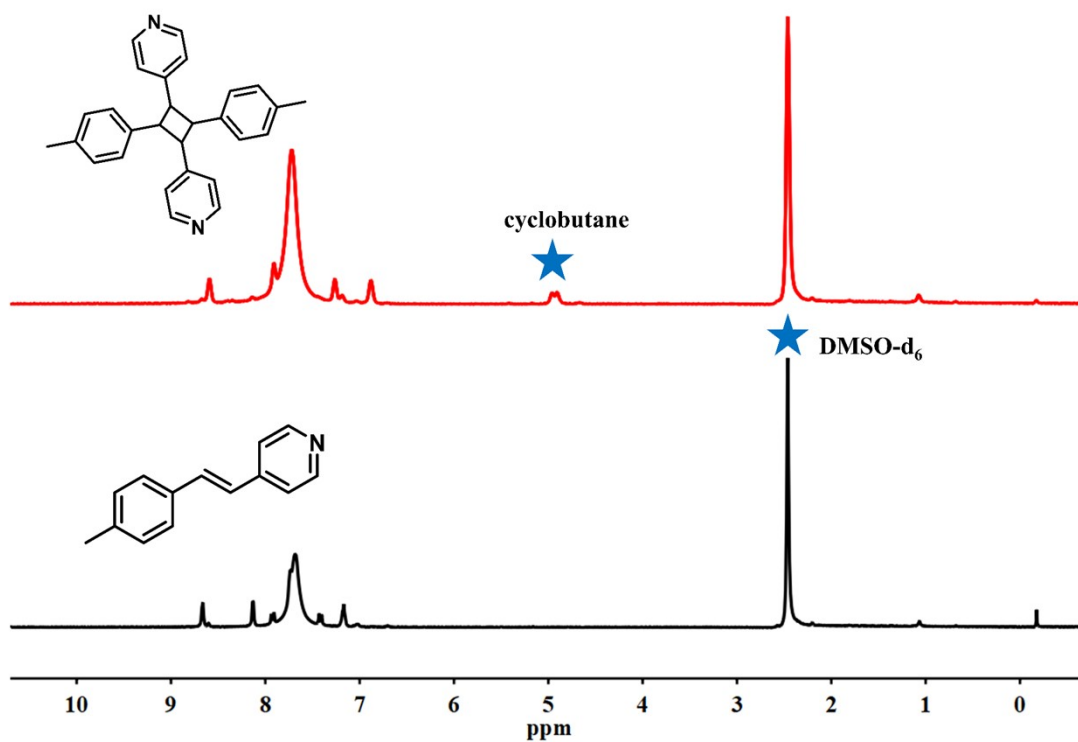

**Fig. S28**  $^1\text{H}$  NMR (400 MHz,  $\text{DMSO-}d_6$ , room temperature) spectra before and after irradiation of **1-Dy**.

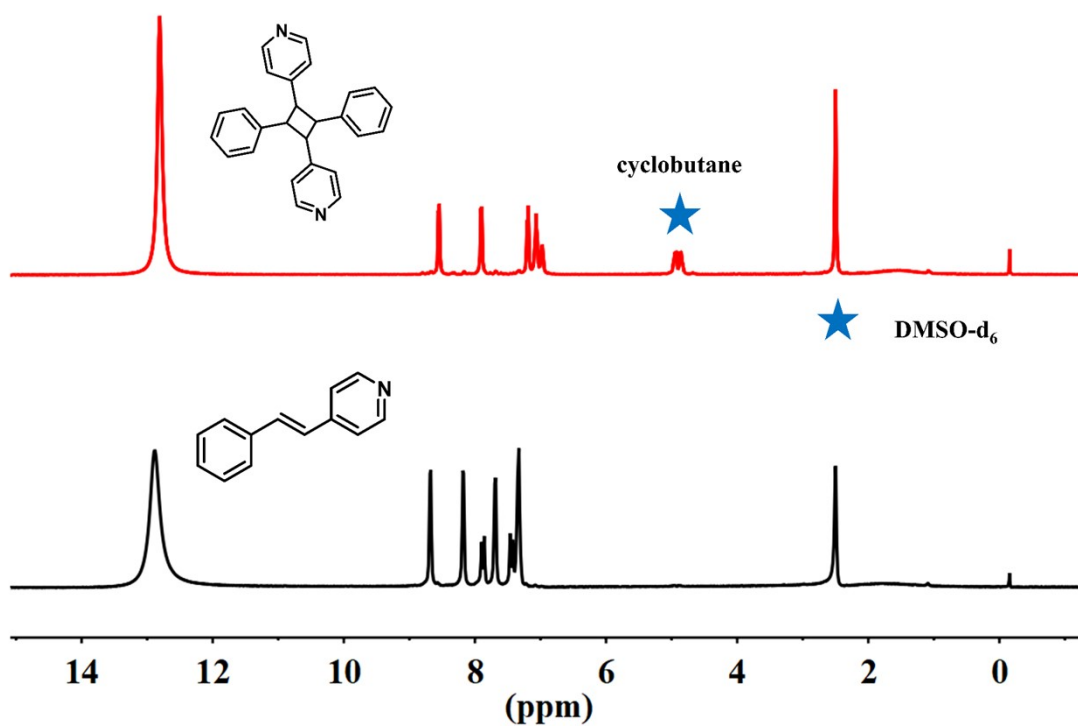

**Fig. S29** <sup>1</sup>H NMR (400 MHz, DMSO-*d*<sub>6</sub>, room temperature) spectra before and after irradiation of **2-Dy**.

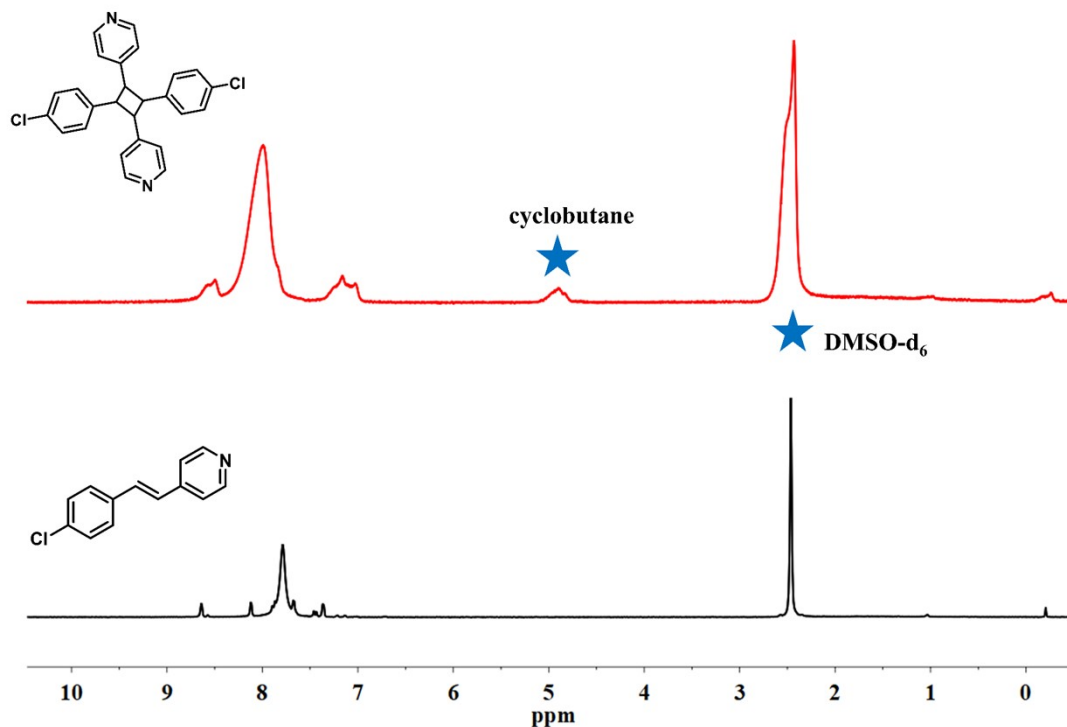

**Fig. S30** <sup>1</sup>H NMR (400 MHz, DMSO-*d*<sub>6</sub>, room temperature) spectra before and after irradiation of **3-Dy**.

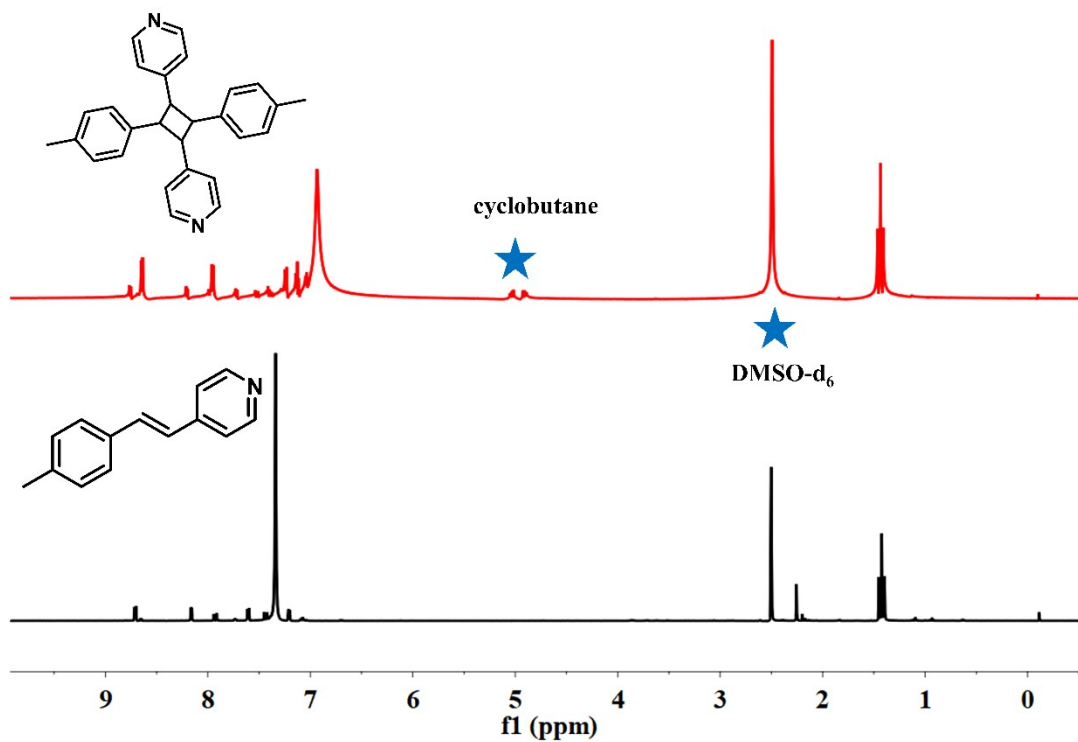

**Fig. S31**  $^1\text{H}$  NMR (400 MHz,  $\text{DMSO}-d_6$ , room temperature) spectra before and after irradiation of **1-Y**.

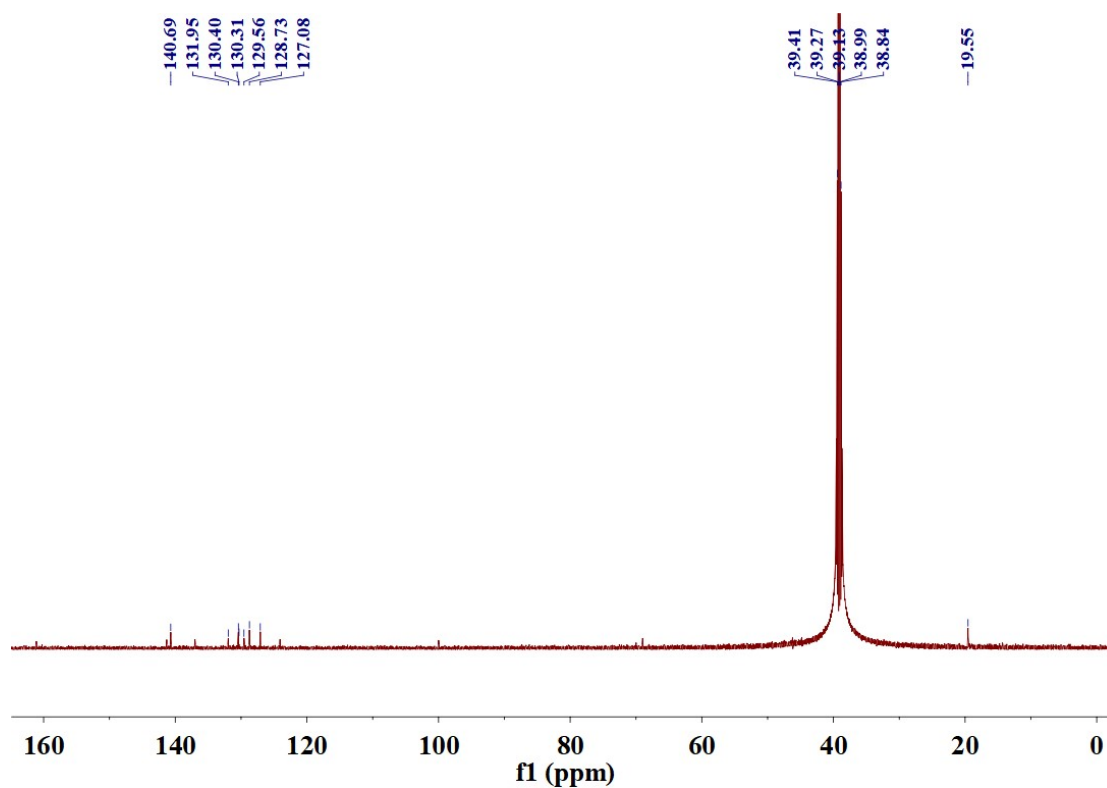

**Fig. S32**  $^{13}\text{C}$  NMR (400 MHz,  $\text{DMSO}-d_6$ , room temperature) spectra before and after irradiation of **1-Y**.

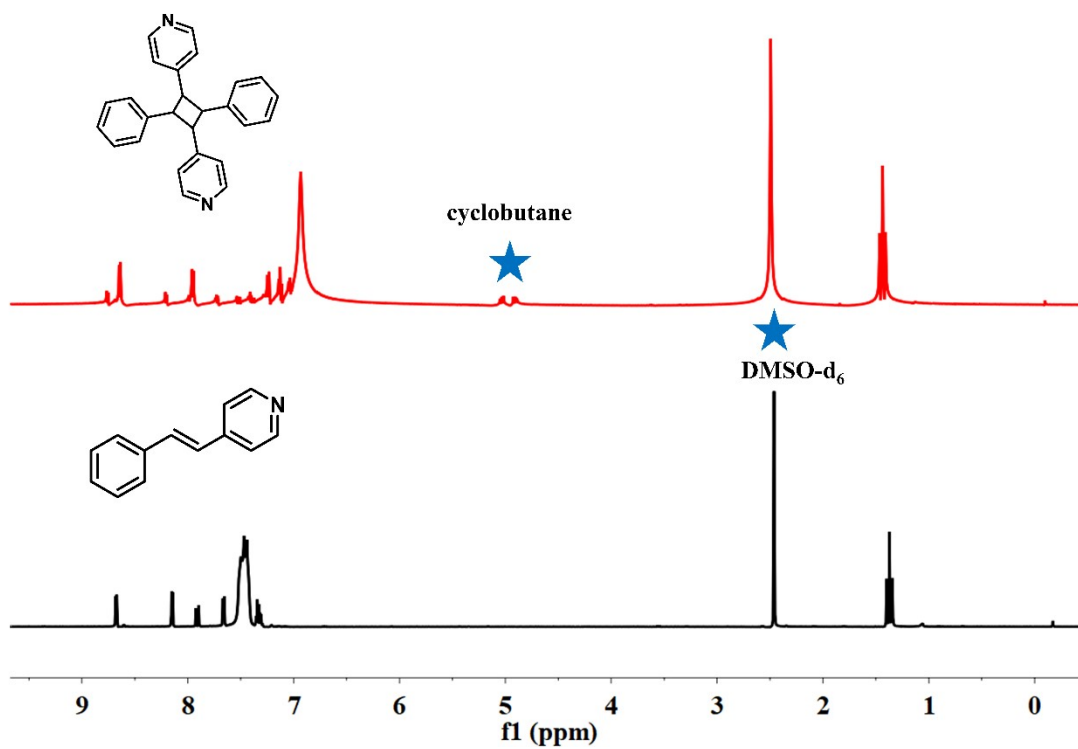

**Fig. S33**  $^1\text{H}$  NMR (400 MHz,  $\text{DMSO-}d_6$ , room temperature) spectra before and after irradiation of **2-Y**.

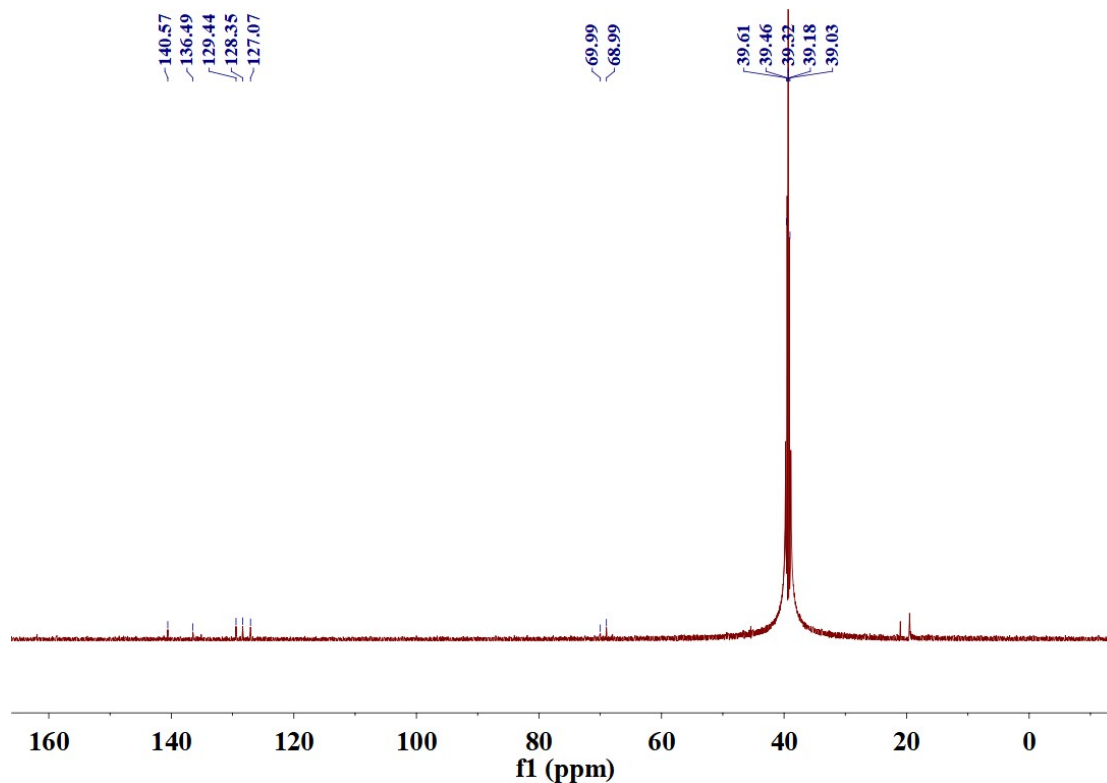

**Fig. S34**  $^{13}\text{C}$  NMR (400 MHz,  $\text{DMSO-}d_6$ , room temperature) spectra before and after irradiation of **2-Y**.

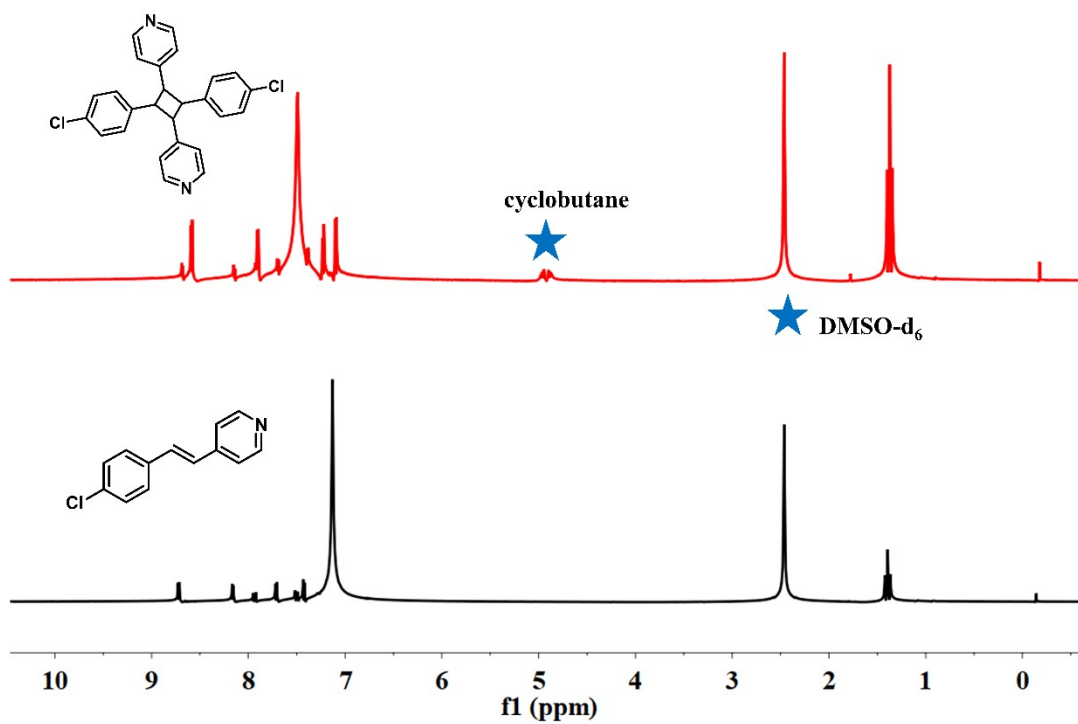

**Fig. S35**  $^1\text{H}$  NMR (400 MHz,  $\text{DMSO-}d_6$ , room temperature) spectra before and after irradiation of **3-Y**.

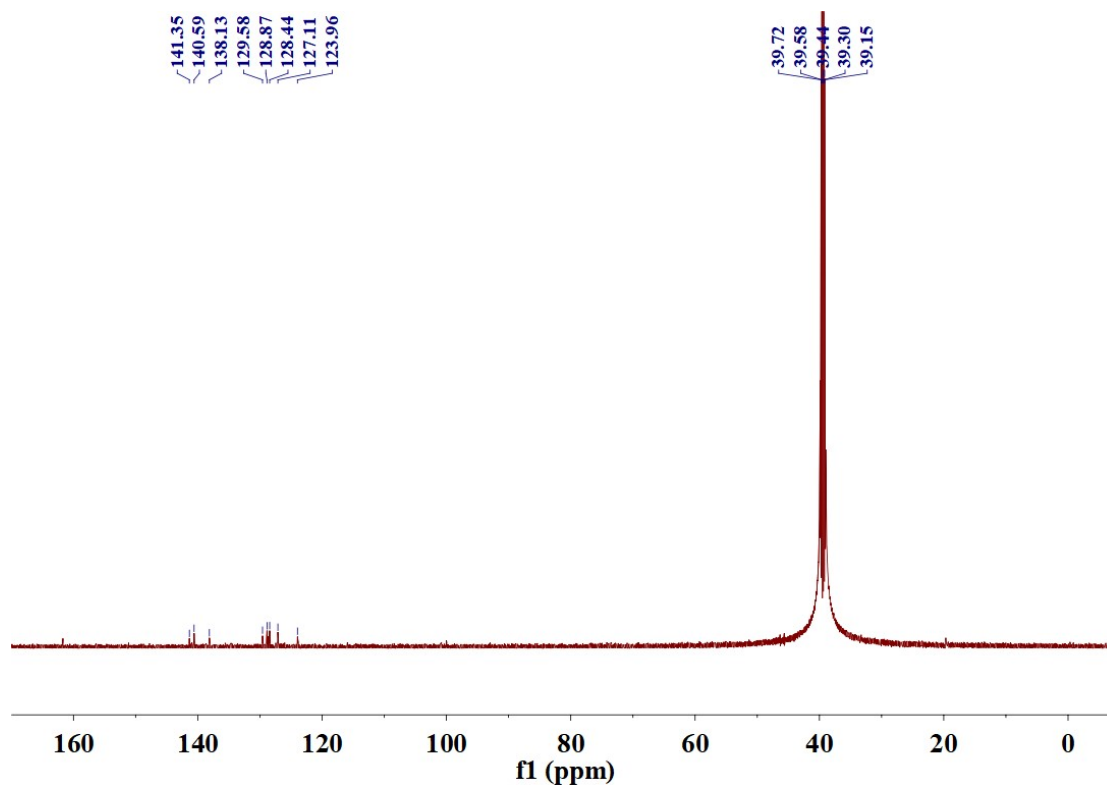

**Fig. S36**  $^{13}\text{C}$  NMR (400 MHz,  $\text{DMSO-}d_6$ , room temperature) spectra before and after irradiation of **3-Y**.

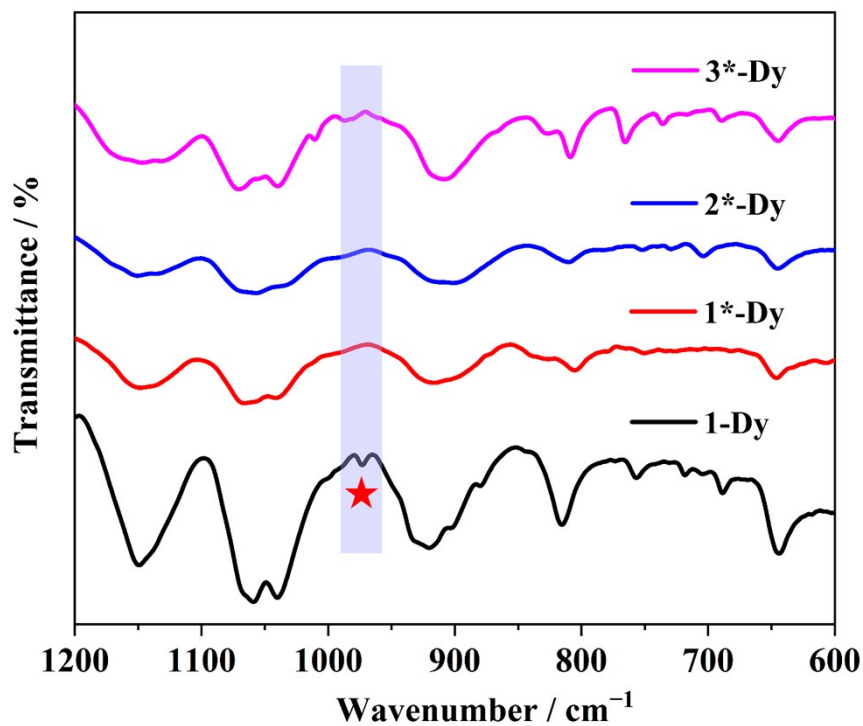

**Fig. S37** Room-temperature IR spectra of the irradiated samples with different substituents in the Dy series recorded using a diamond ATR probe.

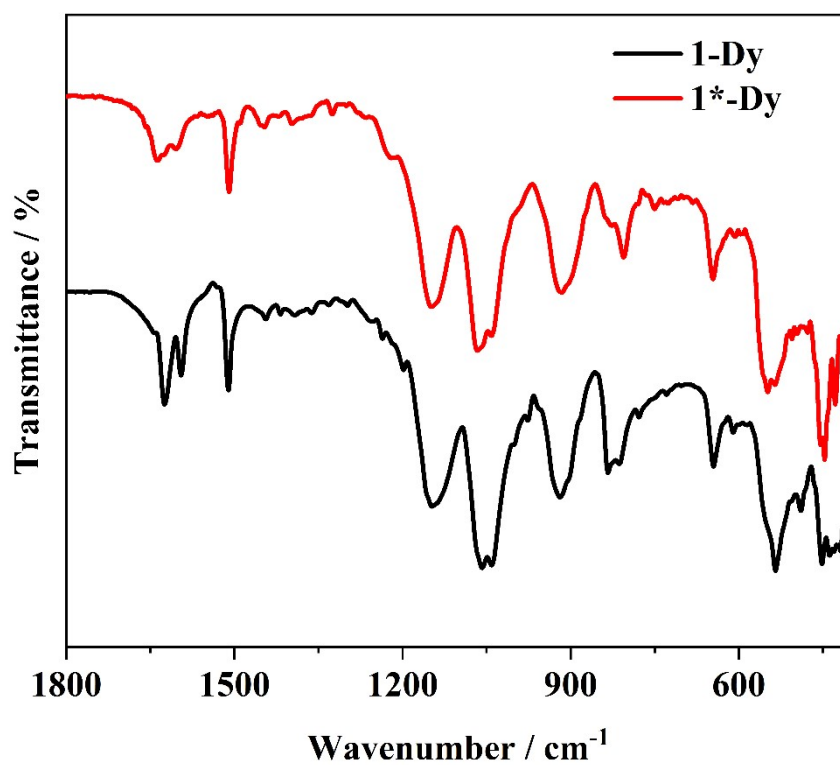

**Fig. S38** Room-temperature IR spectra of **1-Dy** and the corresponding irradiated sample **1\*-Dy** recorded using a diamond ATR probe.

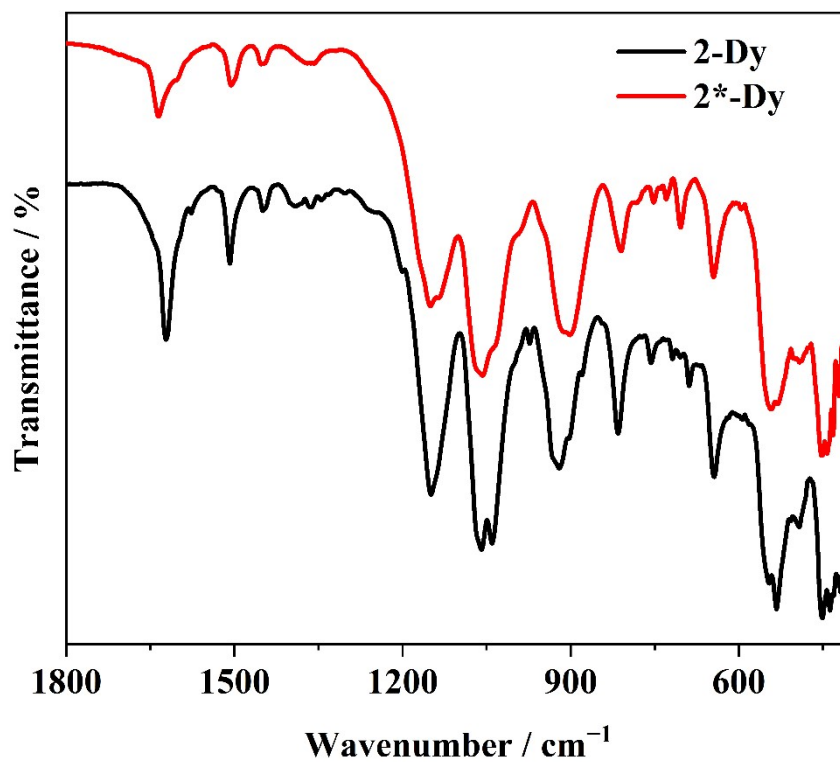

**Fig. S39** Room-temperature IR spectra of **2-Dy** and the corresponding irradiated sample **2\*-Dy** recorded using a diamond ATR probe.

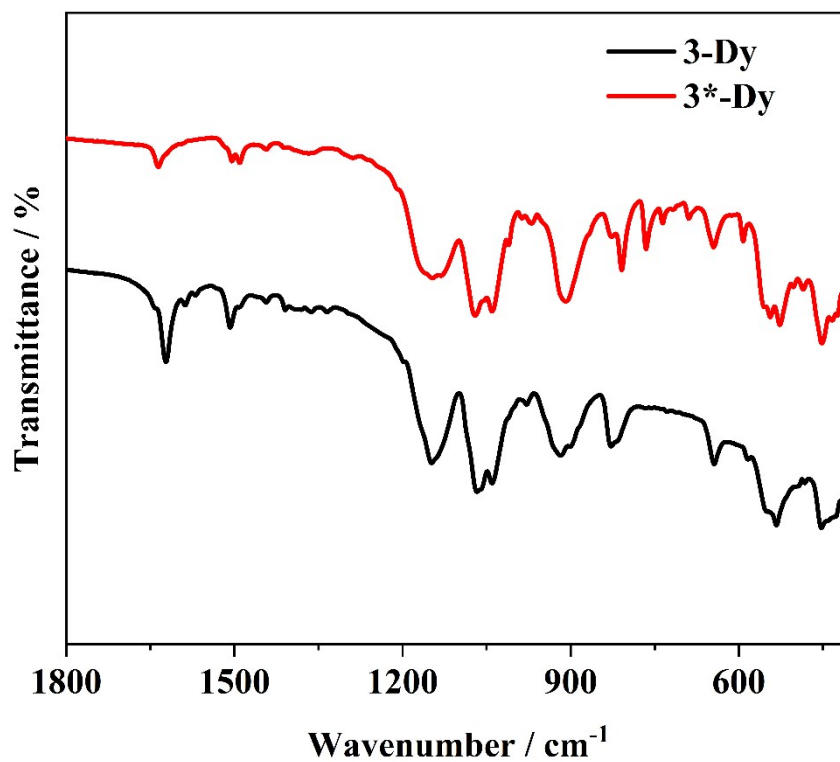

**Fig. S40** Room-temperature IR spectra of **3-Dy** and the corresponding irradiated sample **3\*-Dy** recorded using a diamond ATR probe.

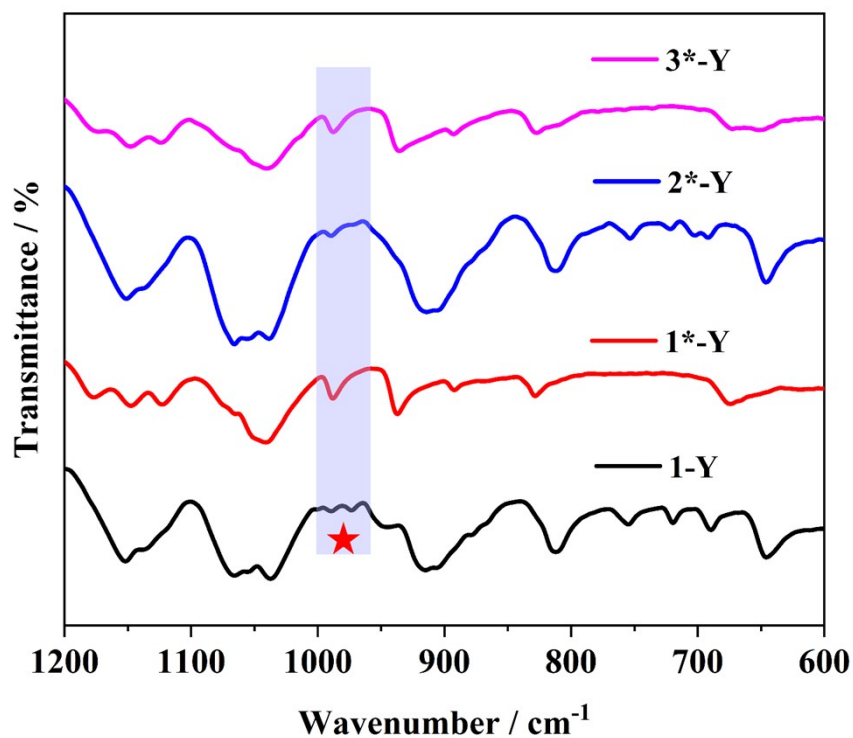

**Fig. S41** Room-temperature IR spectra of the irradiated samples with different substituents in the Y series recorded using a diamond ATR probe.

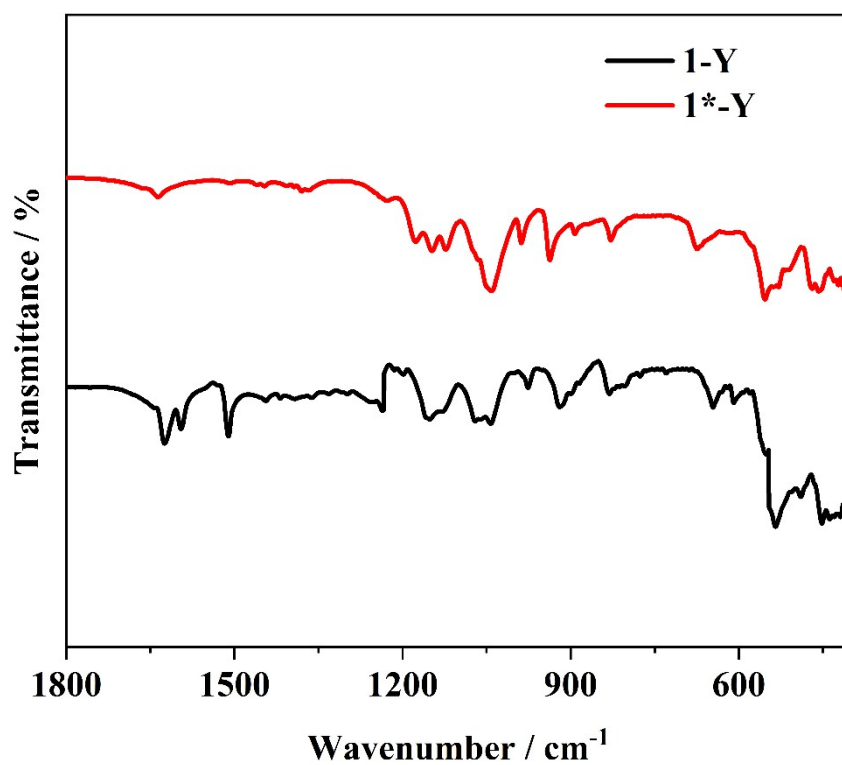

**Fig. S42** Room-temperature IR spectra of 1-Y and the corresponding irradiated sample 1\*-Y recorded using a diamond ATR probe.

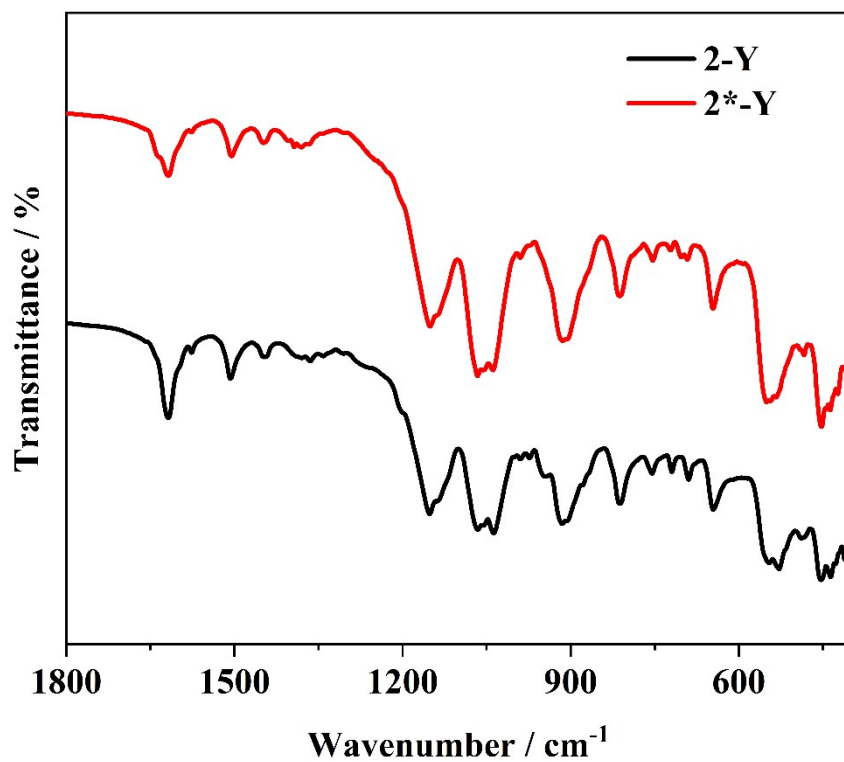

**Fig. S43** Room-temperature IR spectra of **2-Y** and the corresponding irradiated sample **2\*-Y** recorded using a diamond ATR probe.

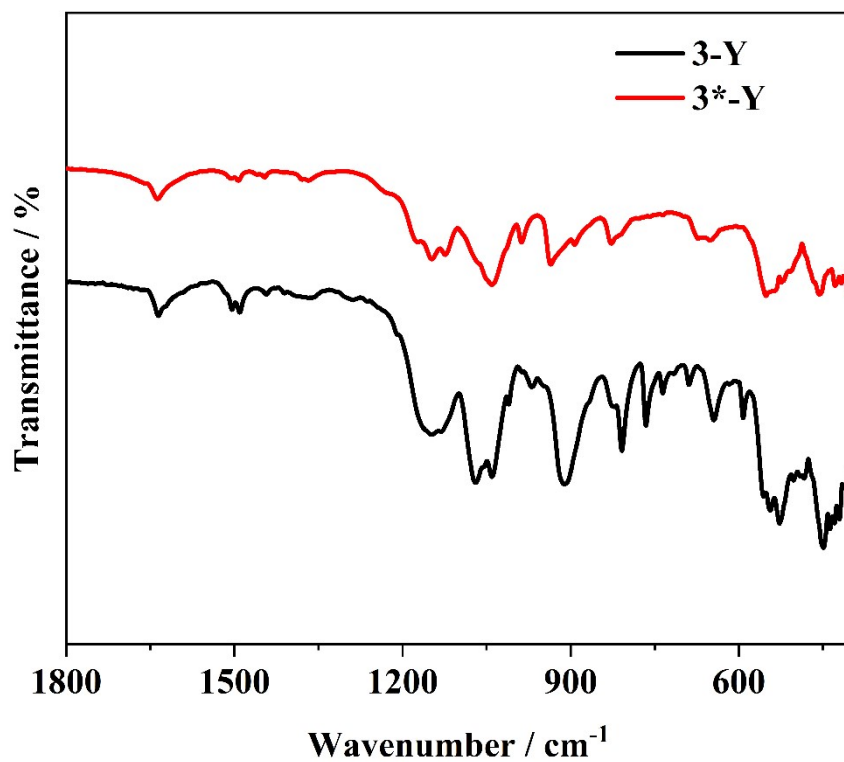

**Fig. S44** Room-temperature IR spectra of **3-Y** and the corresponding irradiated sample **3\*-Y** recorded using a diamond ATR probe.

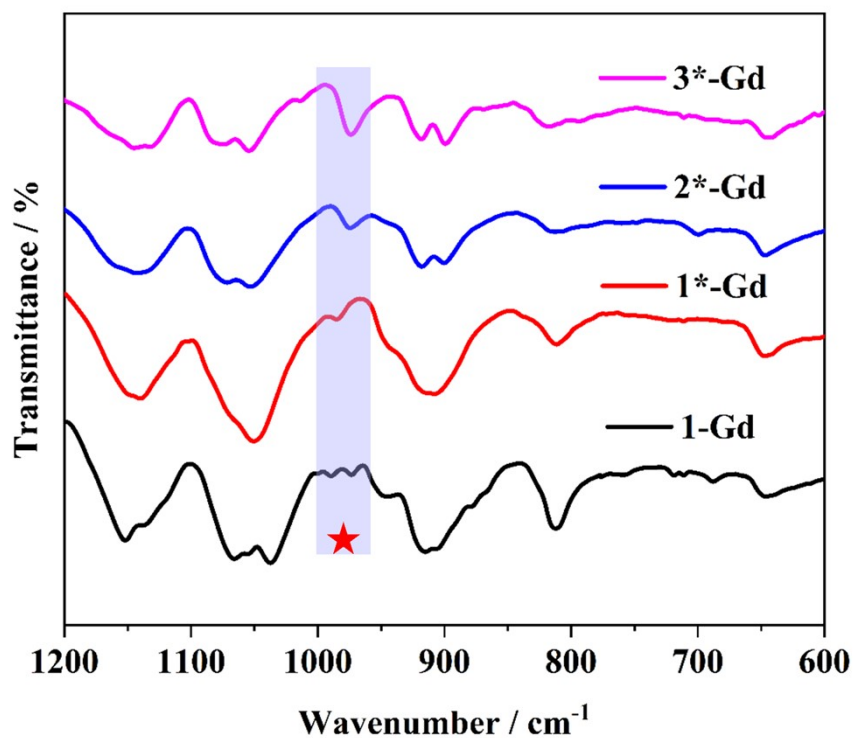

**Fig. S45** Room-temperature IR spectra of the irradiated samples with different substituents in the Gd series recorded using a diamond ATR probe.

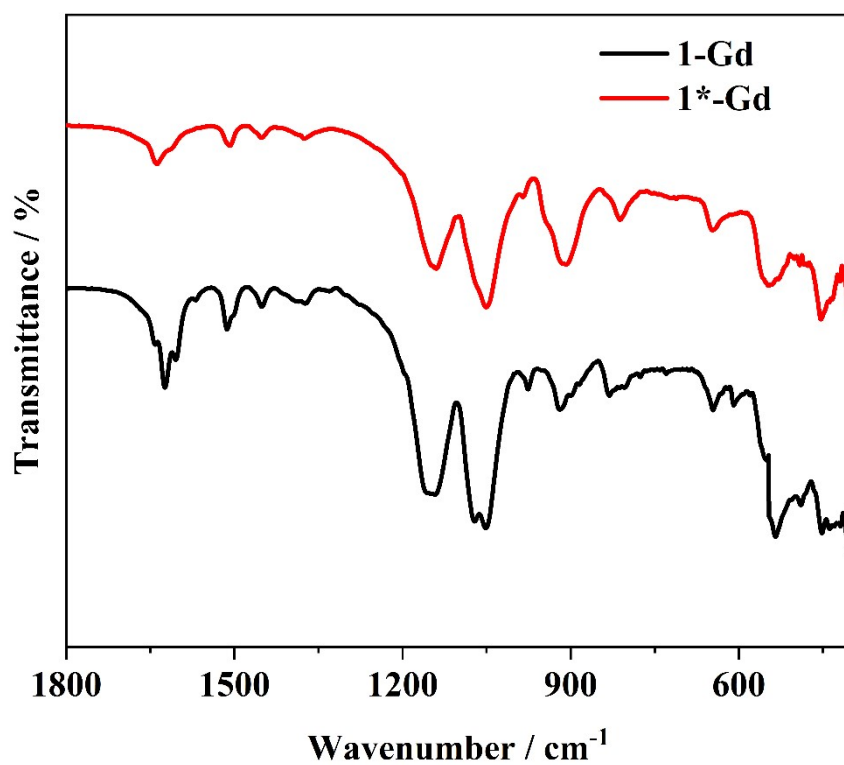

**Fig. S46** Room-temperature IR spectra of **1-Gd** and the corresponding irradiated sample **1\*-Gd** recorded using a diamond ATR probe.

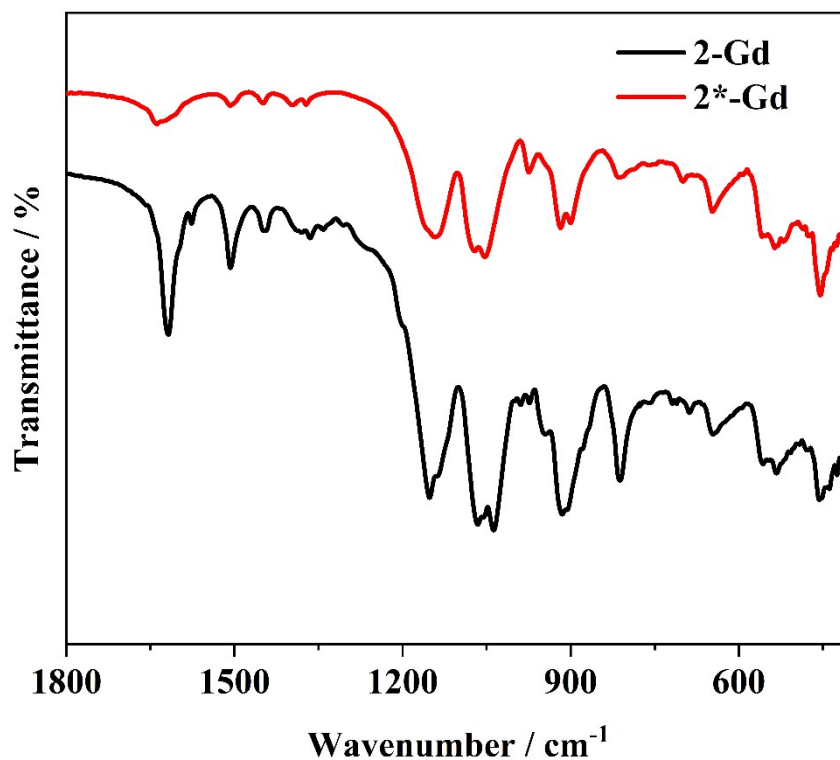

**Fig. S47** Room-temperature IR spectra of **2-Gd** and the corresponding irradiated sample **2\*-Gd** recorded using a diamond ATR probe.

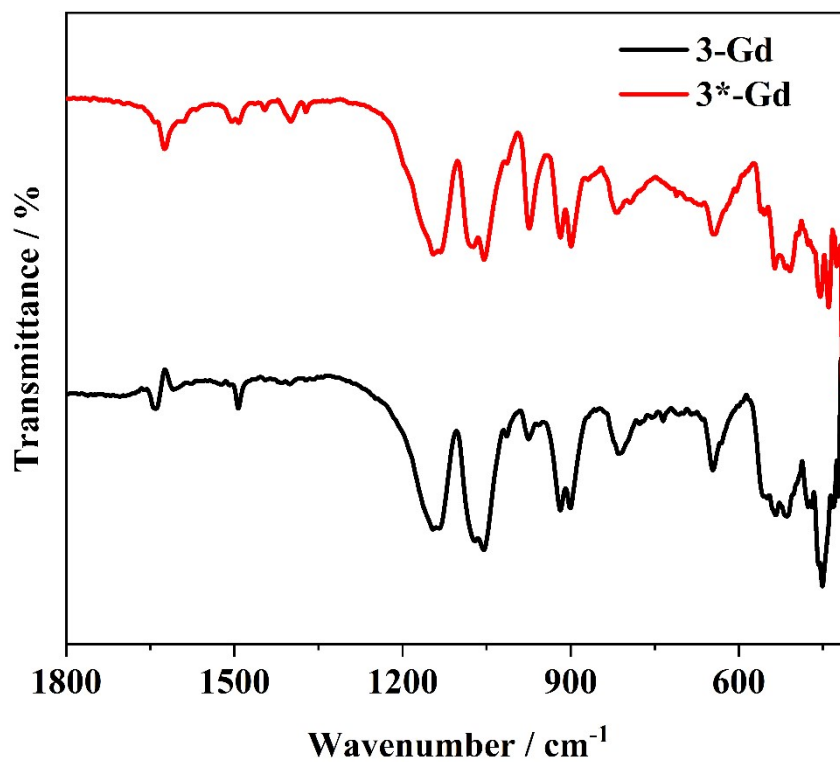

**Fig. S48** Room-temperature IR spectra of **3-Gd** and the corresponding irradiated sample **3\*-Gd** recorded using a diamond ATR probe.

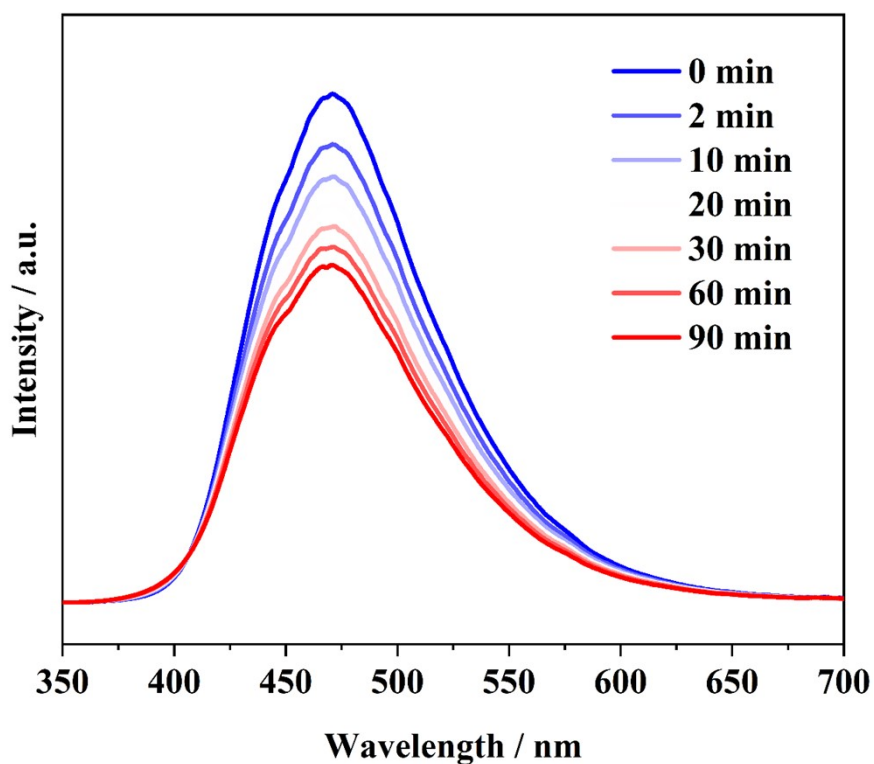

**Figure S49** Time-dependent fluorescence intensity spectra of compound **1-Dy**

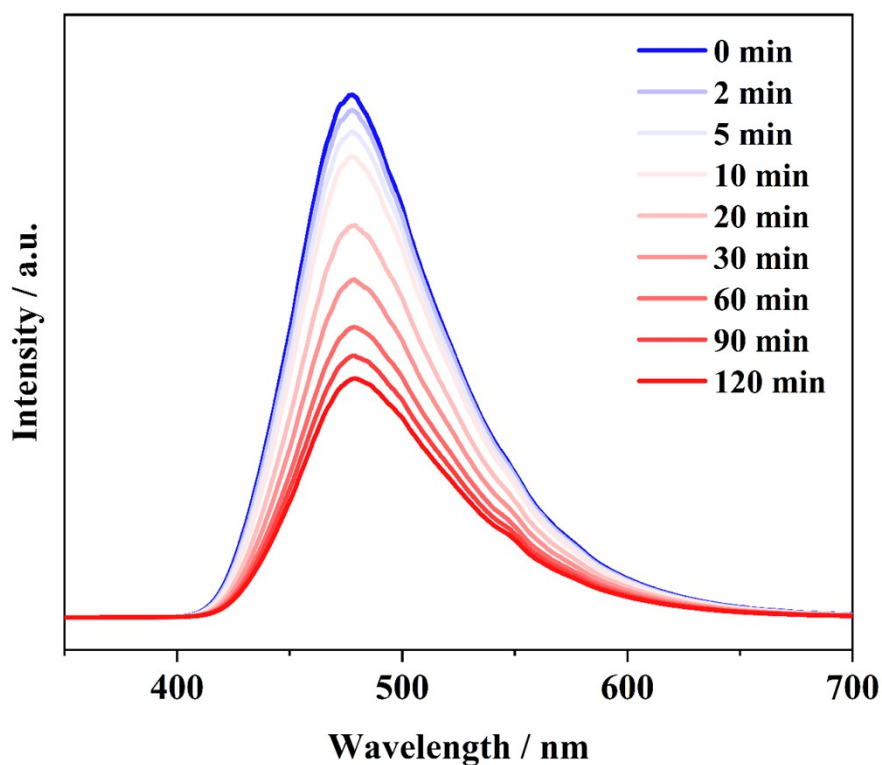

**Figure S50** Time-dependent fluorescence intensity spectra of compound **2-Dy**.

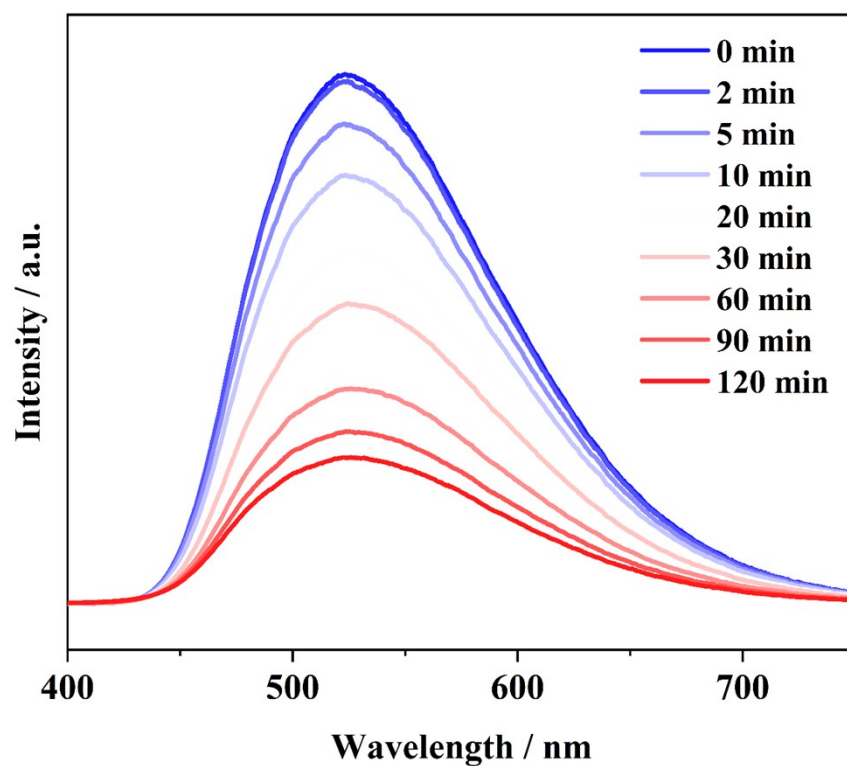

Figure S51 Time-dependent fluorescence intensity spectra of compound 3-Dy.

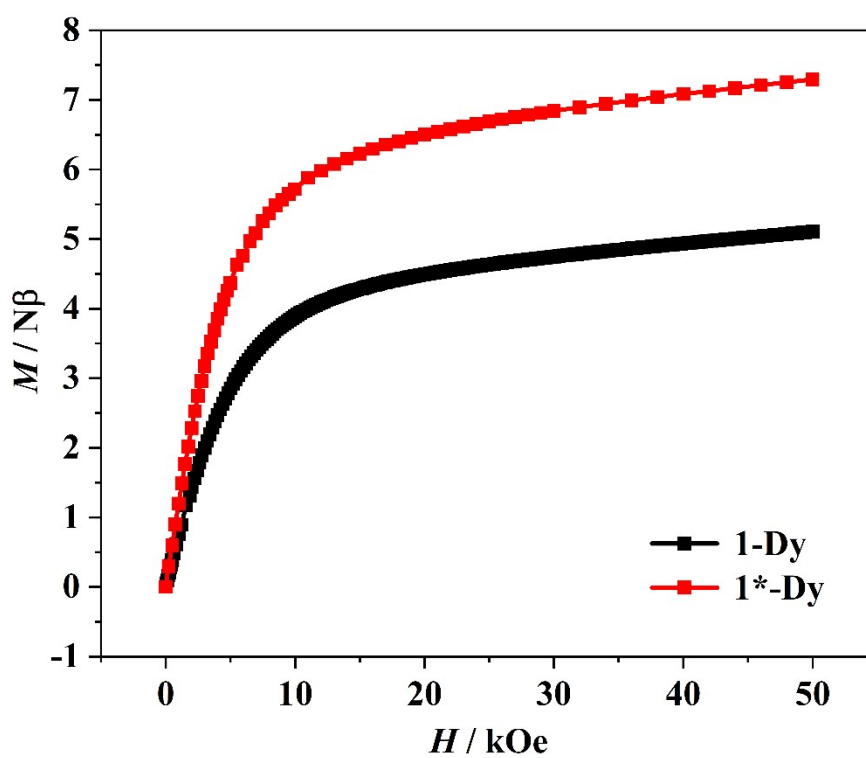

Fig. S52 Isothermal magnetization curves before and after irradiation at 2 K for 1-Dy.

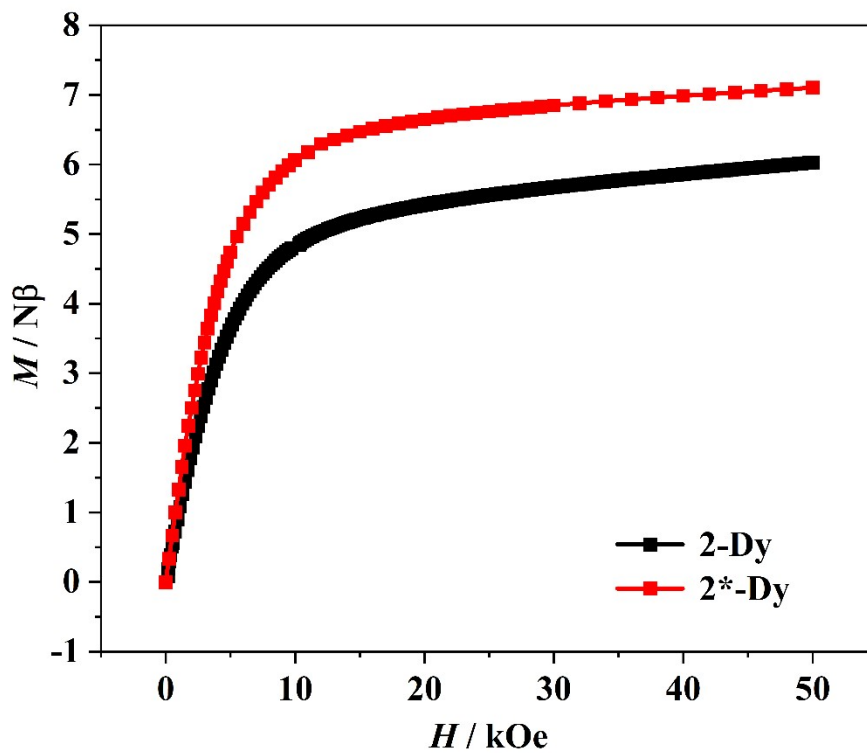

Fig. S53 Isothermal magnetization curves before and after irradiation at 2 K for 2-Dy.

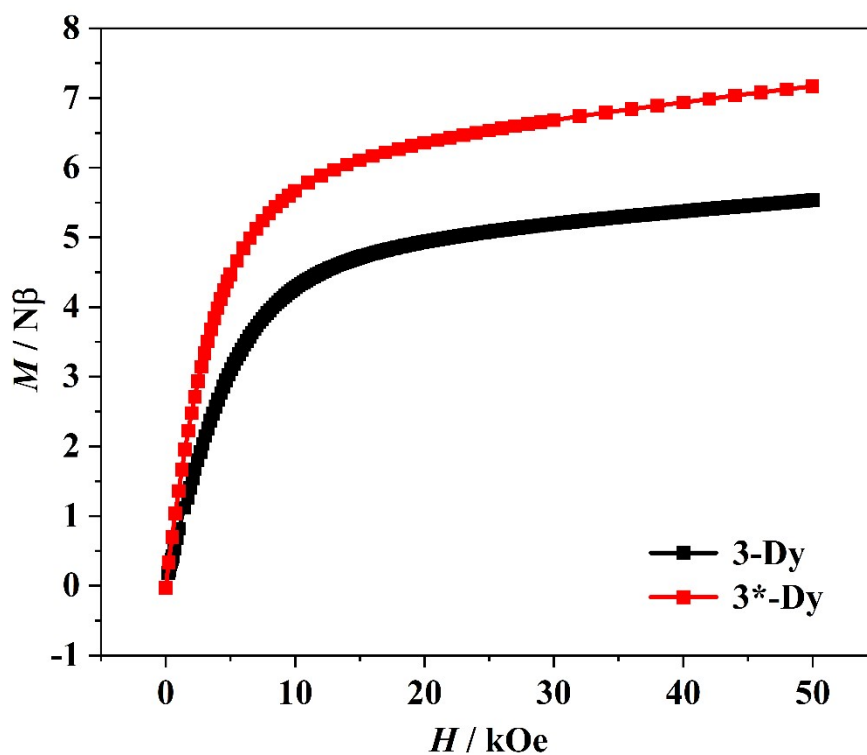

Fig. S54 Isothermal magnetization curves before and after irradiation at 2 K for 3-Dy.

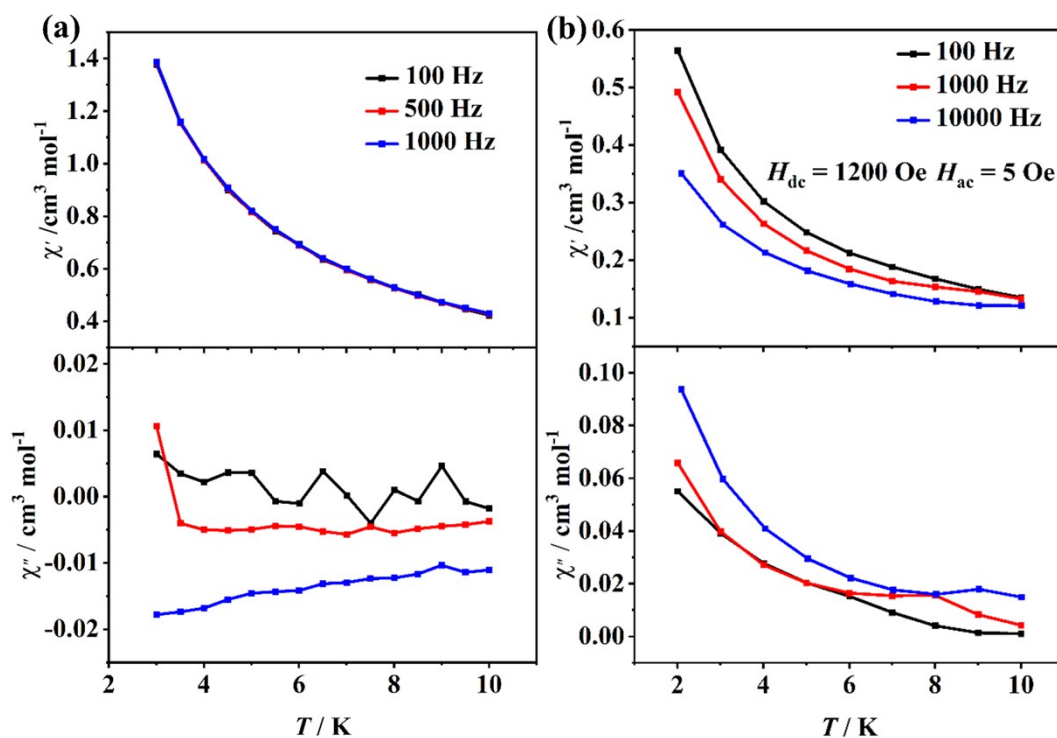

**Fig. S55** Temperature dependence of the  $\chi'$  and  $\chi''$  components of the ac magnetic susceptibility for **1-Dy** measured at various ac frequencies under zero dc field (a) and under the optimal dc field (b).

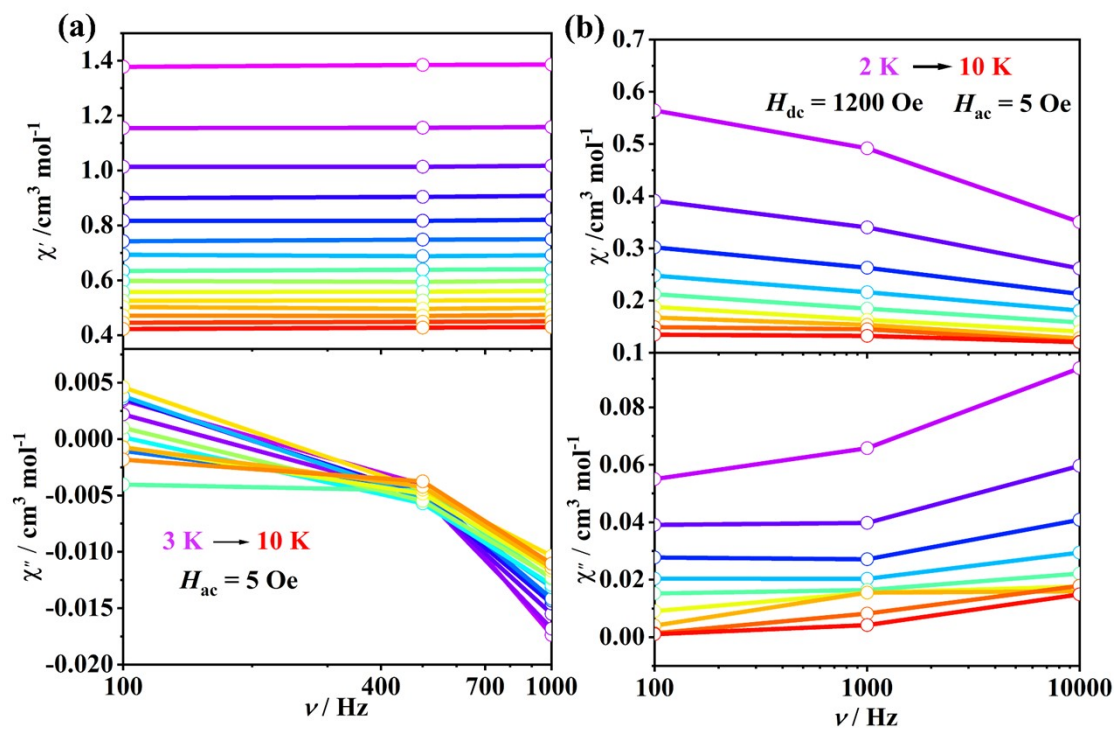

**Fig. S56** The frequency dependent  $\chi'$  and  $\chi''$  signals of **1-Dy** measured under 0 Oe dc and 5 Oe ac fields (a) and under 1200 Oe dc and 5 Oe ac fields (b).

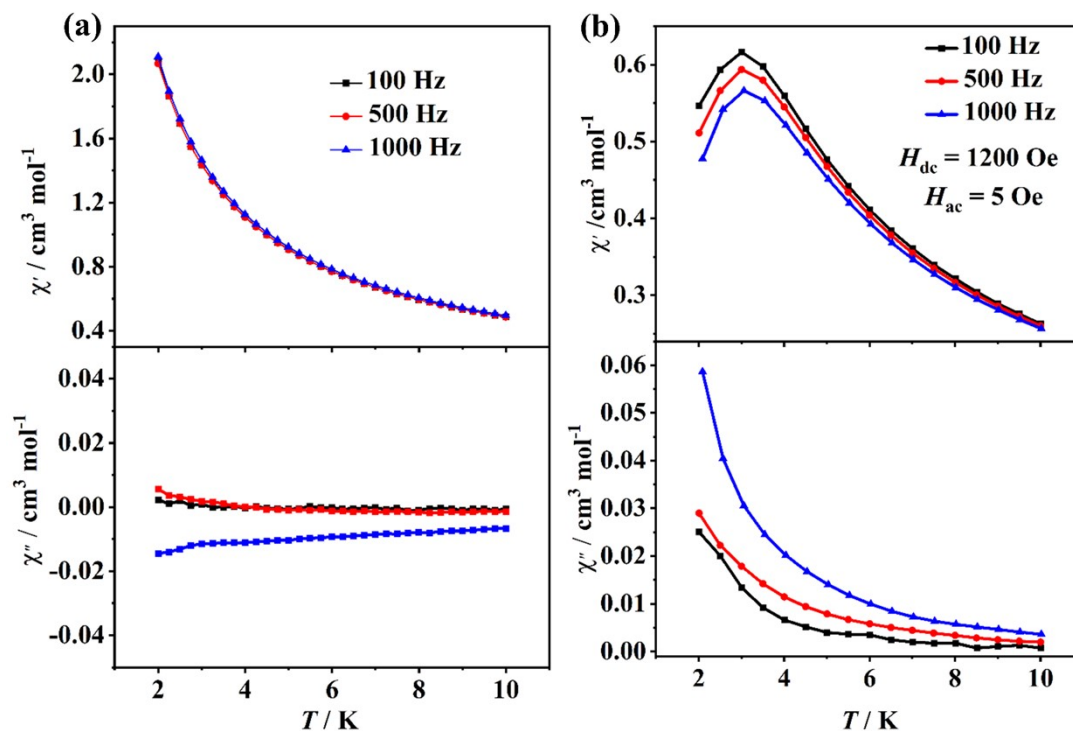

**Fig. S57** Temperature dependence of the  $\chi'$  and  $\chi''$  components of the ac magnetic susceptibility for **2-Dy** measured at various ac frequencies under zero dc field (a) and under the optimal dc field (b).

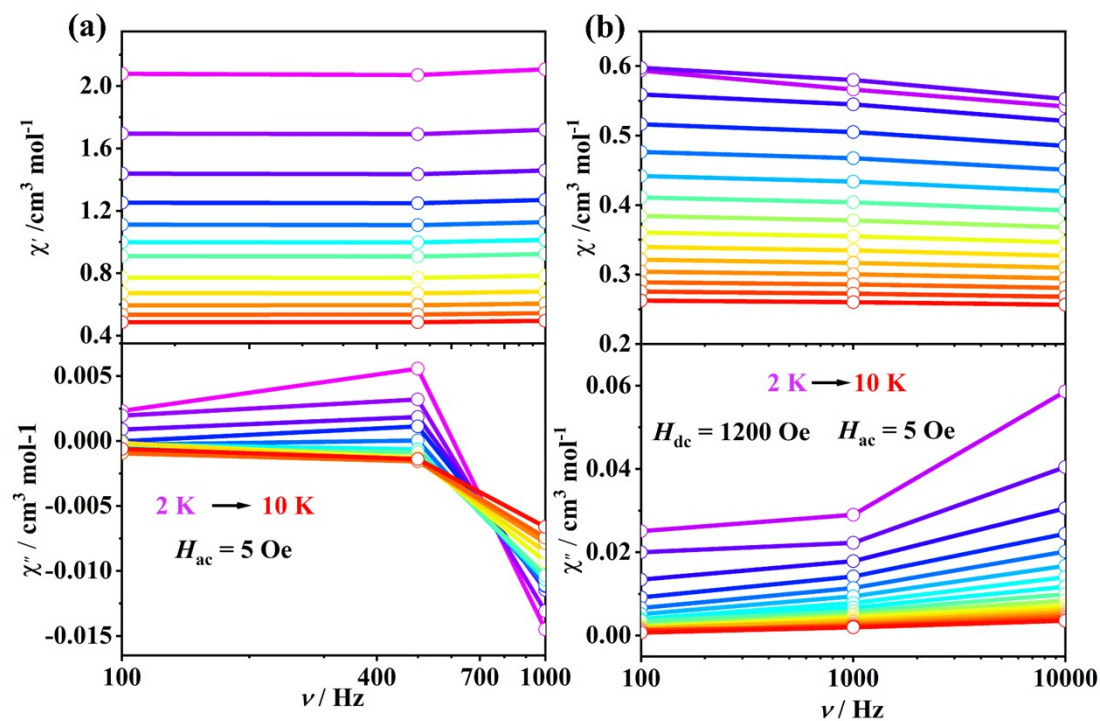

**Fig. S58** The frequency dependent  $\chi'$  and  $\chi''$  signals of **2-Dy** measured under 0 Oe dc and 5 Oe ac fields (a) and under 1200 Oe dc and 5 Oe ac fields (b)

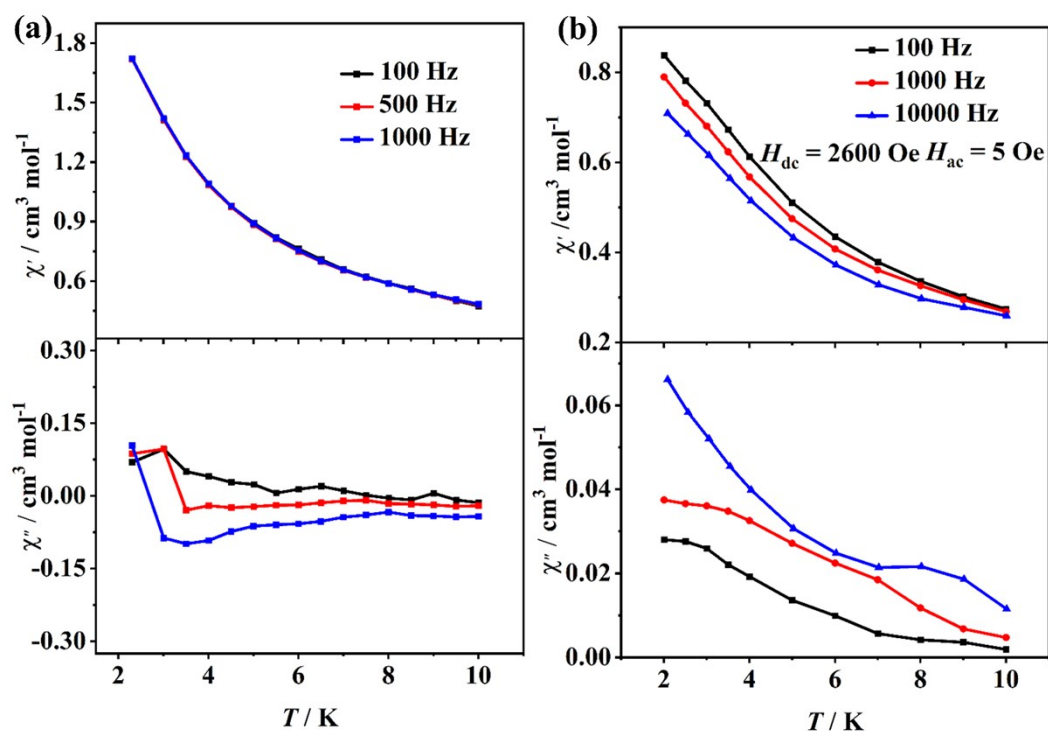

**Fig. S59** Temperature dependence of the  $\chi'$  and  $\chi''$  components of the ac magnetic susceptibility for **3-Dy** measured at various ac frequencies under zero dc field (a) and under the optimal dc field (b).

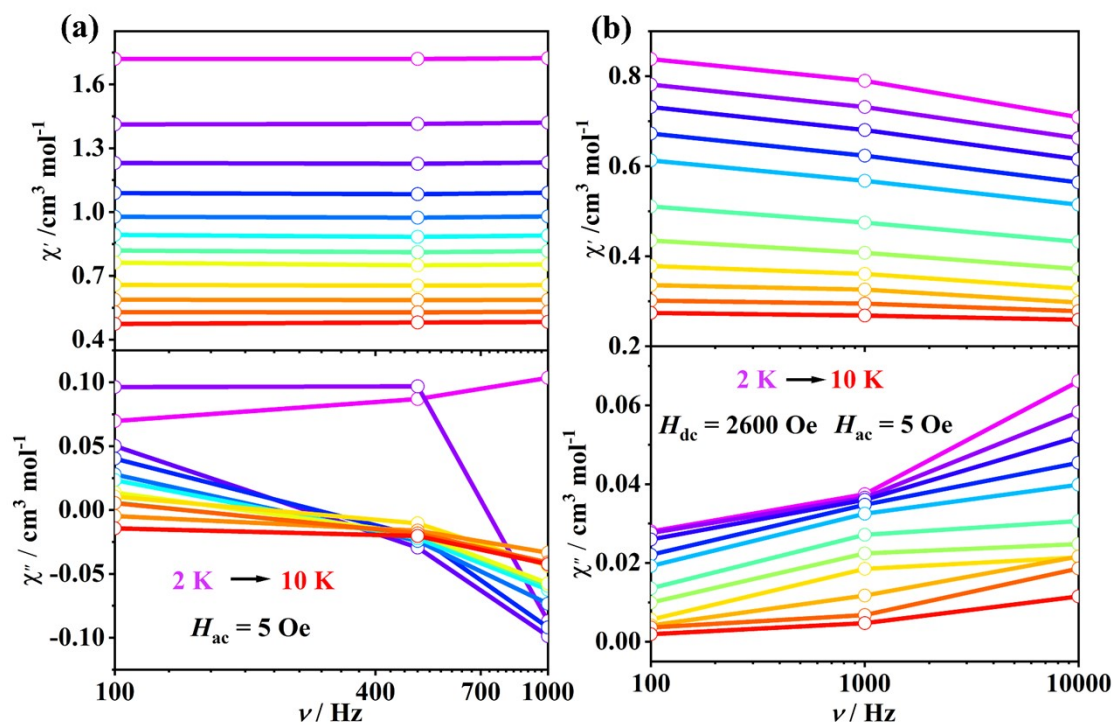

**Fig. S60** The frequency dependent  $\chi'$  and  $\chi''$  signals of **3-Dy** measured under 0 Oe dc and 5 Oe ac fields (a) and under 1200 Oe dc and 5 Oe ac fields (b).

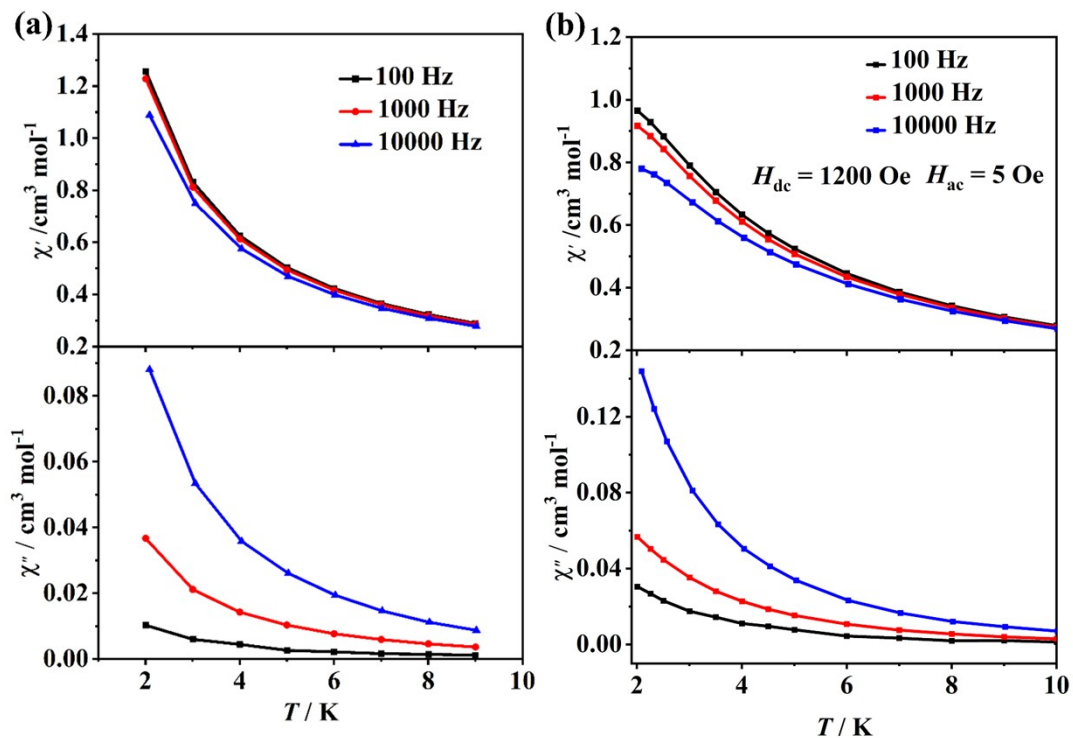

**Fig. S61** Temperature dependence of the  $\chi'$  and  $\chi''$  components of the ac magnetic susceptibility for **1\*-Dy** measured at various ac frequencies under zero dc field (a) and under the optimal dc field (b).

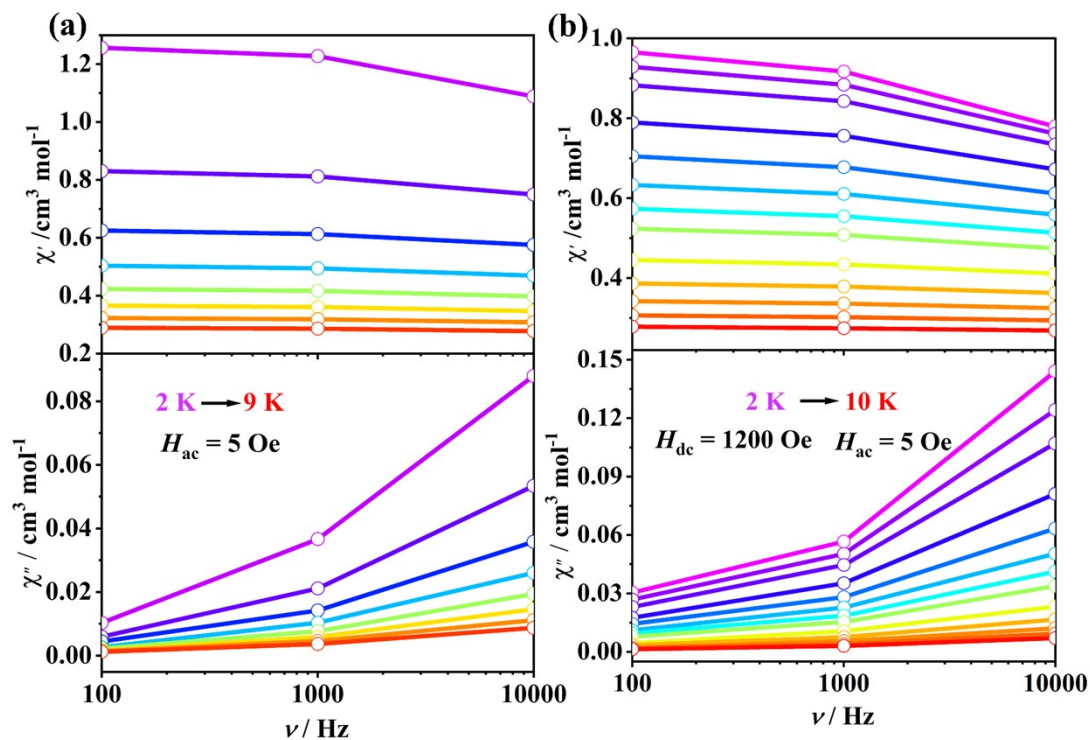

**Fig. S62** The frequency dependent  $\chi'$  and  $\chi''$  signals of **1\*-Dy** measured under 0 Oe dc and 5 Oe ac fields (a) and under 1200 Oe dc and 5 Oe ac fields (b).

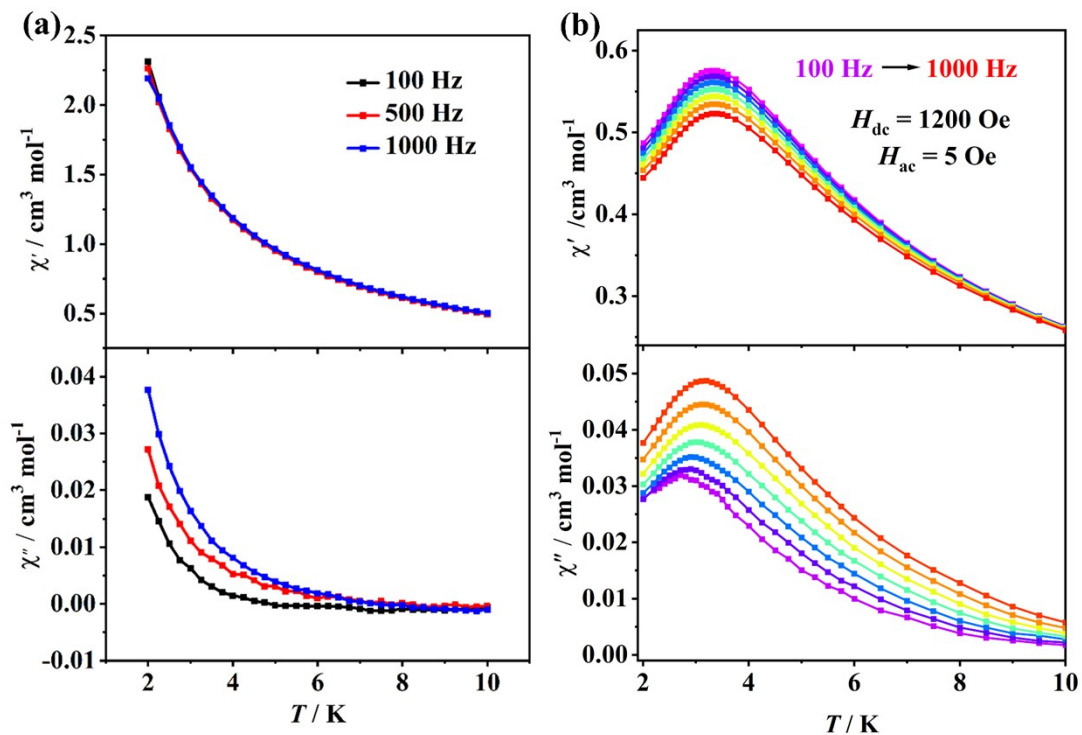

**Fig. S63** Temperature dependence of the  $\chi'$  and  $\chi''$  components of the ac magnetic susceptibility for  $2^*$ -Dy measured at various ac frequencies under zero dc field (a) and under the optimal dc field (b).

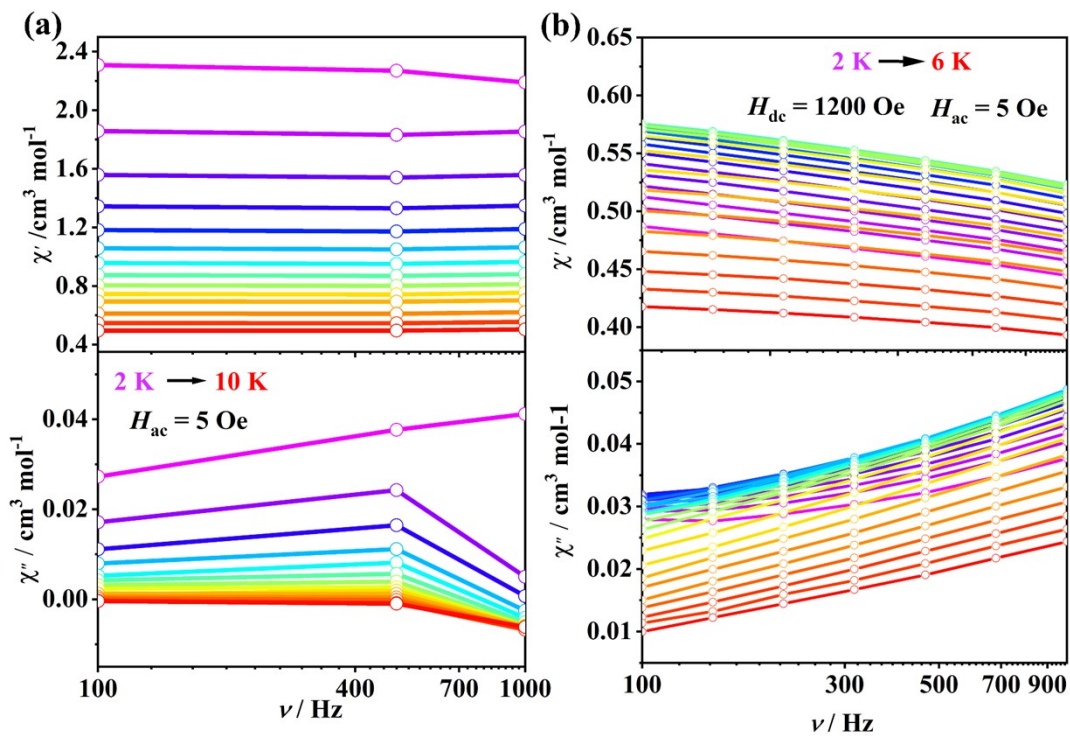

**Fig. S64** The frequency dependent  $\chi'$  and  $\chi''$  signals of  $2^*$ -Dy measured under 0 Oe dc and 5 Oe ac fields (a) and under 1200 Oe dc and 5 Oe ac fields (b).

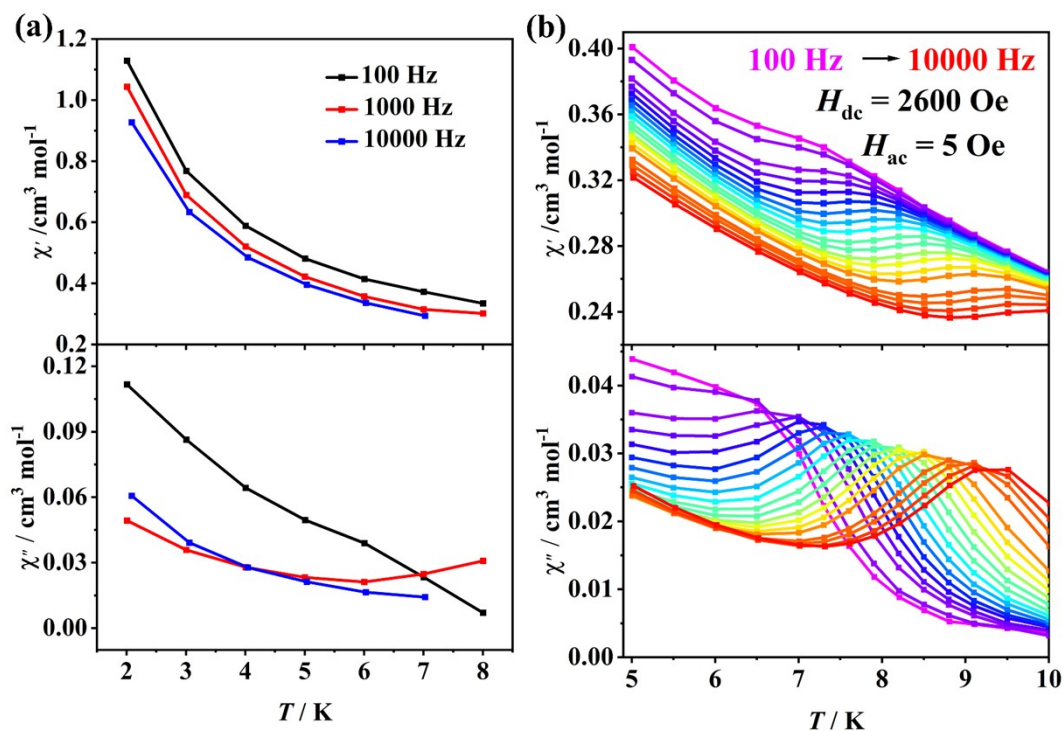

**Fig. S65** Temperature dependence of the  $\chi'$  and  $\chi''$  components of the ac magnetic susceptibility for  $3^*\text{-Dy}$  measured at various ac frequencies under zero dc field (a) and under the optimal dc field (b).

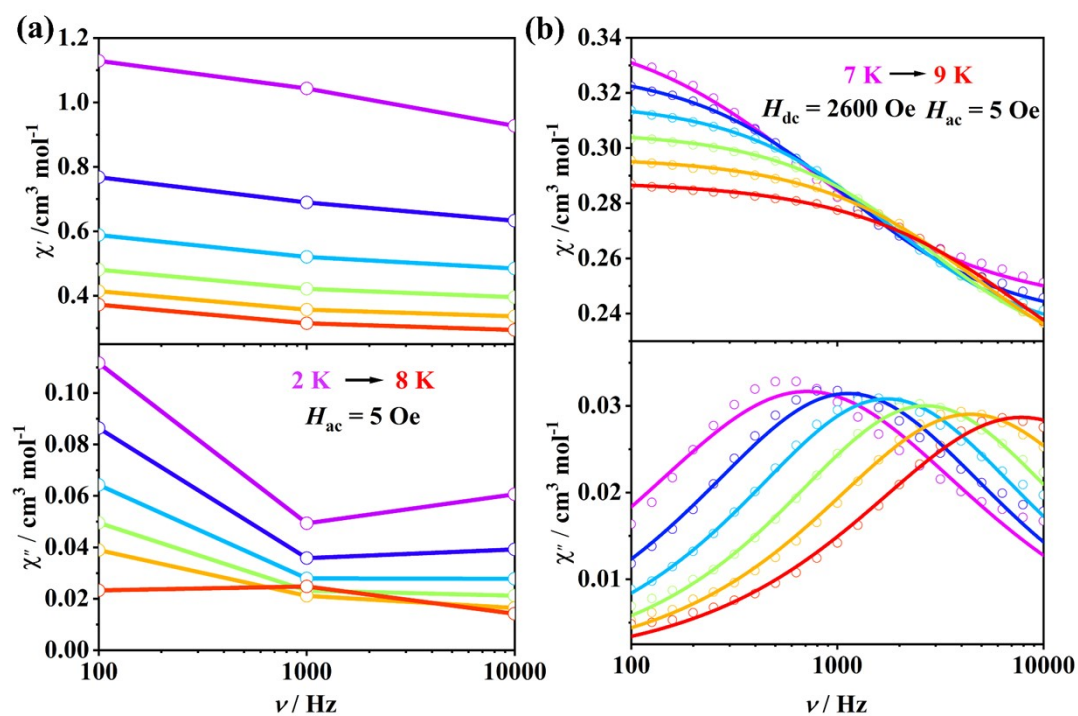

**Fig. S66** The frequency dependent  $\chi'$  and  $\chi''$  signals of  $3^*\text{-Dy}$  measured under 0 Oe dc and 5 Oe ac fields (a). The frequency dependent  $\chi'$  and  $\chi''$  signals of  $3^*\text{-Dy}$  measured under a 2600 Oe dc field and a 5 Oe ac field in the 7.6–9.1 K temperature range (b).

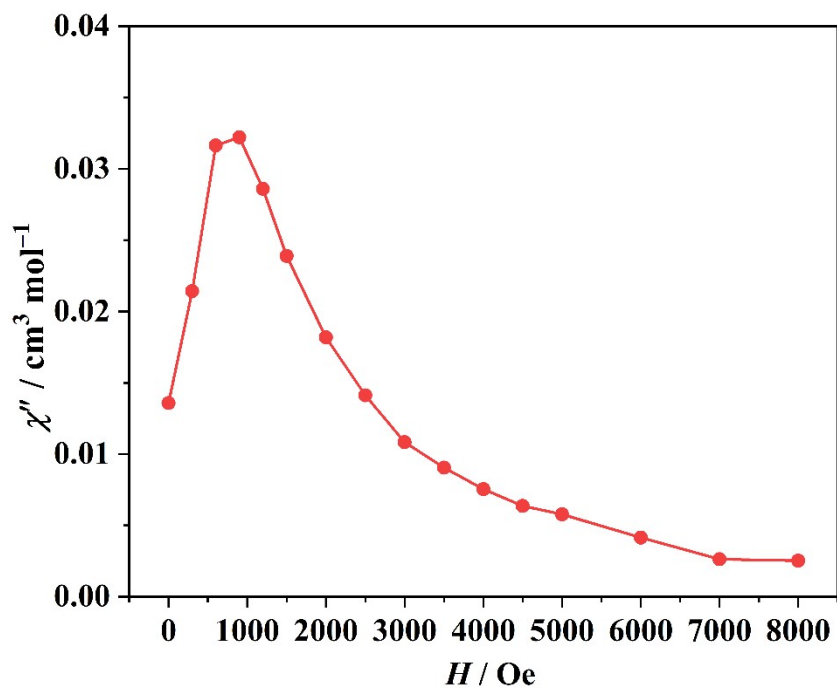

**Fig. S67** Field dependence of the  $\chi''$  component of ac susceptibility components after irradiation with  $\omega = 100$  Hz at 2 K of  $2^*-\text{Dy}$ .

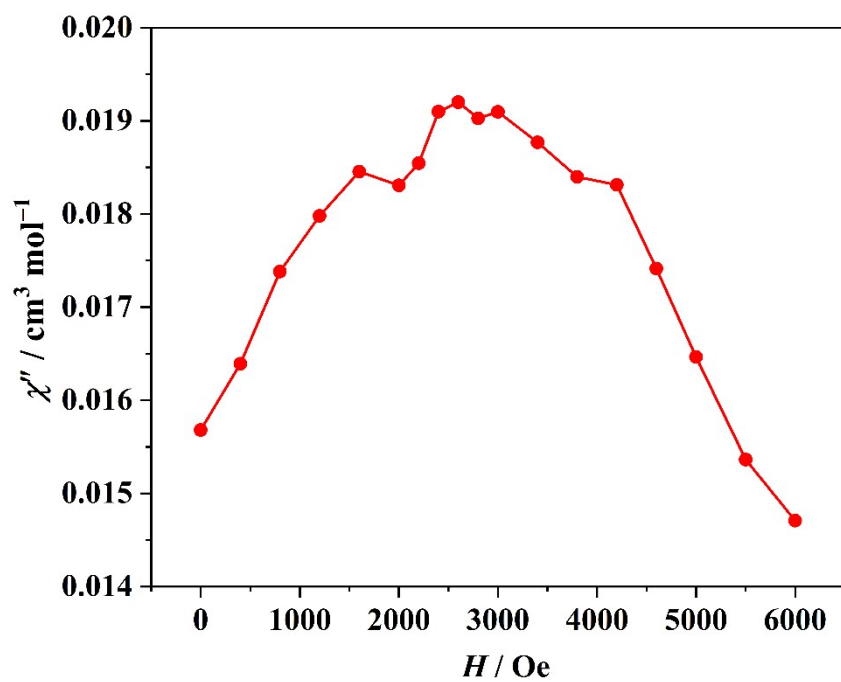

**Fig. S68** Field dependence of the  $\chi''$  component of ac susceptibility components after irradiation with  $\omega = 1000$  Hz at 2 K of  $3^*-\text{Dy}$ .

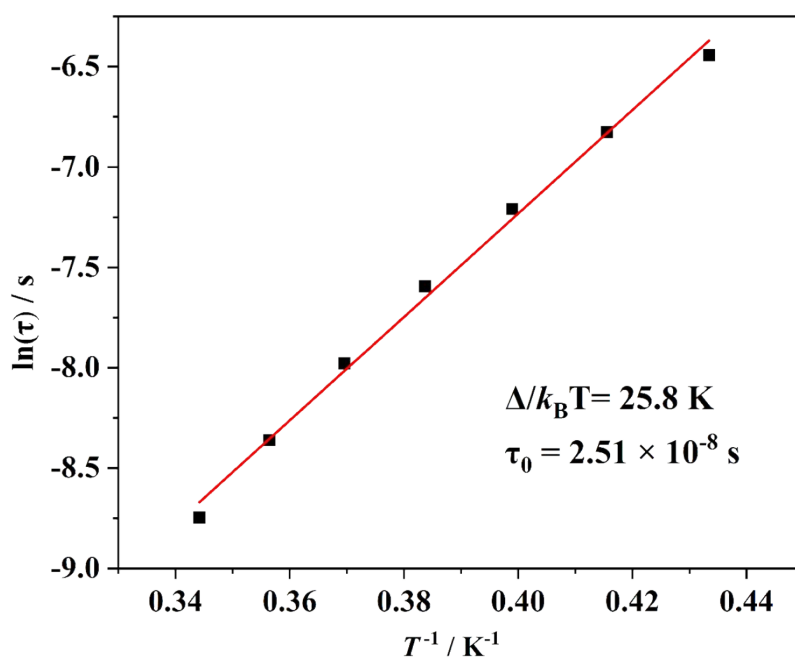

**Fig. S69** Arrhenius plots for the magnetic relaxation process after irradiation based on the peak values of  $\chi''$  in the temperature-dependent ac susceptibility data of **2\*-Dy**. The red full line corresponds to a linear fit.

**Table S1.** Crystallographic data for **1-Dy**, **2-Dy**, and **3-Dy**.

|                              | <b>1-Dy</b>                | <b>2-Dy</b>                | <b>3-Dy</b>                  |
|------------------------------|----------------------------|----------------------------|------------------------------|
| Formula                      | $C_{18}H_{24}NO_{14}P_4Dy$ | $C_{17}H_{24}NO_{14}P_4Dy$ | $C_{17}H_{24}ClDyNO_{14}P_4$ |
| $M_r$ (g·mol <sup>-1</sup> ) | 764.76                     | 752.75                     | 788.20                       |
| Space group                  | <i>P</i> -1                | <i>P</i> -1                | <i>P</i> -1                  |
| Crystal system               | Triclinic                  | Triclinic                  | Triclinic                    |
| $a$ (Å)                      | 10.5311(2)                 | 10.5071(2)                 | 10.5188(4)                   |
| $b$ (Å)                      | 10.5810(2)                 | 10.5386(2)                 | 10.7462(5)                   |
| $c$ (Å)                      | 15.6015(3)                 | 15.8382(3)                 | 15.3229(6)                   |
| $\alpha$ (°)                 | 74.3990(10)                | 76.939(2)                  | 77.130(4)                    |
| $\beta$ (°)                  | 75.4030(10)                | 72.093(2)                  | 76.471(3)                    |
| $\gamma$ (°)                 | 86.6220(10)                | 86.413(1)                  | 87.652(4)                    |
| $V$ (Å <sup>3</sup> )        | 1620.30(5)                 | 1625.59(6)                 | 1641.58(12)                  |
| $Z$                          | 2                          | 2                          | 2                            |
| $F(000)$                     | 754.0                      | 742                        | 776                          |
| $D_c$ (g cm <sup>-3</sup> )  | 1.568                      | 1.538                      | 1.595                        |

|                                               |                |        |                |        |                |        |
|-----------------------------------------------|----------------|--------|----------------|--------|----------------|--------|
| $\mu$ (mm <sup>-1</sup> )                     | 14.724         |        | 2.550          |        | 2.608          |        |
| $R_{\text{int}}$                              | 0.1008         |        | 0.0380         |        | 0.0595         |        |
|                                               | -12<= $h$ <=10 |        | -12<= $h$ <=12 |        | -12<= $h$ <=12 |        |
| limiting indices                              | -12<= $k$ <=12 |        | -11<= $k$ <=12 |        | -12<= $k$ <=12 |        |
|                                               | -18<= $l$ <=18 |        | -18<= $l$ <=18 |        | -17<= $l$ <=17 |        |
| Collected reflections                         | 18932          |        | 16698          |        | 15851          |        |
| Unique reflections                            | 5386           |        | 5860           |        | 5294           |        |
| GOF on $F^2$                                  | 1.067          |        | 1.108          |        | 1.042          |        |
| $R_1, wR_2$ [ $I > 2\sigma(I)$ ] <sup>a</sup> | 0.0642         | 0.1742 | 0.0274         | 0.0720 | 0.0458         | 0.1102 |
| $R_1, wR_2$ [all data] <sup>b</sup>           | 0.0660         | 0.1765 | 0.0293         | 0.0729 | 0.0567         | 0.1190 |

$${}^a R_1 = \frac{\sum ||F_o| - |F_c||}{\sum |F_o|} \cdot {}^b wR_2 = \left\{ \frac{\sum [w(F_o^2 - F_c^2)^2]}{\sum w(F_o^2)^2} \right\}^{1/2}.$$

**Table S2.** Selected bond lengths (Å) and angles (°) for **1-Dy** at 150 K.

| <b>1-Dy</b>   |          |             |           |
|---------------|----------|-------------|-----------|
| Dy(1)-O(6)#1  | 2.362(4) | P(2)-C(14)  | 1.846(8)  |
| Dy(1)-O(5)    | 2.250(5) | O(4)-C(14)  | 1.451(9)  |
| Dy(1)-O(12)#2 | 2.329(5) | O(13)-C(15) | 1.423(9)  |
| Dy(1)-O(11)   | 2.304(4) | N(1)-C(5)   | 1.349(12) |
| Dy(1)-O(3)#1  | 2.329(5) | N(1)-C(1)   | 1.323(12) |
| Dy(1)-O(8)    | 2.326(5) | C(18)-C(11) | 1.340(12) |
| Dy(1)-O(10)#2 | 2.329(5) | C(14)-C(16) | 1.526(10) |
| P(1)-O(6)     | 1.523(5) | C(15)-C(17) | 1.524(11) |
| P(1)-O(5)     | 1.492(5) | C(3)-C(4)   | 1.409(12) |
| P(1)-O(7)     | 1.570(5) | C(3)-C(2)   | 1.386(13) |
| P(1)-C(14)    | 1.835(7) | C(3)-C(6)   | 1.469(12) |
| P(4)-O(12)    | 1.507(5) | C(5)-C(4)   | 1.374(12) |
| P(4)-O(11)    | 1.509(5) | C(1)-C(2)   | 1.364(12) |
| P(4)-O(14)    | 1.559(5) | C(8)-C(7)   | 1.469(12) |
| P(4)-C(15)    | 1.846(7) | C(8)-C(9)   | 1.387(15) |
| P(3)-O(8)     | 1.513(5) | C(8)-C(13)  | 1.402(14) |
| P(3)-O(10)    | 1.509(5) | C(6)-C(7)   | 1.310(14) |
| P(3)-O(9)     | 1.560(5) | C(9)-C(10)  | 1.381(13) |
| P(3)-C(15)    | 1.825(7) | C(12)-C(13) | 1.376(13) |
| P(2)-O(2)     | 1.574(5) | C(12)-C(11) | 1.376(17) |
| P(2)-O(3)     | 1.503(5) | C(10)-C(11) | 1.369(17) |
| P(2)-O(1)     | 1.502(5) |             |           |

|                       |            |                    |          |
|-----------------------|------------|--------------------|----------|
| O(5)-Dy(1)-O(6)#1     | 79.52(17)  | O(1)-P(2)-O(2)     | 107.1(3) |
| O(5)-Dy(1)-O(12)#2    | 156.63(18) | O(1)-P(2)-O(3)     | 116.4(3) |
| O(5)-Dy(1)-O(11)      | 79.26(17)  | O(1)-P(2)-C(14)    | 108.0(3) |
| O(5)-Dy(1)-O(3)#1     | 83.93(17)  | P(1)-O(6)-Dy(1)#1  | 142.5(3) |
| O(5)-Dy(1)-O(8)       | 111.84(18) | P(1)-O(5)-Dy(1)    | 154.4(3) |
| O(5)-Dy(1)-O(10)#2    | 108.62(18) | P(4)-O(12)-Dy(1)#2 | 136.0(3) |
| O(12)#2-Dy(1)-O(6)#1  | 82.62(16)  | P(4)-O(11)-Dy(1)   | 138.8(3) |
| O(10)#2-Dy(1)-O(12)#2 | 80.56(16)  | P(2)-O(3)-Dy(1)#1  | 142.0(3) |
| O(11)-Dy(1)-O(6)#1    | 133.63(16) | P(3)-O(8)-Dy(1)    | 135.4(3) |
| O(11)-Dy(1)-O(12)#2   | 124.11(17) | P(3)-O(10)-Dy(1)#2 | 136.5(3) |
| O(11)-Dy(1)-O(3)#1    | 139.05(17) | C(1)-N(1)-C(5)     | 121.3(7) |
| O(11)-Dy(1)-O(8)      | 76.27(16)  | P(1)-C(14)-P(2)    | 112.5(3) |
| O(11)-Dy(1)-O(10)#2   | 75.54(17)  | O(4)-C(14)-P(1)    | 109.4(5) |
| O(3)#1-Dy(1)-O(6)#1   | 78.10(16)  | O(4)-C(14)-P(2)    | 105.4(5) |
| O(3)#1-Dy(1)-O(12)#2  | 77.70(16)  | O(4)-C(14)-C(16)   | 106.7(5) |
| O(3)#1-Dy(1)-O(10)#2  | 74.98(17)  | C(16)-C(14)-P(1)   | 110.1(5) |
| O(8)-Dy(1)-O(6)#1     | 74.25(17)  | C(16)-C(14)-P(2)   | 112.3(5) |
| O(8)-Dy(1)-O(12)#2    | 77.19(16)  | P(3)-C(15)-P(4)    | 107.8(3) |
| O(8)-Dy(1)-O(3)#1     | 144.58(16) | O(13)-C(15)-P(4)   | 110.3(5) |
| O(8)-Dy(1)-O(10)#2    | 124.36(18) | O(13)-C(15)-P(3)   | 109.2(5) |
| O(10)#2-Dy(1)-O(6)#1  | 150.70(15) | O(13)-C(15)-C(17)  | 107.5(5) |
| O(6)-P(1)-O(7)        | 108.1(3)   | C(17)-C(15)-P(4)   | 110.5(5) |
| O(6)-P(1)-C(14)       | 108.3(3)   | C(17)-C(15)-P(3)   | 111.5(5) |
| O(5)-P(1)-O(6)        | 116.0(3)   | C(4)-C(3)-C(6)     | 124.9(9) |

|                  |          |                   |           |
|------------------|----------|-------------------|-----------|
| O(5)-P(1)-O(7)   | 109.1(3) | C(2)-C(3)-C(4)    | 117.2(8)  |
| O(5)-P(1)-C(14)  | 109.2(3) | C(2)-C(3)-C(6)    | 117.9(8)  |
| O(7)-P(1)-C(14)  | 105.7(3) | N(1)-C(5)-C(4)    | 119.9(8)  |
| O(12)-P(4)-O(11) | 115.9(3) | C(5)-C(4)-C(3)    | 120.0(8)  |
| O(12)-P(4)-O(14) | 108.5(3) | N(1)-C(1)-C(2)    | 121.2(8)  |
| O(12)-P(4)-C(15) | 105.5(3) | C(9)-C(8)-C(7)    | 116.9(9)  |
| O(11)-P(4)-O(14) | 111.0(3) | C(9)-C(8)-C(13)   | 118.5(8)  |
| O(11)-P(4)-C(15) | 108.6(3) | C(13)-C(8)-C(7)   | 124.6(9)  |
| O(14)-P(4)-C(15) | 106.8(3) | C(1)-C(2)-C(3)    | 120.4(8)  |
| O(8)-P(3)-O(9)   | 109.8(3) | C(7)-C(6)-C(3)    | 125.1(9)  |
| O(8)-P(3)-C(15)  | 110.0(3) | C(6)-C(7)-C(8)    | 126.5(9)  |
| O(10)-P(3)-O(8)  | 115.7(3) | C(10)-C(9)-C(8)   | 121.5(10) |
| O(10)-P(3)-O(9)  | 107.2(3) | C(13)-C(12)-C(11) | 118.9(9)  |
| O(10)-P(3)-C(15) | 106.5(3) | C(11)-C(10)-C(9)  | 118.1(11) |
| O(9)-P(3)-C(15)  | 107.1(3) | C(12)-C(13)-C(8)  | 120.4(10) |
| O(2)-P(2)-C(14)  | 107.4(3) | C(18)-C(11)-C(12) | 118.7(10) |
| O(3)-P(2)-O(2)   | 111.5(3) | C(18)-C(11)-C(10) | 118.7(11) |
| O(3)-P(2)-C(14)  | 106.1(3) | C(10)-C(11)-C(12) | 122.6(9)  |

---

**Table S3.** Selected bond lengths (Å) and angles (°) for **2-Dy** at 150 K.

| <b>2-Dy</b>   |          |             |          |
|---------------|----------|-------------|----------|
| Dy(1)-O(3)#1  | 2.329(2) | P(4)-O(10)  | 1.517(2) |
| Dy(1)-O(5)    | 2.239(2) | P(4)-C(15)  | 1.828(4) |
| Dy(1)-O(7)#1  | 2.379(2) | O(4)-C(14)  | 1.455(4) |
| Dy(1)-O(8)    | 2.301(2) | O(13)-C(15) | 1.445(4) |
| Dy(1)-O(10)#2 | 2.318(2) | C(14)-C(16) | 1.529(5) |
| Dy(1)-O(11)   | 2.332(2) | C(15)-C(17) | 1.535(5) |
| Dy(1)-O(12)#2 | 2.332(2) | N(1)-C(1)   | 1.338(6) |
| P(1)-O(5)     | 1.494(2) | N(1)-C(5)   | 1.328(6) |
| P(1)-O(6)     | 1.567(2) | C(1)-C(2)   | 1.331(7) |
| P(1)-O(7)     | 1.508(2) | C(2)-C(3)   | 1.399(7) |
| P(1)-C(14)    | 1.831(4) | C(3)-C(4)   | 1.390(7) |
| P(2)-O(1)     | 1.501(3) | C(3)-C(6)   | 1.467(7) |
| P(2)-O(2)     | 1.580(2) | C(4)-C(5)   | 1.379(6) |
| P(2)-O(3)     | 1.506(2) | C(6)-C(7)   | 1.310(7) |
| P(2)-C(14)    | 1.838(4) | C(7)-C(8)   | 1.490(6) |
| P(3)-O(11)    | 1.512(2) | C(8)-C(9)   | 1.373(7) |
| P(3)-O(12)    | 1.514(2) | C(8)-C(13)  | 1.380(7) |
| P(3)-O(14)    | 1.558(3) | C(9)-C(10)  | 1.371(8) |
| P(3)-C(15)    | 1.826(4) | C(10)-C(11) | 1.377(9) |
| P(4)-O(8)     | 1.501(2) | C(11)-C(12) | 1.384(9) |
| P(4)-O(9)     | 1.572(2) | C(12)-C(13) | 1.357(7) |

|                       |            |                    |            |
|-----------------------|------------|--------------------|------------|
| O(3)#1-Dy(1)-O(7)#1   | 78.38(8)   | O(8)-P(4)-C(15)    | 108.90(14) |
| O(3)#1-Dy(1)-O(12)#2  | 74.73(8)   | O(9)-P(4)-C(15)    | 105.97(15) |
| O(5)-Dy(1)-O(3)#1     | 84.19(8)   | O(10)-P(4)-O(9)    | 107.89(14) |
| O(5)-Dy(1)-O(7)#1     | 79.67(8)   | O(10)-P(4)-C(15)   | 105.94(14) |
| O(5)-Dy(1)-O(8)       | 79.89(8)   | P(2)-O(3)-Dy(1)#1  | 142.34(15) |
| O(5)-Dy(1)-O(10)#2    | 156.41(8)  | P(1)-O(5)-Dy(1)    | 155.83(15) |
| O(5)-Dy(1)-O(11)      | 110.97(8)  | P(1)-O(7)-Dy(1)#1  | 141.41(14) |
| O(5)-Dy(1)-O(12)#2    | 109.68(8)  | P(4)-O(8)-Dy(1)    | 139.25(14) |
| O(8)-Dy(1)-O(3)#1     | 138.44(8)  | P(4)-O(10)-Dy(1)#2 | 135.60(14) |
| O(8)-Dy(1)-O(7)#1     | 134.68(8)  | P(3)-O(11)-Dy(1)   | 135.40(14) |
| O(8)-Dy(1)-O(10)#2    | 123.69(8)  | P(3)-O(12)-Dy(1)#2 | 137.09(14) |
| O(8)-Dy(1)-O(11)      | 76.30(8)   | P(1)-C(14)-P(2)    | 112.71(18) |
| O(8)-Dy(1)-O(12)#2    | 75.03(8)   | O(4)-C(14)-P(1)    | 109.5(2)   |
| O(10)#2-Dy(1)-O(3)#1  | 77.77(8)   | O(4)-C(14)-P(2)    | 105.0(2)   |
| O(10)#2-Dy(1)-O(7)#1  | 81.94(8)   | O(4)-C(14)-C(16)   | 106.7(3)   |
| O(10)#2-Dy(1)-O(11)   | 77.55(8)   | C(16)-C(14)-P(1)   | 110.5(2)   |
| O(10)#2-Dy(1)-O(12)#2 | 80.20(8)   | C(16)-C(14)-P(2)   | 112.1(2)   |
| O(11)-Dy(1)-O(3)#1    | 145.03(8)  | P(3)-C(15)-P(4)    | 108.19(17) |
| O(11)-Dy(1)-O(7)#1    | 74.06(8)   | O(13)-C(15)-P(3)   | 108.6(2)   |
| O(11)-Dy(1)-O(12)#2   | 124.27(8)  | O(13)-C(15)-P(4)   | 109.9(2)   |
| O(12)#2-Dy(1)-O(7)#1  | 150.24(8)  | O(13)-C(15)-C(17)  | 107.5(3)   |
| O(5)-P(1)-O(6)        | 109.41(13) | C(17)-C(15)-P(3)   | 111.7(2)   |
| O(5)-P(1)-O(7)        | 116.38(14) | C(17)-C(15)-P(4)   | 110.9(2)   |
| O(5)-P(1)-C(14)       | 108.62(15) | C(1)-N(1)-C(5)     | 121.2(4)   |
| O(6)-P(1)-C(14)       | 105.70(15) | N(1)-C(1)-C(2)     | 121.7(5)   |

|                  |            |                   |          |
|------------------|------------|-------------------|----------|
| O(7)-P(1)-O(6)   | 107.38(13) | C(1)-C(2)-C(3)    | 119.4(5) |
| O(7)-P(1)-C(14)  | 108.81(15) | C(2)-C(3)-C(4)    | 118.5(4) |
| O(1)-P(2)-O(2)   | 107.57(14) | C(2)-C(3)-C(6)    | 115.3(5) |
| O(1)-P(2)-O(3)   | 115.86(14) | C(4)-C(3)-C(6)    | 126.2(5) |
| O(1)-P(2)-C(14)  | 108.10(16) | C(5)-C(4)-C(3)    | 118.9(4) |
| O(2)-P(2)-C(14)  | 107.57(14) | N(1)-C(5)-C(4)    | 120.3(4) |
| O(3)-P(2)-O(2)   | 111.41(14) | C(7)-C(6)-C(3)    | 124.4(5) |
| O(3)-P(2)-C(14)  | 106.00(15) | C(6)-C(7)-C(8)    | 126.4(5) |
| O(11)-P(3)-O(14) | 110.15(13) | C(9)-C(8)-C(7)    | 116.8(5) |
| O(11)-P(3)-C(15) | 109.14(14) | C(9)-C(8)-C(13)   | 118.2(4) |
| O(12)-P(3)-O(11) | 115.88(13) | C(13)-C(8)-C(7)   | 124.9(4) |
| O(12)-P(3)-O(14) | 107.97(14) | C(10)-C(9)-C(8)   | 121.7(5) |
| O(12)-P(3)-C(15) | 106.32(14) | C(9)-C(10)-C(11)  | 118.9(5) |
| O(14)-P(3)-C(15) | 107.27(15) | C(10)-C(11)-C(12) | 120.3(5) |
| O(8)-P(4)-O(9)   | 111.66(13) | C(13)-C(12)-C(11) | 119.4(5) |
| O(8)-P(4)-O(10)  | 115.89(14) | C(12)-C(13)-C(8)  | 121.5(5) |

---

**Table S4.** Selected bond lengths (Å) and angles (°) for **3-Dy** at 100 K.

| <b>3-Dy</b>   |          |             |           |
|---------------|----------|-------------|-----------|
| Dy(1)-O(5)    | 2.212(4) | Cl(1)-C(11) | 1.733(9)  |
| Dy(1)-O(12)#1 | 2.325(4) | O(4)-C(14)  | 1.466(8)  |
| Dy(1)-O(8)    | 2.307(5) | O(13)-C(15) | 1.439(8)  |
| Dy(1)-O(7)#2  | 2.381(4) | N(1)-C(5)   | 1.330(10) |
| Dy(1)-O(11)   | 2.317(5) | N(1)-C(1)   | 1.327(12) |
| Dy(1)-O(3)#2  | 2.325(4) | C(14)-C(16) | 1.530(9)  |
| Dy(1)-O(10)#1 | 2.324(5) | C(15)-C(17) | 1.519(10) |
| P(1)-O(5)     | 1.500(4) | C(5)-C(4)   | 1.355(12) |
| P(1)-O(7)     | 1.492(5) | C(11)-C(10) | 1.367(13) |
| P(1)-O(6)     | 1.567(5) | C(11)-C(12) | 1.352(14) |
| P(1)-C(14)    | 1.821(7) | C(4)-C(3)   | 1.388(16) |
| P(3)-O(12)    | 1.498(5) | C(9)-C(8)   | 1.375(13) |
| P(3)-O(11)    | 1.506(5) | C(9)-C(10)  | 1.372(12) |
| P(3)-O(14)    | 1.561(5) | C(8)-C(13)  | 1.359(16) |
| P(3)-C(15)    | 1.823(7) | C(8)-C(7)   | 1.58(2)   |
| P(4)-O(8)     | 1.485(5) | C(8)-C(6)   | 1.37(2)   |
| P(4)-O(10)    | 1.511(5) | C(12)-C(13) | 1.371(16) |
| P(4)-O(9)     | 1.556(5) | C(3)-C(2)   | 1.373(18) |
| P(4)-C(15)    | 1.838(8) | C(3)-C(18)  | 1.435(18) |
| P(2)-O(3)     | 1.502(5) | C(3)-C(19)  | 1.70(4)   |
| P(2)-O(2)     | 1.571(5) | C(1)-C(2)   | 1.319(17) |
| P(2)-O(1)     | 1.492(5) | C(7)-C(18)  | 1.29(3)   |
| P(2)-C(14)    | 1.825(7) | C(6)-C(19)  | 1.38(3)   |

|                       |            |                    |          |
|-----------------------|------------|--------------------|----------|
| O(5)-Dy(1)-O(12)#1    | 107.55(16) | P(1)-O(5)-Dy(1)    | 158.0(3) |
| O(5)-Dy(1)-O(8)       | 80.08(16)  | P(3)-O(12)-Dy(1)#1 | 137.1(3) |
| O(5)-Dy(1)-O(7)#2     | 79.97(15)  | P(4)-O(8)-Dy(1)    | 139.9(3) |
| O(5)-Dy(1)-O(11)      | 112.62(16) | P(1)-O(7)-Dy(1)#2  | 141.9(3) |
| O(5)-Dy(1)-O(3)#2     | 83.54(16)  | P(3)-O(11)-Dy(1)   | 135.9(3) |
| O(5)-Dy(1)-O(10)#1    | 156.27(1)  | P(2)-O(3)-Dy(1)#2  | 142.1(3) |
| O(12)#1-Dy(1)-O(7)#2  | 151.14(16) | P(4)-O(10)-Dy(1)#1 | 134.7(3) |
| O(12)#1-Dy(1)-O(3)#2  | 74.97(15)  | C(1)-N(1)-C(5)     | 121.3(8) |
| O(12)#1-Dy(1)-O(10)#1 | 80.81(16)  | P(1)-C(14)-P(2)    | 113.9(4) |
| O(8)-Dy(1)-O(12)#1    | 74.70(16)  | O(4)-C(14)-P(1)    | 108.8(4) |
| O(8)-Dy(1)-O(7)#2     | 134.04(16) | O(4)-C(14)-P(2)    | 105.6(4) |
| O(8)-Dy(1)-O(11)      | 75.59(16)  | O(4)-C(14)-C(16)   | 106.3(5) |
| O(8)-Dy(1)-O(3)#2     | 139.05(15) | C(16)-C(14)-P(1)   | 109.4(5) |
| O(8)-Dy(1)-O(10)#1    | 123.63(15) | C(16)-C(14)-P(2)   | 112.4(5) |
| O(11)-Dy(1)-O(12)#1   | 123.98(15) | P(3)-C(15)-P(4)    | 107.9(4) |
| O(11)-Dy(1)-O(7)#2    | 74.70(15)  | O(13)-C(15)-P(3)   | 108.6(4) |
| O(11)-Dy(1)-O(3)#2    | 145.15(16) | O(13)-C(15)-P(4)   | 109.0(4) |
| O(11)-Dy(1)-O(10)#1   | 77.80(16)  | O(13)-C(15)-C(17)  | 107.3(6) |
| O(3)#2-Dy(1)-O(7)#2   | 78.38(15)  | C(17)-C(15)-P(3)   | 112.1(5) |
| O(3)#2-Dy(1)-O(10)#1  | 77.18(16)  | C(17)-C(15)-P(4)   | 111.8(5) |
| O(10)#1-Dy(1)-O(7)#2  | 82.68(15)  | N(1)-C(5)-C(4)     | 119.9(8) |
| O(5)-P(1)-O(6)        | 110.5(3)   | C(10)-C(11)-Cl(1)  | 119.2(8) |
| O(5)-P(1)-C(14)       | 108.2(3)   | C(12)-C(11)-Cl(1)  | 118.6(8) |

|                  |          |                   |           |
|------------------|----------|-------------------|-----------|
| O(7)-P(1)-O(5)   | 115.5(3) | C(12)-C(11)-C(10) | 122.2(9)  |
| O(7)-P(1)-O(6)   | 107.8(3) | C(5)-C(4)-C(3)    | 119.5(10) |
| O(7)-P(1)-C(14)  | 108.2(3) | C(10)-C(9)-C(8)   | 121.3(9)  |
| O(6)-P(1)-C(14)  | 106.2(3) | C(9)-C(8)-C(7)    | 108.8(11) |
| O(12)-P(3)-O(11) | 116.3(3) | C(13)-C(8)-C(9)   | 118.1(9)  |
| O(12)-P(3)-O(14) | 107.5(3) | C(13)-C(8)-C(7)   | 133.0(12) |
| O(12)-P(3)-C(15) | 106.8(3) | C(13)-C(8)-C(6)   | 100.4(15) |
| O(11)-P(3)-O(14) | 110.7(3) | C(6)-C(8)-C(9)    | 141.5(15) |
| O(11)-P(3)-C(15) | 108.4(3) | C(11)-C(10)-C(9)  | 118.1(8)  |
| O(14)-P(3)-C(15) | 106.7(3) | C(11)-C(12)-C(13) | 118.3(9)  |
| O(8)-P(4)-O(10)  | 115.7(3) | C(4)-C(3)-C(18)   | 135.4(15) |
| O(8)-P(4)-O(9)   | 112.7(3) | C(4)-C(3)-C(19)   | 95.8(14)  |
| O(8)-P(4)-C(15)  | 108.5(3) | C(2)-C(3)-C(4)    | 117.7(10) |
| O(10)-P(4)-O(9)  | 106.7(3) | C(2)-C(3)-C(18)   | 106.9(13) |
| O(10)-P(4)-C(15) | 106.4(3) | C(2)-C(3)-C(19)   | 146.6(14) |
| O(9)-P(4)-C(15)  | 106.4(3) | C(2)-C(1)-N(1)    | 120.7(10) |
| O(3)-P(2)-O(2)   | 112.0(3) | C(1)-C(2)-C(3)    | 120.9(10) |
| O(3)-P(2)-C(14)  | 105.6(3) | C(8)-C(13)-C(12)  | 122.0(9)  |
| O(2)-P(2)-C(14)  | 107.4(3) | C(18)-C(7)-C(8)   | 122(2)    |
| O(1)-P(2)-O(3)   | 116.4(3) | C(7)-C(18)-C(3)   | 118.3(18) |
| O(1)-P(2)-O(2)   | 106.8(3) | C(8)-C(6)-C(19)   | 115(3)    |
| O(1)-P(2)-C(14)  | 108.3(3) | C(6)-C(19)-C(3)   | 111(2)    |

---

**Table S5.** Continuous Shape Measure (CShM) analyses of geometries for **1-Dy** by SHAPE 2.0 Software.

| Geometry                                             | Dy     |
|------------------------------------------------------|--------|
| Heptagon ( $D_{7h}$ )                                | 34.408 |
| Hexagonal pyramid ( $C_{6v}$ )                       | 21.011 |
| Pentagonal bipyramid ( $D_{5h}$ )                    | 5.438  |
| Capped octahedron ( $C_{3v}$ )                       | 0.524  |
| Capped trigonal prism J2( $C_{2v}$ )                 | 1.162  |
| Johnson pentagonal bipyramid J13 ( $D_{5h}$ )        | 8.724  |
| Johnson elongated triangular pyramid J7 ( $C_{3v}$ ) | 19.285 |

**Table S6.** Continuous Shape Measure (CShM) analyses of geometries for **2-Dy** by SHAPE 2.0 Software.

| Geometry                                             | Dy     |
|------------------------------------------------------|--------|
| Heptagon ( $D_{7h}$ )                                | 34.187 |
| Hexagonal pyramid ( $C_{6v}$ )                       | 21.099 |
| Pentagonal bipyramid ( $D_{5h}$ )                    | 5.381  |
| Capped octahedron ( $C_{3v}$ )                       | 0.518  |
| Capped trigonal prism J2( $C_{2v}$ )                 | 1.308  |
| Johnson pentagonal bipyramid J13 ( $D_{5h}$ )        | 8.535  |
| Johnson elongated triangular pyramid J7 ( $C_{3v}$ ) | 19.311 |

**Table S7.** Continuous Shape Measure (CShM) analyses of geometries for **3-Dy** by SHAPE 2.0 Software.

| Geometry                                             | Dy     |
|------------------------------------------------------|--------|
| Heptagon ( $D_{7h}$ )                                | 34.205 |
| Hexagonal pyramid ( $C_{6v}$ )                       | 21.181 |
| Pentagonal bipyramid ( $D_{5h}$ )                    | 5.367  |
| Capped octahedron ( $C_{3v}$ )                       | 0.573  |
| Capped trigonal prism J2( $C_{2v}$ )                 | 1.078  |
| Johnson pentagonal bipyramid J13 ( $D_{5h}$ )        | 8.469  |
| Johnson elongated triangular pyramid J7 ( $C_{3v}$ ) | 19.165 |

**Table S8.** Details of Hydrogen Bond Interactions in **1-Dy** at 150 K.

| D–H...A       | $d(\text{D–H})$ (Å) | $d(\text{H...A})$ (Å) | $d(\text{D...A})$ (Å) | $\angle(\text{DHA})$ (deg) |
|---------------|---------------------|-----------------------|-----------------------|----------------------------|
| N1–H1...O1    | 0.88                | 1.81                  | 2.674(9)              | 169                        |
| O4–H4...O12   | 0.84                | 1.93                  | 2.756(7)              | 166                        |
| O13–H13...O3  | 0.84                | 2.14                  | 2.972(7)              | 171                        |
| O13–H13...O12 | 0.84                | 2.57                  | 2.986(6)              | 111                        |

**Table S9.** Details of Hydrogen Bond Interactions in **2-Dy** at 150 K.

| D–H...A       | $d(\text{D–H})$ (Å) | $d(\text{H...A})$ (Å) | $d(\text{D...A})$ (Å) | $\angle(\text{DHA})$ (deg) |
|---------------|---------------------|-----------------------|-----------------------|----------------------------|
| N1–H1...O1    | 0.82(6)             | 1.89(6)               | 2.675(4)              | 158(6)                     |
| O4–H4...O10   | 0.67(5)             | 2.06(5)               | 2.725(4)              | 176(2)                     |
| O13–H13...O3  | 0.84                | 2.28                  | 3.007(3)              | 146                        |
| O13–H13...O10 | 0.84(7)             | 2.48                  | 2.981(3)              | 119                        |

**Table S10.** Details of Hydrogen Bond Interactions in **3-Dy** at 150 K.

| D-H...A       | $d(\text{D-H})$ (Å) | $d(\text{H...A})$ (Å) | $d(\text{D...A})$ (Å) | $\angle(\text{DHA})$ (deg) |
|---------------|---------------------|-----------------------|-----------------------|----------------------------|
| N1-H1A...O1   | 0.88                | 1.80                  | 2.665(9)              | 169                        |
| O4-H4...O10   | 0.84                | 1.92                  | 2.758(6)              | 171                        |
| O13-H13...O3  | 0.84                | 2.10                  | 2.939(6)              | 176                        |
| O13-H13...O10 | 0.84                | 2.59                  | 2.967(6)              | 109                        |

**Table S11** The Cole-Cole fitting parameters of **3\*-Dy** from 7.6 K to 9.1 K based on the generalized Debye law.

| T        | 7.6        | 7.9        | 8.2        | 8.5        | 8.8        | 9.1       |
|----------|------------|------------|------------|------------|------------|-----------|
| $\tau$   | 2.23556E-4 | 1.41165E-4 | 9.14013E-5 | 5.93696E-5 | 3.61323E-5 | 2.0361E-5 |
| $\alpha$ | 0.30984    | 0.25129    | 0.22716    | 0.21767    | 0.24574    | 0.2793    |
